# Supplementary material for: Into the Dark: Exploring the Deep Ocean with Single-Virus Genomics
Source: MDPI journal article supplement (doi:10.3390/v14071589), 2022-07-21
Supplement: s1 [file s1]

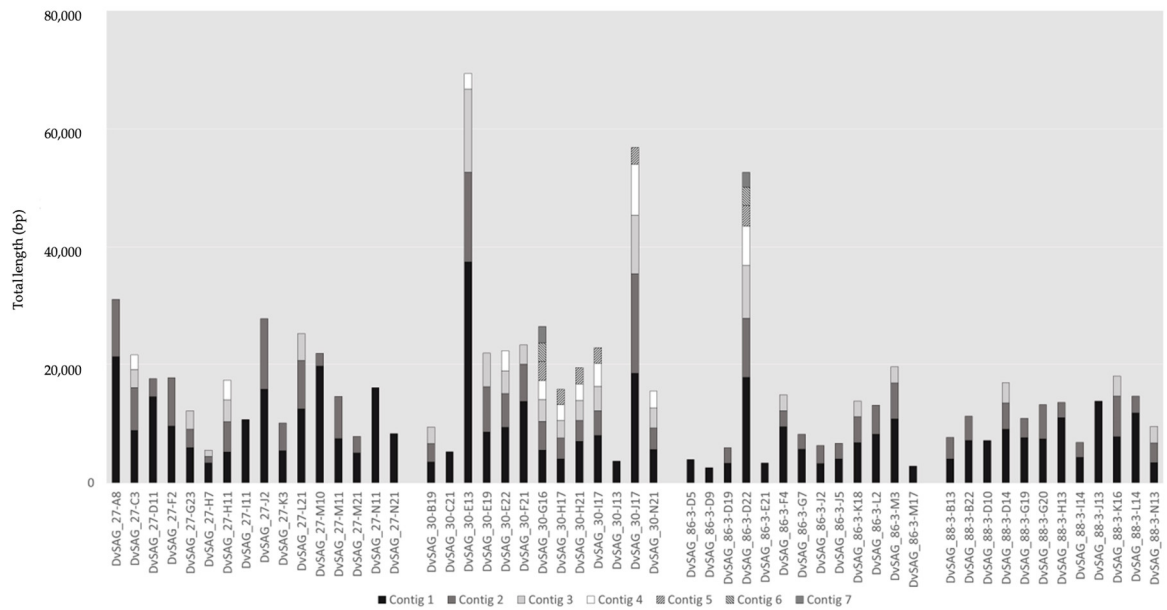

**Supplementary Figure S1.** vSAG contigs information Each bar represent one of the sequenced vSAGs with contigs longer than 2500 bp. Every color within each bar corresponds with different contigs from the same vSAG.

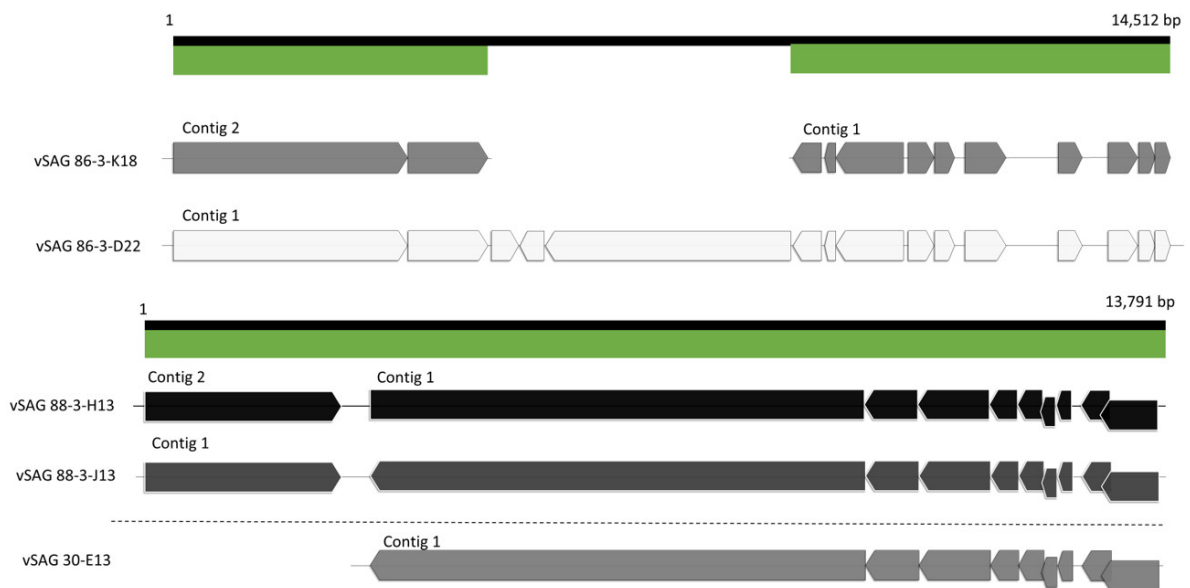

**Supplementary Figure S2.** Genome alignment between related vSAGs. Green color indicates identical nucleotide positions along the alignment.
