# Supplementary material for: Into the Dark: Exploring the Deep Ocean with Single-Virus Genomics
Source: Viruses. 2022 Jul 21;14(7):1589. doi: 10.3390/v14071589 (PMC9322844; doi:10.3390/v14071589)
Supplement: Supplementary file 1 [file viruses-14-01589-s001.zip]

Archive with 6 entries (6 files):
- TableS1-vSAG-information.xlsx
- TableS2-vSAGannotation.xlsx
- TableS3-AMGs.xlsx
- TableS4-Relatedviruses.xlsx
- TableS5-RelatedvSAGs.xlsx
- viruses-1760592-supplementary figures.pdf
