# Supplementary material for: Into the Dark: Exploring the Deep Ocean with Single-Virus Genomics
Source: Viruses. 2022 Jul 21;14(7):1589. doi: 10.3390/v14071589 (PMC9322844; doi:10.3390/v14071589)
Supplement: Supplementary file 1 [file viruses-14-01589-s001.zip › TableS1-vSAG-information.xlsx]

## Sheet: Table S1. vSAG Information
vSAG	Sampling code	Region	Depth (m)	# Contigs	vSAG	Sequence Length	Total length			Row Labels	Count of vSAG
vSAG 27-A8	MSP114	Pacific Ocean	200 (OMZ)	2	vSAG 27-A8 Contig 1	21284	21284			vSAG 27-A8	2
vSAG 27-A8	MSP114	Pacific Ocean	200 (OMZ)		vSAG 27-A8 Contig 2	9872				vSAG 27-C3	4
vSAG 27-C3	MSP114	Pacific Ocean	200 (OMZ)	4	vSAG 27-C3 Contig 1	8832	21618			vSAG 27-D11	2
vSAG 27-C3	MSP114	Pacific Ocean	200 (OMZ)		vSAG 27-C3 Contig 2	7244				vSAG 27-F2	2
vSAG 27-C3	MSP114	Pacific Ocean	200 (OMZ)		vSAG 27-C3 Contig 3	3018				vSAG 27-G23	3
vSAG 27-C3	MSP114	Pacific Ocean	200 (OMZ)		vSAG 27-C3 Contig 4	2524				vSAG 27-H11	4
vSAG 27-D11	MSP114	Pacific Ocean	200 (OMZ)	2	vSAG 27-D11 Contig 1	14557	17591			vSAG 27-H7	1
vSAG 27-D11	MSP114	Pacific Ocean	200 (OMZ)		vSAG 27-D11 Contig 2	3034				vSAG 27-I11	1
vSAG 27-F2	MSP114	Pacific Ocean	200 (OMZ)	2	vSAG 27-F2 Contig 1	9558	17769			vSAG 27-J2	2
vSAG 27-F2	MSP114	Pacific Ocean	200 (OMZ)		vSAG 27-F2 Contig 2	8211				vSAG 27-K3	2
vSAG 27-G23	MSP114	Pacific Ocean	200 (OMZ)	3	vSAG 27-G23 Contig 1	5934	12148			vSAG 27-L21	3
vSAG 27-G23	MSP114	Pacific Ocean	200 (OMZ)		vSAG 27-G23 Contig 2	3115				vSAG 27-M10	1
vSAG 27-G23	MSP114	Pacific Ocean	200 (OMZ)		vSAG 27-G23 Contig 3	3099				vSAG 27-M11	2
vSAG 27-H7	MSP114	Pacific Ocean	200 (OMZ)	1	vSAG 27-H7 Contig 1	3369	3369			vSAG 27-M21	2
vSAG 27-H11	MSP114	Pacific Ocean	200 (OMZ)	4	vSAG 27-H11 Contig 1	5190	17323			vSAG 27-N11	1
vSAG 27-H11	MSP114	Pacific Ocean	200 (OMZ)		vSAG 27-H11 Contig 2	5102				vSAG 27-N21	1
vSAG 27-H11	MSP114	Pacific Ocean	200 (OMZ)		vSAG 27-H11 Contig 3	3693				vSAG 30-B19	3
vSAG 27-H11	MSP114	Pacific Ocean	200 (OMZ)		vSAG 27-H11 Contig 4	3338				vSAG 30-C21	1
vSAG 27-I11	MSP114	Pacific Ocean	200 (OMZ)	1	vSAG 27-I11 Contig 1	10667	10667			vSAG 30-E13	4
vSAG 27-J2	MSP114	Pacific Ocean	200 (OMZ)	2	vSAG 27-J2 Contig 1	15794	27699			vSAG 30-E19	3
vSAG 27-J2	MSP114	Pacific Ocean	200 (OMZ)		vSAG 27-J2 Contig 2	11905				vSAG 30-E22	4
vSAG 27-K3	MSP114	Pacific Ocean	200 (OMZ)	2	vSAG 27-K3 Contig 1	5403	10115			vSAG 30-F21	3
vSAG 27-K3	MSP114	Pacific Ocean	200 (OMZ)		vSAG 27-K3 Contig 2	4712				vSAG 30-G16	7
vSAG 27-L21	MSP114	Pacific Ocean	200 (OMZ)	3	vSAG 27-L21 Contig 1	12451	25166			vSAG 30-H17	5
vSAG 27-L21	MSP114	Pacific Ocean	200 (OMZ)		vSAG 27-L21 Contig 2	8222				vSAG 30-H21	5
vSAG 27-L21	MSP114	Pacific Ocean	200 (OMZ)		vSAG 27-L21 Contig 3	4493				vSAG 30-I17	5
vSAG 27-M10	MSP114	Pacific Ocean	200 (OMZ)	1	vSAG 27-M10 Contig 1	19712	19712			vSAG 30-J13	1
vSAG 27-M11	MSP114	Pacific Ocean	200 (OMZ)	2	vSAG 27-M11 Contig 1	7459	14573			vSAG 30-J17	5
vSAG 27-M11	MSP114	Pacific Ocean	200 (OMZ)		vSAG 27-M11 Contig 2	7114				vSAG 30-N21	4
vSAG 27-M21	MSP114	Pacific Ocean	200 (OMZ)	2	vSAG 27-M21 Contig 1	5021	7845			vSAG 86-3-D19	2
vSAG 27-M21	MSP114	Pacific Ocean	200 (OMZ)		vSAG 27-M21 Contig 2	2824				vSAG 86-3-D22	7
vSAG 27-N11	MSP114	Pacific Ocean	200 (OMZ)	1	vSAG 27-N11 Contig 1	16036	16036			vSAG 86-3-D5	1
vSAG 27-N21	MSP114	Pacific Ocean	200 (OMZ)	1	vSAG 27-N21 Contig 1	8317	8317			vSAG 86-3-D9	1
vSAG 30-B19	MSP134	Atlantic Ocean	4000	3	vSAG 30-B19 Contig 1	3506	9442			vSAG 86-3-E21	1
vSAG 30-B19	MSP134	Atlantic Ocean	4000		vSAG 30-B19 Contig 2	3134				vSAG 86-3-F4	3
vSAG 30-B19	MSP134	Atlantic Ocean	4000		vSAG 30-B19 Contig 3	2802				vSAG 86-3-G7	2
vSAG 30-C21	MSP134	Atlantic Ocean	4000	1	vSAG 30-C21 Contig 1	5256	5256			vSAG 86-3-J2	2
vSAG 30-E13	MSP134	Atlantic Ocean	4000	4	vSAG 30-E13 Contig 1	37461	69361			vSAG 86-3-J5	2
vSAG 30-E13	MSP134	Atlantic Ocean	4000		vSAG 30-E13 Contig 2	15221				vSAG 86-3-K18	3
vSAG 30-E13	MSP134	Atlantic Ocean	4000		vSAG 30-E13 Contig 3	14064				vSAG 86-3-L2	2
vSAG 30-E13	MSP134	Atlantic Ocean	4000		vSAG 30-E13 Contig 4	2615				vSAG 86-3-M17	1
vSAG 30-E19	MSP134	Atlantic Ocean	4000	3	vSAG 30-E19 Contig 1	8552	21917			vSAG 86-3-M3	3
vSAG 30-E19	MSP134	Atlantic Ocean	4000		vSAG 30-E19 Contig 2	7671				vSAG 88-3-B13	2
vSAG 30-E19	MSP134	Atlantic Ocean	4000		vSAG 30-E19 Contig 3	5694				vSAG 88-3-B22	2
vSAG 30-E22	MSP134	Atlantic Ocean	4000	4	vSAG 30-E22 Contig 1	9341	22304			vSAG 88-3-D10	1
vSAG 30-E22	MSP134	Atlantic Ocean	4000		vSAG 30-E22 Contig 2	5722				vSAG 88-3-D14	3
vSAG 30-E22	MSP134	Atlantic Ocean	4000		vSAG 30-E22 Contig 3	3859				vSAG 88-3-G19	2
vSAG 30-E22	MSP134	Atlantic Ocean	4000		vSAG 30-E22 Contig 4	3382				vSAG 88-3-G20	2
vSAG 30-F21	MSP134	Atlantic Ocean	4000	3	vSAG 30-F21 Contig 1	13741	23298			vSAG 88-3-H13	2
vSAG 30-F21	MSP134	Atlantic Ocean	4000		vSAG 30-F21 Contig 2	6249				vSAG 88-3-I14	2
vSAG 30-F21	MSP134	Atlantic Ocean	4000		vSAG 30-F21 Contig 3	3308				vSAG 88-3-J13	1
vSAG 30-G16	MSP134	Atlantic Ocean	4000	7	vSAG 30-G16 Contig 1	5503	26410			vSAG 88-3-K16	3
vSAG 30-G16	MSP134	Atlantic Ocean	4000		vSAG 30-G16 Contig 2	4878				vSAG 88-3-L14	2
vSAG 30-G16	MSP134	Atlantic Ocean	4000		vSAG 30-G16 Contig 3	3673				vSAG 88-3-N13	3
vSAG 30-G16	MSP134	Atlantic Ocean	4000		vSAG 30-G16 Contig 4	3213				(blank)
vSAG 30-G16	MSP134	Atlantic Ocean	4000		vSAG 30-G16 Contig 5	3202				Grand Total	138
vSAG 30-G16	MSP134	Atlantic Ocean	4000		vSAG 30-G16 Contig 6	3140
vSAG 30-G16	MSP134	Atlantic Ocean	4000		vSAG 30-G16 Contig 7	2801
vSAG 30-H17	MSP134	Atlantic Ocean	4000	5	vSAG 30-H17 Contig 1	4045	15775
vSAG 30-H17	MSP134	Atlantic Ocean	4000		vSAG 30-H17 Contig 2	3546
vSAG 30-H17	MSP134	Atlantic Ocean	4000		vSAG 30-H17 Contig 3	2936
vSAG 30-H17	MSP134	Atlantic Ocean	4000		vSAG 30-H17 Contig 4	2708
vSAG 30-H17	MSP134	Atlantic Ocean	4000		vSAG 30-H17 Contig 5	2540
vSAG 30-H21	MSP134	Atlantic Ocean	4000	5	vSAG 30-H21 Contig 1	6975	19449
vSAG 30-H21	MSP134	Atlantic Ocean	4000		vSAG 30-H21 Contig 2	3552
vSAG 30-H21	MSP134	Atlantic Ocean	4000		vSAG 30-H21 Contig 3	3360
vSAG 30-H21	MSP134	Atlantic Ocean	4000		vSAG 30-H21 Contig 4	2781
vSAG 30-H21	MSP134	Atlantic Ocean	4000		vSAG 30-H21 Contig 5	2781
vSAG 30-I17	MSP134	Atlantic Ocean	4000	4	vSAG 30-I17 Contig 1	7982	22818
vSAG 30-I17	MSP134	Atlantic Ocean	4000		vSAG 30-I17 Contig 2	4154
vSAG 30-I17	MSP134	Atlantic Ocean	4000		vSAG 30-I17 Contig 3	4142
vSAG 30-I17	MSP134	Atlantic Ocean	4000		vSAG 30-I17 Contig 4	3870
vSAG 30-I17	MSP134	Atlantic Ocean	4000		vSAG 30-I17 Contig 5	2670
vSAG 30-J13	MSP134	Atlantic Ocean	4000	1	vSAG 30-J13 Contig 1	3674	3674
vSAG 30-J17	MSP134	Atlantic Ocean	4000	5	vSAG 30-J17 Contig 1	18480	56869
vSAG 30-J17	MSP134	Atlantic Ocean	4000		vSAG 30-J17 Contig 2	17011
vSAG 30-J17	MSP134	Atlantic Ocean	4000		vSAG 30-J17 Contig 3	9869
vSAG 30-J17	MSP134	Atlantic Ocean	4000		vSAG 30-J17 Contig 4	8645
vSAG 30-J17	MSP134	Atlantic Ocean	4000		vSAG 30-J17 Contig 5	2864
vSAG 30-N21	MSP134	Atlantic Ocean	4000	4	vSAG 30-N21 Contig 1	5620	15465
vSAG 30-N21	MSP134	Atlantic Ocean	4000		vSAG 30-N21 Contig 2	3636
vSAG 30-N21	MSP134	Atlantic Ocean	4000		vSAG 30-N21 Contig 3	3385
vSAG 30-N21	MSP134	Atlantic Ocean	4000		vSAG 30-N21 Contig 4	2824
vSAG 86-3-D5	Medimax	Mediterranean Sea	2000	1	vSAG 86-3-D5 Contig 1	3937	3937
vSAG 86-3-D9	Medimax	Mediterranean Sea	2000	1	vSAG 86-3-D9 Contig 1	2538	2538
vSAG 86-3-D19	Medimax	Mediterranean Sea	2000	2	vSAG 86-3-D19 Contig 1	3321	5947
vSAG 86-3-D19	Medimax	Mediterranean Sea	2000		vSAG 86-3-D19 Contig 2	2626
vSAG 86-3-D22	Medimax	Mediterranean Sea	2000	7	vSAG 86-3-D22 Contig 1	17807	52635
vSAG 86-3-D22	Medimax	Mediterranean Sea	2000		vSAG 86-3-D22 Contig 2	9938
vSAG 86-3-D22	Medimax	Mediterranean Sea	2000		vSAG 86-3-D22 Contig 3	9156
vSAG 86-3-D22	Medimax	Mediterranean Sea	2000		vSAG 86-3-D22 Contig 4	6611
vSAG 86-3-D22	Medimax	Mediterranean Sea	2000		vSAG 86-3-D22 Contig 5	3535
vSAG 86-3-D22	Medimax	Mediterranean Sea	2000		vSAG 86-3-D22 Contig 6	3071
vSAG 86-3-D22	Medimax	Mediterranean Sea	2000		vSAG 86-3-D22 Contig 7	2517
vSAG 86-3-E21	Medimax	Mediterranean Sea	2000	1	vSAG 86-3-E21 Contig 1	3362	3362
vSAG 86-3-F4	Medimax	Mediterranean Sea	2000	3	vSAG 86-3-F4 Contig 1	9451	14864
vSAG 86-3-F4	Medimax	Mediterranean Sea	2000		vSAG 86-3-F4 Contig 2	2710
vSAG 86-3-F4	Medimax	Mediterranean Sea	2000		vSAG 86-3-F4 Contig 3	2703
vSAG 86-3-G7	Medimax	Mediterranean Sea	2000	2	vSAG 86-3-G7 Contig 1	5647	8228
vSAG 86-3-G7	Medimax	Mediterranean Sea	2000		vSAG 86-3-G7 Contig 2	2581
vSAG 86-3-J2	Medimax	Mediterranean Sea	2000	2	vSAG 86-3-J2 Contig 1	3263	6292
vSAG 86-3-J2	Medimax	Mediterranean Sea	2000		vSAG 86-3-J2 Contig 2	3029
vSAG 86-3-J5	Medimax	Mediterranean Sea	2000	2	vSAG 86-3-J5 Contig 1	4025	6695
vSAG 86-3-J5	Medimax	Mediterranean Sea	2000		vSAG 86-3-J5 Contig 2	2670
vSAG 86-3-K18	Medimax	Mediterranean Sea	2000	3	vSAG 86-3-K18 Contig 1	6784	13776
vSAG 86-3-K18	Medimax	Mediterranean Sea	2000		vSAG 86-3-K18 Contig 2	4361
vSAG 86-3-K18	Medimax	Mediterranean Sea	2000		vSAG 86-3-K18 Contig 3	2631
vSAG 86-3-L2	Medimax	Mediterranean Sea	2000	2	vSAG 86-3-L2 Contig 1	8214	13113
vSAG 86-3-L2	Medimax	Mediterranean Sea	2000		vSAG 86-3-L2 Contig 2	4899
vSAG 86-3-M3	Medimax	Mediterranean Sea	2000	3	vSAG 86-3-M3 Contig 1	10776	19613
vSAG 86-3-M3	Medimax	Mediterranean Sea	2000		vSAG 86-3-M3 Contig 2	6099
vSAG 86-3-M3	Medimax	Mediterranean Sea	2000		vSAG 86-3-M3 Contig 3	2738
vSAG 86-3-M17	Medimax	Mediterranean Sea	2000	1	vSAG 86-3-M17 Contig 1	2838	2838
vSAG 88-3-B13	MSP131	Atlantic Ocean	4000	2	vSAG 88-3-B13 Contig 1	4059	7693
vSAG 88-3-B13	MSP131	Atlantic Ocean	4000		vSAG 88-3-B13 Contig 2	3634
vSAG 88-3-B22	MSP131	Atlantic Ocean	4000	2	vSAG 88-3-B22 Contig 1	7135	11237
vSAG 88-3-B22	MSP131	Atlantic Ocean	4000		vSAG 88-3-B22 Contig 2	4102
vSAG 88-3-D10	MSP131	Atlantic Ocean	4000	1	vSAG 88-3-D10 Contig 1	7169	7169
vSAG 88-3-D14	MSP131	Atlantic Ocean	4000	3	vSAG 88-3-D14 Contig 1	9062	16892
vSAG 88-3-D14	MSP131	Atlantic Ocean	4000		vSAG 88-3-D14 Contig 2	4394
vSAG 88-3-D14	MSP131	Atlantic Ocean	4000		vSAG 88-3-D14 Contig 3	3436
vSAG 88-3-G19	MSP131	Atlantic Ocean	4000	2	vSAG 88-3-G19 Contig 1	7645	10906
vSAG 88-3-G19	MSP131	Atlantic Ocean	4000		vSAG 88-3-G19 Contig 2	3261
vSAG 88-3-G20	MSP131	Atlantic Ocean	4000	2	vSAG 88-3-G20 Contig 1	7414	13224
vSAG 88-3-G20	MSP131	Atlantic Ocean	4000		vSAG 88-3-G20 Contig 2	5810
vSAG 88-3-H13	MSP131	Atlantic Ocean	4000	2	vSAG 88-3-H13 Contig 1	10996	13574
vSAG 88-3-H13	MSP131	Atlantic Ocean	4000		vSAG 88-3-H13 Contig 2	2578
vSAG 88-3-I14	MSP131	Atlantic Ocean	4000	2	vSAG 88-3-I14 Contig 1	4300	6855
vSAG 88-3-I14	MSP131	Atlantic Ocean	4000		vSAG 88-3-I14 Contig 2	2555
vSAG 88-3-J13	MSP131	Atlantic Ocean	4000	1	vSAG 88-3-J13 Contig 1	13791	13791
vSAG 88-3-K16	MSP131	Atlantic Ocean	4000	3	vSAG 88-3-K16 Contig 1	7786	18011
vSAG 88-3-K16	MSP131	Atlantic Ocean	4000		vSAG 88-3-K16 Contig 2	6828
vSAG 88-3-K16	MSP131	Atlantic Ocean	4000		vSAG 88-3-K16 Contig 3	3397
vSAG 88-3-L14	MSP131	Atlantic Ocean	4000	2	vSAG 88-3-L14 Contig 1	11790	14660
vSAG 88-3-L14	MSP131	Atlantic Ocean	4000		vSAG 88-3-L14 Contig 2	2870
vSAG 88-3-N13	MSP131	Atlantic Ocean	4000	3	vSAG 88-3-N13 Contig 1	3382	9517
vSAG 88-3-N13	MSP131	Atlantic Ocean	4000		vSAG 88-3-N13 Contig 2	3356
vSAG 88-3-N13	MSP131	Atlantic Ocean	4000		vSAG 88-3-N13 Contig 3	2779
