# Supplementary material for: Into the Dark: Exploring the Deep Ocean with Single-Virus Genomics
Source: Viruses. 2022 Jul 21;14(7):1589. doi: 10.3390/v14071589 (PMC9322844; doi:10.3390/v14071589)
Supplement: Supplementary file 1 [file viruses-14-01589-s001.zip › TableS2-vSAGannotation.xlsx]

## Sheet: Table S2. vSAG Annotation
vSAG Contig	Start	End	Contig length	Anotation
vSAG_27_A8 Contig 1	25	l
vSAG_27_A8 Contig 1	2700	5396	21284	-
vSAG_27_A8 Contig 1	5398	5835	21284	-
vSAG_27_A8 Contig 1	5861	6718	21284	-
vSAG_27_A8 Contig 1	6763	7716	21284	-
vSAG_27_A8 Contig 1	7731	8879	21284	-
vSAG_27_A8 Contig 1	8888	10147	21284	-
vSAG_27_A8 Contig 1	10166	10699	21284	-
vSAG_27_A8 Contig 1	10668	11603	21284	-
vSAG_27_A8 Contig 1	11617	11763	21284	-
vSAG_27_A8 Contig 1	11774	12106	21284	-
vSAG_27_A8 Contig 1	12106	12489	21284	-
vSAG_27_A8 Contig 1	12486	12776	21284	-
vSAG_27_A8 Contig 1	12781	13470	21284	-
vSAG_27_A8 Contig 1	13467	13718	21284	-
vSAG_27_A8 Contig 1	13724	14191	21284	-
vSAG_27_A8 Contig 1	14264	17416	21284	Metallophos_2
vSAG_27_A8 Contig 1	17406	18110	21284	-
vSAG_27_A8 Contig 1	18150	18338	21284	-
vSAG_27_A8 Contig 1	18335	18745	21284	-
vSAG_27_A8 Contig 1	18745	19203	21284	-
vSAG_27_A8 Contig 1	19200	19745	21284	-
vSAG_27_A8 Contig 1	19742	20128	21284	-
vSAG_27_A8 Contig 1	20118	20375	21284	-
vSAG_27_A8 Contig 1	20372	20656	21284	-
vSAG_27_A8 Contig 1	20661	21179	21284	-
vSAG_27_A8 Contig 2	3	l
vSAG_27_A8 Contig 2	1	8580	9872	Laminin_G_3
vSAG_27_A8 Contig 2	8589	9617	9872	-
vSAG_27_A8 Contig 2	9617	9871	9872	-
vSAG_27_C3 Contig 1	14	l
vSAG_27_C3 Contig 1	31	366	8832	-
vSAG_27_C3 Contig 1	312	872	8832	-
vSAG_27_C3 Contig 1	935	1510	8832	-
vSAG_27_C3 Contig 1	1500	2378	8832	-
vSAG_27_C3 Contig 1	2507	2794	8832	-
vSAG_27_C3 Contig 1	2821	3090	8832	-
vSAG_27_C3 Contig 1	3054	4130	8832	HTH_36
vSAG_27_C3 Contig 1	4159	5148	8832	DnaB_C
vSAG_27_C3 Contig 1	5148	6128	8832	-
vSAG_27_C3 Contig 1	6190	6630	8832	-
vSAG_27_C3 Contig 1	6939	7634	8832	-
vSAG_27_C3 Contig 1	7654	7896	8832	-
vSAG_27_C3 Contig 1	7835	8203	8832	-
vSAG_27_C3 Contig 1	8210	8308	8832	-
vSAG_27_C3 Contig 2	17	l
vSAG_27_C3 Contig 2	1	87	7244	-
vSAG_27_C3 Contig 2	581	811	7244	-
vSAG_27_C3 Contig 2	804	1154	7244	-
vSAG_27_C3 Contig 2	1206	1505	7244	-
vSAG_27_C3 Contig 2	1510	1755	7244	-
vSAG_27_C3 Contig 2	1798	2037	7244	-
vSAG_27_C3 Contig 2	2034	2384	7244	-
vSAG_27_C3 Contig 2	2503	3189	7244	-
vSAG_27_C3 Contig 2	3191	3745	7244	-
vSAG_27_C3 Contig 2	3748	4224	7244	-
vSAG_27_C3 Contig 2	4439	4846	7244	-
vSAG_27_C3 Contig 2	4884	5150	7244	-
vSAG_27_C3 Contig 2	5541	5906	7244	-
vSAG_27_C3 Contig 2	5923	6180	7244	-
vSAG_27_C3 Contig 2	6187	6672	7244	SSB
vSAG_27_C3 Contig 2	6729	7025	7244	-
vSAG_27_C3 Contig 2	7012	7242	7244	-
vSAG_27_C3 Contig 3	4	l
vSAG_27_C3 Contig 3	2	670	3018	-
vSAG_27_C3 Contig 3	655	1956	3018	DUF2201_N
vSAG_27_C3 Contig 3	1959	2207	3018	-
vSAG_27_C3 Contig 3	2204	3016	3018	-
vSAG_27_D11 Contig 1	24	l
vSAG_27_D11 Contig 1	2	205	14557	-
vSAG_27_D11 Contig 1	195	983	14557	Thymidylat_synt
vSAG_27_D11 Contig 1	968	2290	14557	Asn_synthase
vSAG_27_D11 Contig 1	2283	2723	14557	dCMP_cyt_deam_1
vSAG_27_D11 Contig 1	2710	2817	14557	-
vSAG_27_D11 Contig 1	2804	3079	14557	Ribosomal_S21
vSAG_27_D11 Contig 1	3063	4124	14557	-
vSAG_27_D11 Contig 1	4114	4464	14557	-
vSAG_27_D11 Contig 1	4406	5818	14557	DnaB_C
vSAG_27_D11 Contig 1	5833	6012	14557	-
vSAG_27_D11 Contig 1	6026	6700	14557	Thy1
vSAG_27_D11 Contig 1	6993	7202	14557	-
vSAG_27_D11 Contig 1	7357	7572	14557	CSD
vSAG_27_D11 Contig 1	7619	8719	14557	DNA_ligase_A_M
vSAG_27_D11 Contig 1	8756	9289	14557	-
vSAG_27_D11 Contig 1	9300	9482	14557	-
vSAG_27_D11 Contig 1	9443	9652	14557	-
vSAG_27_D11 Contig 1	9694	11067	14557	-
vSAG_27_D11 Contig 1	11124	11342	14557	-
vSAG_27_D11 Contig 1	11398	12639	14557	-
vSAG_27_D11 Contig 1	12658	12954	14557	-
vSAG_27_D11 Contig 1	13022	14092	14557	-
vSAG_27_D11 Contig 1	14089	14439	14557	-
vSAG_27_D11 Contig 1	14416	14556	14557	-
vSAG_27_D11 Contig 2	8	l
vSAG_27_D11 Contig 2	13	486	3034	-
vSAG_27_D11 Contig 2	476	616	3034	-
vSAG_27_D11 Contig 2	603	770	3034	-
vSAG_27_D11 Contig 2	792	1193	3034	-
vSAG_27_D11 Contig 2	1842	2243	3034	-
vSAG_27_D11 Contig 2	2265	2432	3034	-
vSAG_27_D11 Contig 2	2419	2559	3034	-
vSAG_27_D11 Contig 2	2549	3022	3034	-
vSAG_27_G23 Contig 1	8	l
vSAG_27_G23 Contig 1	1	405	5934	Ribonuc_red_lgC
vSAG_27_G23 Contig 1	1065	1592	5934	-
vSAG_27_G23 Contig 1	1592	1978	5934	DUF3310
vSAG_27_G23 Contig 1	1971	2267	5934	-
vSAG_27_G23 Contig 1	3668	3964	5934	-
vSAG_27_G23 Contig 1	3957	4343	5934	DUF3310
vSAG_27_G23 Contig 1	4343	4870	5934	-
vSAG_27_G23 Contig 1	5530	5934	5934	Ribonuc_red_lgC
vSAG_27_G23 Contig 3	6	l
vSAG_27_G23 Contig 3	1	612	3099	Ribonuc_red_sm
vSAG_27_G23 Contig 3	609	977	3099	HIT
vSAG_27_G23 Contig 3	961	1242	3099	-
vSAG_27_G23 Contig 3	1330	1707	3099	-
vSAG_27_G23 Contig 3	1878	2012	3099	-
vSAG_27_G23 Contig 3	2983	3099	3099	-
vSAG_27_M11 Contig 1	15	l
vSAG_27_M11 Contig 1	3	170	7459	-
vSAG_27_M11 Contig 1	172	534	7459	-
vSAG_27_M11 Contig 1	660	1268	7459	-
vSAG_27_M11 Contig 1	1272	2393	7459	Trypsin_2
vSAG_27_M11 Contig 1	2419	3027	7459	-
vSAG_27_M11 Contig 1	3038	3367	7459	-
vSAG_27_M11 Contig 1	3395	4213	7459	Lipase_3
vSAG_27_M11 Contig 1	4244	4690	7459	-
vSAG_27_M11 Contig 1	4701	5627	7459	Glyco_transf_9
vSAG_27_M11 Contig 1	5578	5805	7459	-
vSAG_27_M11 Contig 1	5805	6704	7459	-
vSAG_27_M11 Contig 1	6719	6985	7459	Glutaredoxin
vSAG_27_M11 Contig 1	6960	7103	7459	-
vSAG_27_M11 Contig 1	7100	7372	7459	-
vSAG_27_M11 Contig 1	7373	7459	7459	-
vSAG_27_M11 Contig 2	13	l
vSAG_27_M11 Contig 2	890	1072	7114	-
vSAG_27_M11 Contig 2	1153	1323	7114	-
vSAG_27_M11 Contig 2	1418	1795	7114	-
vSAG_27_M11 Contig 2	2009	2563	7114	-
vSAG_27_M11 Contig 2	2594	2860	7114	-
vSAG_27_M11 Contig 2	2848	4305	7114	GARS_A
vSAG_27_M11 Contig 2	4302	4589	7114	-
vSAG_27_M11 Contig 2	4589	4825	7114	-
vSAG_27_M11 Contig 2	4825	5196	7114	-
vSAG_27_M11 Contig 2	5240	5524	7114	-
vSAG_27_M11 Contig 2	5484	5702	7114	-
vSAG_27_M11 Contig 2	5707	6558	7114	SAICAR_synt
vSAG_27_M11 Contig 2	6801	7112	7114	AdoMet_dc
vSAG_27_N11 Contig 1	6	l
vSAG_27_N11 Contig 1	3	719	11310	Laminin_G_3
vSAG_27_N11 Contig 1	737	1138	11310	-
vSAG_27_N11 Contig 1	1153	2085	11310	-
vSAG_27_N11 Contig 1	2095	2412	11310	-
vSAG_27_N11 Contig 1	2412	4583	11310	Laminin_G_3
vSAG_27_N11 Contig 1	4620	11309	11310	Laminin_G_3
vSAG_27_H7 Contig 1	6	l
vSAG_27_H7 Contig 1	27	332	3369	DUF4035
vSAG_27_H7 Contig 1	374	724	3369	-
vSAG_27_H7 Contig 1	752	1156	3369	Phage_TTP_12
vSAG_27_H7 Contig 1	1186	1584	3369	-
vSAG_27_H7 Contig 1	1581	1757	3369	-
vSAG_27_H7 Contig 1	1868	3367	3369	-
vSAG_27_H11 Contig 2	12	l
vSAG_27_H11 Contig 2	3	83	5102	-
vSAG_27_H11 Contig 2	274	456	5102	-
vSAG_27_H11 Contig 2	453	617	5102	-
vSAG_27_H11 Contig 2	622	840	5102	-
vSAG_27_H11 Contig 2	977	1147	5102	-
vSAG_27_H11 Contig 2	1296	1541	5102	-
vSAG_27_H11 Contig 2	2271	2750	5102	-
vSAG_27_H11 Contig 2	3514	3735	5102	-
vSAG_27_H11 Contig 2	3778	4005	5102	-
vSAG_27_H11 Contig 2	4008	4259	5102	-
vSAG_27_H11 Contig 2	4363	4908	5102	-
vSAG_27_H11 Contig 2	4901	5083	5102	-
vSAG_27_H11 Contig 3	13	l
vSAG_27_H11 Contig 3	3	125	3693	-
vSAG_27_H11 Contig 3	153	491	3693	-
vSAG_27_H11 Contig 3	618	884	3693	-
vSAG_27_H11 Contig 3	902	1144	3693	PC4
vSAG_27_H11 Contig 3	1147	1254	3693	-
vSAG_27_H11 Contig 3	1217	1699	3693	-
vSAG_27_H11 Contig 3	1924	2133	3693	-
vSAG_27_H11 Contig 3	2143	2412	3693	-
vSAG_27_H11 Contig 3	2416	2589	3693	-
vSAG_27_H11 Contig 3	2591	2791	3693	-
vSAG_27_H11 Contig 3	2920	3294	3693	-
vSAG_27_H11 Contig 3	3266	3469	3693	-
vSAG_27_H11 Contig 3	3408	3692	3693	-
vSAG_88_3_B13 Contig 1	4	l
vSAG_88_3_B13 Contig 1	3	887	4059	-
vSAG_88_3_B13 Contig 1	896	2215	4059	-
vSAG_88_3_B13 Contig 1	2289	3164	4059	-
vSAG_88_3_B13 Contig 1	3173	4057	4059	-
vSAG_88_3_B13 Contig 2	6	l
vSAG_88_3_B13 Contig 2	2	562	3634	-
vSAG_88_3_B13 Contig 2	564	1025	3634	-
vSAG_88_3_B13 Contig 2	1099	1698	3634	-
vSAG_88_3_B13 Contig 2	1714	2628	3634	-
vSAG_88_3_B13 Contig 2	2869	3078	3634	-
vSAG_88_3_B13 Contig 2	3237	3632	3634	-
vSAG_88_3_B22 Contig 1	11	l
vSAG_88_3_B22 Contig 1	2	916	7135	-
vSAG_88_3_B22 Contig 1	925	1926	7135	-
vSAG_88_3_B22 Contig 1	1937	2401	7135	-
vSAG_88_3_B22 Contig 1	2411	2734	7135	-
vSAG_88_3_B22 Contig 1	2790	3746	7135	Radical_SAM
vSAG_88_3_B22 Contig 1	3764	4417	7135	-
vSAG_88_3_B22 Contig 1	4639	4947	7135	-
vSAG_88_3_B22 Contig 1	4951	5232	7135	-
vSAG_88_3_B22 Contig 1	5247	6041	7135	-
vSAG_88_3_B22 Contig 1	6061	6390	7135	-
vSAG_88_3_B22 Contig 1	6400	7134	7135	-
vSAG_88_3_B22 Contig 2	6	l
vSAG_88_3_B22 Contig 2	2	589	4102	-
vSAG_88_3_B22 Contig 2	610	1515	4102	-
vSAG_88_3_B22 Contig 2	1677	2576	4102	-
vSAG_88_3_B22 Contig 2	2632	3048	4102	-
vSAG_88_3_B22 Contig 2	3058	3807	4102	-
vSAG_88_3_B22 Contig 2	3923	4102	4102	-
vSAG_88_3_D10 Contig 1	6	l
vSAG_88_3_D10 Contig 1	3	131	7169	-
vSAG_88_3_D10 Contig 1	115	2622	7169	-
vSAG_88_3_D10 Contig 1	2622	3530	7169	-
vSAG_88_3_D10 Contig 1	3466	4548	7169	-
vSAG_88_3_D10 Contig 1	4548	7055	7169	-
vSAG_88_3_D10 Contig 1	7039	7167	7169	-
vSAG_88_3_D14 Contig 1	13	l
vSAG_88_3_D14 Contig 1	1	171	9062	-
vSAG_88_3_D14 Contig 1	171	2693	9062	-
vSAG_88_3_D14 Contig 1	2677	2826	9062	-
vSAG_88_3_D14 Contig 1	2823	4769	9062	-
vSAG_88_3_D14 Contig 1	4769	5860	9062	-
vSAG_88_3_D14 Contig 1	5864	7354	9062	-
vSAG_88_3_D14 Contig 1	7527	7805	9062	-
vSAG_88_3_D14 Contig 1	7807	8178	9062	-
vSAG_88_3_D14 Contig 1	8175	8300	9062	-
vSAG_88_3_D14 Contig 1	8293	8499	9062	-
vSAG_88_3_D14 Contig 1	8496	8801	9062	-
vSAG_88_3_D14 Contig 1	8794	8943	9062	-
vSAG_88_3_D14 Contig 1	8940	9062	9062	-
vSAG_88_3_D14 Contig 2	11	l
vSAG_88_3_D14 Contig 2	3	725	4394	-
vSAG_88_3_D14 Contig 2	739	975	4394	-
vSAG_88_3_D14 Contig 2	978	1166	4394	-
vSAG_88_3_D14 Contig 2	1166	1363	4394	-
vSAG_88_3_D14 Contig 2	1368	1751	4394	-
vSAG_88_3_D14 Contig 2	1751	1912	4394	-
vSAG_88_3_D14 Contig 2	1912	2277	4394	-
vSAG_88_3_D14 Contig 2	2277	2519	4394	-
vSAG_88_3_D14 Contig 2	2470	2910	4394	Cpn10
vSAG_88_3_D14 Contig 2	2925	3950	4394	-
vSAG_88_3_D14 Contig 2	3957	4295	4394	-
vSAG_88_3_D14 Contig 3	5	l
vSAG_88_3_D14 Contig 3	1	138	3436	-
vSAG_88_3_D14 Contig 3	263	1246	3436	-
vSAG_88_3_D14 Contig 3	2021	2287	3436	-
vSAG_88_3_D14 Contig 3	2568	3179	3436	GP88
vSAG_88_3_D14 Contig 3	3179	3343	3436	-
vSAG_88_3_G20 Contig 1	13	l
vSAG_88_3_G20 Contig 1	2	148	7414	-
vSAG_88_3_G20 Contig 1	163	1122	7414	-
vSAG_88_3_G20 Contig 1	1127	1591	7414	-
vSAG_88_3_G20 Contig 1	1667	2236	7414	-
vSAG_88_3_G20 Contig 1	2240	3145	7414	-
vSAG_88_3_G20 Contig 1	3384	3608	7414	-
vSAG_88_3_G20 Contig 1	3759	4385	7414	-
vSAG_88_3_G20 Contig 1	4329	4538	7414	-
vSAG_88_3_G20 Contig 1	4550	5251	7414	-
vSAG_88_3_G20 Contig 1	5253	5822	7414	-
vSAG_88_3_G20 Contig 1	5825	6589	7414	-
vSAG_88_3_G20 Contig 1	6600	7004	7414	-
vSAG_88_3_G20 Contig 1	7065	7412	7414	-
vSAG_88_3_G20 Contig 2	11	l
vSAG_88_3_G20 Contig 2	1	147	5810	-
vSAG_88_3_G20 Contig 2	98	337	5810	-
vSAG_88_3_G20 Contig 2	337	528	5810	-
vSAG_88_3_G20 Contig 2	528	722	5810	-
vSAG_88_3_G20 Contig 2	722	1111	5810	-
vSAG_88_3_G20 Contig 2	1113	1289	5810	-
vSAG_88_3_G20 Contig 2	1289	3793	5810	-
vSAG_88_3_G20 Contig 2	3738	3914	5810	-
vSAG_88_3_G20 Contig 2	3914	5536	5810	-
vSAG_88_3_G20 Contig 2	5624	5713	5810	-
vSAG_88_3_G20 Contig 2	5667	5810	5810	-
vSAG_88_3_H13 Contig 1	10	l
vSAG_88_3_H13 Contig 1	2	727	10996	-
vSAG_88_3_H13 Contig 1	673	1065	10996	-
vSAG_88_3_H13 Contig 1	1183	1374	10996	-
vSAG_88_3_H13 Contig 1	1374	1583	10996	-
vSAG_88_3_H13 Contig 1	1567	1899	10996	-
vSAG_88_3_H13 Contig 1	1900	2259	10996	-
vSAG_88_3_H13 Contig 1	2281	3246	10996	-
vSAG_88_3_H13 Contig 1	3259	3945	10996	-
vSAG_88_3_H13 Contig 1	3957	10889	10996	-
vSAG_88_3_H13 Contig 1	10890	10994	10996	-
vSAG_88_3_H13 Contig 2	1	l
vSAG_88_3_H13 Contig 2	2	2578	2578	-
vSAG_88_3_I14 Contig 2	2	l
vSAG_88_3_I14 Contig 2	3	2432	2555	-
vSAG_88_3_I14 Contig 2	2442	2555	2555	-
vSAG_88_3_I14 Contig 1	7	l
vSAG_88_3_I14 Contig 1	1	252	4300	-
vSAG_88_3_I14 Contig 1	252	656	4300	-
vSAG_88_3_I14 Contig 1	656	2842	4300	-
vSAG_88_3_I14 Contig 1	2919	3260	4300	-
vSAG_88_3_I14 Contig 1	3260	3424	4300	-
vSAG_88_3_I14 Contig 1	3424	4068	4300	-
vSAG_88_3_I14 Contig 1	4140	4298	4300	-
vSAG_88_3_J13 Contig 1	10	l
vSAG_88_3_J13 Contig 1	3	2849	13791	-
vSAG_88_3_J13 Contig 1	2903	9835	13791	-
vSAG_88_3_J13 Contig 1	9847	10533	13791	-
vSAG_88_3_J13 Contig 1	10546	11511	13791	-
vSAG_88_3_J13 Contig 1	11533	11892	13791	-
vSAG_88_3_J13 Contig 1	11893	12225	13791	-
vSAG_88_3_J13 Contig 1	12209	12418	13791	-
vSAG_88_3_J13 Contig 1	12418	12609	13791	-
vSAG_88_3_J13 Contig 1	12727	13119	13791	-
vSAG_88_3_J13 Contig 1	13065	13790	13791	-
vSAG_88_3_K16 Contig 1	11	l
vSAG_88_3_K16 Contig 1	2	226	7786	-
vSAG_88_3_K16 Contig 1	847	1296	7786	-
vSAG_88_3_K16 Contig 1	1266	3434	7786	-
vSAG_88_3_K16 Contig 1	3443	3784	7786	-
vSAG_88_3_K16 Contig 1	3789	4271	7786	-
vSAG_88_3_K16 Contig 1	4264	4479	7786	-
vSAG_88_3_K16 Contig 1	4479	4919	7786	Phage_lysozyme
vSAG_88_3_K16 Contig 1	4909	6774	7786	-
vSAG_88_3_K16 Contig 1	6771	7142	7786	-
vSAG_88_3_K16 Contig 1	7586	7726	7786	-
vSAG_88_3_K16 Contig 1	7727	7786	7786	-
vSAG_88_3_K16 Contig 2	8	l
vSAG_88_3_K16 Contig 2	2	226	6828	AAA_19
vSAG_88_3_K16 Contig 2	223	1728	6828	-
vSAG_88_3_K16 Contig 2	1770	2552	6828	-
vSAG_88_3_K16 Contig 2	2549	3082	6828	-
vSAG_88_3_K16 Contig 2	3075	3386	6828	-
vSAG_88_3_K16 Contig 2	3757	5202	6828	SNF2_N
vSAG_88_3_K16 Contig 2	5204	6259	6828	-
vSAG_88_3_K16 Contig 2	6261	6827	6828	-
vSAG_88_3_K16 Contig 3	3	l
vSAG_88_3_K16 Contig 3	2	103	3397	-
vSAG_88_3_K16 Contig 3	103	2565	3397	-
vSAG_88_3_K16 Contig 3	2568	3395	3397	-
vSAG_88_3_L14 Contig 1	13	l
vSAG_88_3_L14 Contig 1	131	1102	11790	-
vSAG_88_3_L14 Contig 1	1117	1566	11790	Cpn10
vSAG_88_3_L14 Contig 1	1517	1756	11790	-
vSAG_88_3_L14 Contig 1	1756	2007	11790	-
vSAG_88_3_L14 Contig 1	2007	2204	11790	-
vSAG_88_3_L14 Contig 1	2204	2371	11790	-
vSAG_88_3_L14 Contig 1	2371	2640	11790	-
vSAG_88_3_L14 Contig 1	2640	3032	11790	-
vSAG_88_3_L14 Contig 1	3032	5548	11790	-
vSAG_88_3_L14 Contig 1	5493	5669	11790	-
vSAG_88_3_L14 Contig 1	5669	8521	11790	-
vSAG_88_3_L14 Contig 1	8521	10086	11790	-
vSAG_88_3_L14 Contig 1	10086	11558	11790	Terminase_6C
vSAG_88_3_L14 Contig 2	4	l
vSAG_88_3_L14 Contig 2	3	470	2870	GP88
vSAG_88_3_L14 Contig 2	960	1211	2870	-
vSAG_88_3_L14 Contig 2	1476	2453	2870	-
vSAG_88_3_L14 Contig 2	2492	2725	2870	-
vSAG_88_3_N13 Contig 2	11	l
vSAG_88_3_N13 Contig 2	1	69	3356	-
vSAG_88_3_N13 Contig 2	107	298	3356	-
vSAG_88_3_N13 Contig 2	295	468	3356	-
vSAG_88_3_N13 Contig 2	470	706	3356	-
vSAG_88_3_N13 Contig 2	1214	1453	3356	-
vSAG_88_3_N13 Contig 2	1606	2076	3356	-
vSAG_88_3_N13 Contig 2	2076	2345	3356	-
vSAG_88_3_N13 Contig 2	2345	2551	3356	-
vSAG_88_3_N13 Contig 2	2551	2829	3356	-
vSAG_88_3_N13 Contig 2	2810	2965	3356	-
vSAG_88_3_N13 Contig 2	2904	3071	3356	-
vSAG_30_E13 Contig 1	29	l
vSAG_30_E13 Contig 1	3	1052	37461	-
vSAG_30_E13 Contig 1	1084	4155	37461	-
vSAG_30_E13 Contig 1	4250	5314	37461	-
vSAG_30_E13 Contig 1	5316	6623	37461	-
vSAG_30_E13 Contig 1	6765	7151	37461	-
vSAG_30_E13 Contig 1	7440	7634	37461	-
vSAG_30_E13 Contig 1	7687	9189	37461	-
vSAG_30_E13 Contig 1	9343	9519	37461	-
vSAG_30_E13 Contig 1	9516	9743	37461	-
vSAG_30_E13 Contig 1	9730	10059	37461	-
vSAG_30_E13 Contig 1	10060	10419	37461	-
vSAG_30_E13 Contig 1	10452	11414	37461	-
vSAG_30_E13 Contig 1	11427	12113	37461	-
vSAG_30_E13 Contig 1	12125	18466	37461	-
vSAG_30_E13 Contig 1	18467	22894	37461	-
vSAG_30_E13 Contig 1	22922	23119	37461	-
vSAG_30_E13 Contig 1	23162	23659	37461	-
vSAG_30_E13 Contig 1	23722	24300	37461	-
vSAG_30_E13 Contig 1	24297	25403	37461	-
vSAG_30_E13 Contig 1	25403	26356	37461	-
vSAG_30_E13 Contig 1	26353	26724	37461	-
vSAG_30_E13 Contig 1	26767	28506	37461	-
vSAG_30_E13 Contig 1	28521	28790	37461	-
vSAG_30_E13 Contig 1	28819	29307	37461	-
vSAG_30_E13 Contig 1	29337	29585	37461	-
vSAG_30_E13 Contig 1	29637	33305	37461	-
vSAG_30_E13 Contig 1	33310	34518	37461	-
vSAG_30_E13 Contig 1	34534	36060	37461	-
vSAG_30_E13 Contig 1	36222	37460	37461	-
vSAG_30_E13 Contig 2	8	l
vSAG_30_E13 Contig 2	3	1001	15221	DNA_pol_A_exo1
vSAG_30_E13 Contig 2	958	2016	15221	DNA_pol3_beta
vSAG_30_E13 Contig 2	2010	2402	15221	-
vSAG_30_E13 Contig 2	2402	3253	15221	-
vSAG_30_E13 Contig 2	3273	4190	15221	Toprim_2
vSAG_30_E13 Contig 2	4183	4362	15221	-
vSAG_30_E13 Contig 2	4349	5623	15221	DnaB_C
vSAG_30_E13 Contig 2	5734	15219	15221	E1_FCCH
vSAG_30_E13 Contig 3	11	l
vSAG_30_E13 Contig 3	2	2515	14064	Topoisom_I
vSAG_30_E13 Contig 3	2542	2868	14064	-
vSAG_30_E13 Contig 3	3011	3316	14064	-
vSAG_30_E13 Contig 3	3326	3787	14064	-
vSAG_30_E13 Contig 3	3807	4154	14064	-
vSAG_30_E13 Contig 3	4241	4636	14064	-
vSAG_30_E13 Contig 3	4602	6500	14064	-
vSAG_30_E13 Contig 3	6500	8341	14064	Phage_portal
vSAG_30_E13 Contig 3	8338	11613	14064	-
vSAG_30_E13 Contig 3	11456	13588	14064	PolyA_pol
vSAG_30_E13 Contig 3	13624	14064	14064	-
vSAG_30_E22 Contig 2	6	l
vSAG_30_E22 Contig 2	133	303	5722	-
vSAG_30_E22 Contig 2	435	575	5722	DUF1725
vSAG_30_E22 Contig 2	1268	1402	5722	-
vSAG_30_E22 Contig 2	1615	1794	5722	-
vSAG_30_E22 Contig 2	2475	2702	5722	-
vSAG_30_E22 Contig 2	3336	3527	5722	-
vSAG_30_E22 Contig 3	7	l
vSAG_30_E22 Contig 3	1	93	3859	-
vSAG_30_E22 Contig 3	100	612	3859	DUF1725
vSAG_30_E22 Contig 3	1463	1924	3859	-
vSAG_30_E22 Contig 3	1891	2079	3859	-
vSAG_30_E22 Contig 3	2099	2320	3859	-
vSAG_30_E22 Contig 3	2344	2727	3859	-
vSAG_30_E22 Contig 3	3355	3858	3859	RVT_1
vSAG_30_E22 Contig 4	6	l
vSAG_30_E22 Contig 4	182	361	3382	-
vSAG_30_E22 Contig 4	580	744	3382	-
vSAG_30_E22 Contig 4	722	847	3382	-
vSAG_30_E22 Contig 4	2028	2543	3382	-
vSAG_30_E22 Contig 4	2760	3164	3382	-
vSAG_30_E22 Contig 4	3244	3381	3382	-
vSAG_30_F21 Contig 1	21	l
vSAG_30_F21 Contig 1	1	261	13741	-
vSAG_30_F21 Contig 1	261	482	13741	-
vSAG_30_F21 Contig 1	514	846	13741	-
vSAG_30_F21 Contig 1	843	1484	13741	-
vSAG_30_F21 Contig 1	1532	3328	13741	SPRY
vSAG_30_F21 Contig 1	3328	5913	13741	-
vSAG_30_F21 Contig 1	5968	6258	13741	-
vSAG_30_F21 Contig 1	6267	6959	13741	-
vSAG_30_F21 Contig 1	6969	7184	13741	-
vSAG_30_F21 Contig 1	7184	7564	13741	-
vSAG_30_F21 Contig 1	7575	7799	13741	-
vSAG_30_F21 Contig 1	7799	8023	13741	-
vSAG_30_F21 Contig 1	8023	8466	13741	-
vSAG_30_F21 Contig 1	8481	9044	13741	-
vSAG_30_F21 Contig 1	9044	9697	13741	-
vSAG_30_F21 Contig 1	9703	10002	13741	-
vSAG_30_F21 Contig 1	10073	10654	13741	-
vSAG_30_F21 Contig 1	10739	11656	13741	-
vSAG_30_F21 Contig 1	11676	12257	13741	-
vSAG_30_F21 Contig 1	12295	12780	13741	-
vSAG_30_F21 Contig 1	12790	13740	13741	-
vSAG_30_F21 Contig 2	8	l
vSAG_30_F21 Contig 2	77	493	6249	Cpn10
vSAG_30_F21 Contig 2	493	831	6249	-
vSAG_30_F21 Contig 2	831	977	6249	-
vSAG_30_F21 Contig 2	977	1267	6249	-
vSAG_30_F21 Contig 2	1260	1448	6249	-
vSAG_30_F21 Contig 2	1561	4002	6249	-
vSAG_30_F21 Contig 2	4002	4679	6249	-
vSAG_30_F21 Contig 2	4679	6196	6249	Terminase_6C
vSAG_30_F21 Contig 3	6	l
vSAG_30_F21 Contig 3	3	122	3308	-
vSAG_30_F21 Contig 3	171	1169	3308	-
vSAG_30_F21 Contig 3	985	1488	3308	-
vSAG_30_F21 Contig 3	1488	2459	3308	-
vSAG_30_F21 Contig 3	2469	2978	3308	-
vSAG_30_F21 Contig 3	3093	3308	3308	-
vSAG_30_J17 Contig 1	38	l
vSAG_30_J17 Contig 1	18	161	18480	-
vSAG_30_J17 Contig 1	155	364	18480	-
vSAG_30_J17 Contig 1	351	539	18480	-
vSAG_30_J17 Contig 1	567	776	18480	-
vSAG_30_J17 Contig 1	787	990	18480	-
vSAG_30_J17 Contig 1	992	1147	18480	-
vSAG_30_J17 Contig 1	1159	1350	18480	-
vSAG_30_J17 Contig 1	1343	1552	18480	-
vSAG_30_J17 Contig 1	1560	1685	18480	-
vSAG_30_J17 Contig 1	2139	2345	18480	-
vSAG_30_J17 Contig 1	2510	2947	18480	-
vSAG_30_J17 Contig 1	2967	3311	18480	-
vSAG_30_J17 Contig 1	3316	4140	18480	DNA_ligase_A_M
vSAG_30_J17 Contig 1	4133	4486	18480	-
vSAG_30_J17 Contig 1	4487	4972	18480	-
vSAG_30_J17 Contig 1	5038	5673	18480	-
vSAG_30_J17 Contig 1	5670	5960	18480	-
vSAG_30_J17 Contig 1	5947	6702	18480	-
vSAG_30_J17 Contig 1	6775	7359	18480	ERF
vSAG_30_J17 Contig 1	7328	8098	18480	DUF3799
vSAG_30_J17 Contig 1	8108	8275	18480	-
vSAG_30_J17 Contig 1	8277	8588	18480	-
vSAG_30_J17 Contig 1	8591	10306	18480	Toprim_4
vSAG_30_J17 Contig 1	10317	10577	18480	-
vSAG_30_J17 Contig 1	10558	11205	18480	Thymidylat_synt
vSAG_30_J17 Contig 1	11207	12001	18480	-
vSAG_30_J17 Contig 1	11994	12227	18480	-
vSAG_30_J17 Contig 1	12214	12660	18480	DUF1064
vSAG_30_J17 Contig 1	12657	12794	18480	-
vSAG_30_J17 Contig 1	12795	14657	18480	Ribonuc_red_lgC
vSAG_30_J17 Contig 1	14683	15081	18480	-
vSAG_30_J17 Contig 1	15108	15299	18480	-
vSAG_30_J17 Contig 1	15459	15590	18480	-
vSAG_30_J17 Contig 1	15602	15979	18480	-
vSAG_30_J17 Contig 1	15981	16178	18480	-
vSAG_30_J17 Contig 1	16178	17923	18480	-
vSAG_30_J17 Contig 1	17925	18254	18480	-
vSAG_30_J17 Contig 1	18261	18479	18480	-
vSAG_30_J17 Contig 2	11	l
vSAG_30_J17 Contig 2	2	1285	17011	-
vSAG_30_J17 Contig 2	1297	10149	17011	-
vSAG_30_J17 Contig 2	10156	11190	17011	-
vSAG_30_J17 Contig 2	11218	11382	17011	-
vSAG_30_J17 Contig 2	11396	11677	17011	-
vSAG_30_J17 Contig 2	11683	12045	17011	-
vSAG_30_J17 Contig 2	12045	12389	17011	SNase
vSAG_30_J17 Contig 2	12390	12890	17011	-
vSAG_30_J17 Contig 2	12887	16030	17011	MAM
vSAG_30_J17 Contig 2	16033	16524	17011	-
vSAG_30_J17 Contig 2	16536	17009	17011	-
vSAG_30_J17 Contig 3	12	l
vSAG_30_J17 Contig 3	2	88	9869	-
vSAG_30_J17 Contig 3	94	336	9869	-
vSAG_30_J17 Contig 3	381	773	9869	-
vSAG_30_J17 Contig 3	778	1605	9869	-
vSAG_30_J17 Contig 3	1638	1922	9869	-
vSAG_30_J17 Contig 3	1897	2118	9869	-
vSAG_30_J17 Contig 3	2118	2699	9869	-
vSAG_30_J17 Contig 3	2653	2928	9869	-
vSAG_30_J17 Contig 3	2928	5141	9869	-
vSAG_30_J17 Contig 3	5144	7564	9869	-
vSAG_30_J17 Contig 3	7595	8809	9869	-
vSAG_30_J17 Contig 3	8829	9869	9869	-
vSAG_30_J17 Contig 4	5	l
vSAG_30_J17 Contig 4	1	483	8645	-
vSAG_30_J17 Contig 4	572	1396	8645	-
vSAG_30_J17 Contig 4	1455	2159	8645	-
vSAG_30_J17 Contig 4	2164	3657	8645	-
vSAG_30_J17 Contig 4	3661	8643	8645	-
vSAG_30_J17 Contig 5	9	l
vSAG_30_J17 Contig 5	250	471	2864	-
vSAG_30_J17 Contig 5	928	1194	2864	-
vSAG_30_J17 Contig 5	1225	1386	2864	-
vSAG_30_J17 Contig 5	1397	1660	2864	-
vSAG_30_J17 Contig 5	1733	1861	2864	-
vSAG_30_J17 Contig 5	1911	2396	2864	-
vSAG_30_J17 Contig 5	2393	2488	2864	-
vSAG_30_J17 Contig 5	2475	2708	2864	-
vSAG_30_J17 Contig 5	2701	2862	2864	-
vSAG_30_N21 Contig 1	6	l
vSAG_30_N21 Contig 1	2	1096	5620	-
vSAG_30_N21 Contig 1	1096	1632	5620	-
vSAG_30_N21 Contig 1	1686	2414	5620	-
vSAG_30_N21 Contig 1	2424	2975	5620	-
vSAG_30_N21 Contig 1	3049	4185	5620	-
vSAG_30_N21 Contig 1	4187	5620	5620	-
vSAG_30_N21 Contig 3	5	l
vSAG_30_N21 Contig 3	88	738	3385	-
vSAG_30_N21 Contig 3	738	1025	3385	-
vSAG_30_N21 Contig 3	1034	1567	3385	-
vSAG_30_N21 Contig 3	1619	2116	3385	-
vSAG_30_N21 Contig 3	2116	3384	3385	-
vSAG_30_N21 Contig 4	6	l
vSAG_30_N21 Contig 4	2	466	2824	-
vSAG_30_N21 Contig 4	466	1614	2824	Laminin_G_3
vSAG_30_N21 Contig 4	1614	1847	2824	-
vSAG_30_N21 Contig 4	1840	2232	2824	-
vSAG_30_N21 Contig 4	2246	2491	2824	-
vSAG_30_N21 Contig 4	2593	2823	2824	-
vSAG_30_N21 Contig 2	4	l
vSAG_30_N21 Contig 2	1	117	3636	-
vSAG_30_N21 Contig 2	107	3412	3636	-
vSAG_30_N21 Contig 2	3364	3477	3636	-
vSAG_30_N21 Contig 2	3502	3636	3636	-
vSAG_86_3_D22 Contig 1	19	l
vSAG_86_3_D22 Contig 1	2	4093	17807	-
vSAG_86_3_D22 Contig 1	4093	5490	17807	Laminin_G_3
vSAG_86_3_D22 Contig 1	5493	5984	17807	-
vSAG_86_3_D22 Contig 1	5981	6415	17807	NUDIX
vSAG_86_3_D22 Contig 1	6403	7830	17807	T4-gp15_tss
vSAG_86_3_D22 Contig 1	7830	8327	17807	GIY-YIG
vSAG_86_3_D22 Contig 1	8343	8537	17807	-
vSAG_86_3_D22 Contig 1	8534	9712	17807	-
vSAG_86_3_D22 Contig 1	9809	10261	17807	-
vSAG_86_3_D22 Contig 1	10258	10608	17807	-
vSAG_86_3_D22 Contig 1	10877	11593	17807	-
vSAG_86_3_D22 Contig 1	12497	12919	17807	PDDEXK_5
vSAG_86_3_D22 Contig 1	13411	13926	17807	-
vSAG_86_3_D22 Contig 1	13953	14240	17807	-
vSAG_86_3_D22 Contig 1	14237	14506	17807	-
vSAG_86_3_D22 Contig 1	14632	15354	17807	-
vSAG_86_3_D22 Contig 1	15605	15874	17807	-
vSAG_86_3_D22 Contig 1	16043	16792	17807	-
vSAG_86_3_D22 Contig 1	17490	17807	17807	-
vSAG_86_3_D22 Contig 2	8	l
vSAG_86_3_D22 Contig 2	3	839	9938	ATP-cone
vSAG_86_3_D22 Contig 2	859	1299	9938	-
vSAG_86_3_D22 Contig 2	1303	5679	9938	-
vSAG_86_3_D22 Contig 2	5716	6384	9938	-
vSAG_86_3_D22 Contig 2	6421	7302	9938	-
vSAG_86_3_D22 Contig 2	7306	7617	9938	-
vSAG_86_3_D22 Contig 2	7619	8989	9938	-
vSAG_86_3_D22 Contig 2	9465	9938	9938	-
vSAG_86_3_D22 Contig 3	20	l
vSAG_86_3_D22 Contig 3	2	1057	9156	NAPRTase
vSAG_86_3_D22 Contig 3	1027	1719	9156	-
vSAG_86_3_D22 Contig 3	1712	2479	9156	-
vSAG_86_3_D22 Contig 3	2490	2669	9156	-
vSAG_86_3_D22 Contig 3	2666	2893	9156	-
vSAG_86_3_D22 Contig 3	2880	3152	9156	-
vSAG_86_3_D22 Contig 3	3149	3577	9156	-
vSAG_86_3_D22 Contig 3	3552	4040	9156	Macro
vSAG_86_3_D22 Contig 3	4025	4225	9156	-
vSAG_86_3_D22 Contig 3	4258	4539	9156	-
vSAG_86_3_D22 Contig 3	4539	5237	9156	-
vSAG_86_3_D22 Contig 3	5221	5724	9156	DNA_pol3_alpha
vSAG_86_3_D22 Contig 3	5735	6145	9156	-
vSAG_86_3_D22 Contig 3	6126	6488	9156	-
vSAG_86_3_D22 Contig 3	6490	6825	9156	-
vSAG_86_3_D22 Contig 3	6825	7604	9156	-
vSAG_86_3_D22 Contig 3	7597	8529	9156	AAA
vSAG_86_3_D22 Contig 3	8543	8821	9156	-
vSAG_86_3_D22 Contig 3	8823	9035	9156	-
vSAG_86_3_D22 Contig 3	9044	9154	9156	-
vSAG_86_3_D22 Contig 5	7	l
vSAG_86_3_D22 Contig 5	2	361	3535	-
vSAG_86_3_D22 Contig 5	358	960	3535	-
vSAG_86_3_D22 Contig 5	957	1160	3535	-
vSAG_86_3_D22 Contig 5	1197	1538	3535	-
vSAG_86_3_D22 Contig 5	1535	2158	3535	-
vSAG_86_3_D22 Contig 5	2211	2933	3535	PhoH
vSAG_86_3_D22 Contig 5	3164	3535	3535	-
vSAG_86_3_D22 Contig 6	1	l
vSAG_86_3_D22 Contig 6	291	3071	3071	-
vSAG_86_3_D22 Contig 7	4	l
vSAG_86_3_D22 Contig 7	164	562	2517	-
vSAG_86_3_D22 Contig 7	589	1338	2517	-
vSAG_86_3_D22 Contig 7	1384	2142	2517	-
vSAG_86_3_D22 Contig 7	2188	2517	2517	-
vSAG_86_3_F4 Contig 1	12	l
vSAG_86_3_F4 Contig 1	1	546	9451	-
vSAG_86_3_F4 Contig 1	543	1169	9451	-
vSAG_86_3_F4 Contig 1	1169	1768	9451	-
vSAG_86_3_F4 Contig 1	1783	2070	9451	Phage_tail_APC
vSAG_86_3_F4 Contig 1	2110	4272	9451	-
vSAG_86_3_F4 Contig 1	4269	4850	9451	-
vSAG_86_3_F4 Contig 1	4668	5183	9451	-
vSAG_86_3_F4 Contig 1	5180	7342	9451	-
vSAG_86_3_F4 Contig 1	7382	7669	9451	Phage_tail_APC
vSAG_86_3_F4 Contig 1	7684	8283	9451	-
vSAG_86_3_F4 Contig 1	8283	8909	9451	-
vSAG_86_3_F4 Contig 1	8906	9451	9451	-
vSAG_86_3_F4 Contig 2	4	l
vSAG_86_3_F4 Contig 2	1	444	2710	-
vSAG_86_3_F4 Contig 2	444	1559	2710	-
vSAG_86_3_F4 Contig 2	1578	2441	2710	-
vSAG_86_3_F4 Contig 2	2456	2710	2710	-
vSAG_86_3_F4 Contig 3	2	l
vSAG_86_3_F4 Contig 3	3	2345	2703	-
vSAG_86_3_F4 Contig 3	2361	2690	2703	-
vSAG_86_3_K18 Contig 2	2	l
vSAG_86_3_K18 Contig 2	3	3065	4361	-
vSAG_86_3_K18 Contig 2	3065	4360	4361	Laminin_G_3
vSAG_86_3_K18 Contig 1	11	l
vSAG_86_3_K18 Contig 1	2	460	6784	GIY-YIG
vSAG_86_3_K18 Contig 1	476	670	6784	-
vSAG_86_3_K18 Contig 1	667	1845	6784	-
vSAG_86_3_K18 Contig 1	1942	2394	6784	-
vSAG_86_3_K18 Contig 1	2391	2741	6784	-
vSAG_86_3_K18 Contig 1	3010	3726	6784	-
vSAG_86_3_K18 Contig 1	4630	5052	6784	PDDEXK_5
vSAG_86_3_K18 Contig 1	5544	6059	6784	-
vSAG_86_3_K18 Contig 1	6086	6373	6784	-
vSAG_86_3_K18 Contig 1	6370	6639	6784	-
vSAG_86_3_K18 Contig 1	6606	6782	6784	-
vSAG_86_3_K18 Contig 3	4	l
vSAG_86_3_K18 Contig 3	3	68	2631	-
vSAG_86_3_K18 Contig 3	68	445	2631	GPW_gp25
vSAG_86_3_K18 Contig 3	576	809	2631	-
vSAG_86_3_K18 Contig 3	1010	2629	2631	-
