# Supplementary material for: Into the Dark: Exploring the Deep Ocean with Single-Virus Genomics
Source: Viruses. 2022 Jul 21;14(7):1589. doi: 10.3390/v14071589 (PMC9322844; doi:10.3390/v14071589)
Supplement: Supplementary file 1 [file viruses-14-01589-s001.zip › TableS3-AMGs.xlsx]

## Sheet: TableS3-AMGs
Contig	gene_id	gene_description	category	module
DvSAG_27-M11 Contig 1	GT9	GT9 lipopolysaccharide N-acetylglucosaminyltransferase (EC 2.4.1.56); heptosyltransferase (EC 2.4.-.-).	carbon utilization	GlycosylTransferases
DvSAG_27-M11 Contig 2	K01945	phosphoribosylamine--glycine ligase [EC:6.3.4.13] [RN:R04144]	MISC	Inosine monophosphate biosynthesis, PRPP + glutamine => IMP
DvSAG_30-J17 Contig 1	K00560	thymidylate synthase [EC:2.1.1.45] [RN:R02101]	MISC	Pyrimidine deoxyribonuleotide biosynthesis, CDP/CTP => dCDP/dCTP,dTDP/dTTP
