# Supplementary material for: Into the Dark: Exploring the Deep Ocean with Single-Virus Genomics
Source: Viruses. 2022 Jul 21;14(7):1589. doi: 10.3390/v14071589 (PMC9322844; doi:10.3390/v14071589)
Supplement: Supplementary file 1 [file viruses-14-01589-s001.zip › TableS4-Relatedviruses.xlsx]

## Sheet: Table S4. Related viruses
vSAG	IMGVR	Hits	Sim	Qcov	vSAG prots	%Shared proteins
vSAG_88_3_J13	Ga0114898_1000086	6	89.1917	99.2564	10	60
vSAG_88_3_J13	Ga0114905_1000416	6	89.455	98.9595	10	60
vSAG_88_3_J13	Ga0208179_1000337	6	89.155	99.7983	10	60
vSAG_88_3_K16	Station82_SUR_COMBINED_FINAL_NODE_794_length_35284_cov_51,025490	13	96.8	99.7999	22	59.0909
vSAG_86_3_F4	Ga0114910_1004553	10	100	100	18	55.5556
vSAG_86_3_F4	Ga0208029_1003315	10	100	99.6415	18	55.5556
vSAG_86_3_F4	Ga0208030_1004719	10	99.918	99.6415	18	55.5556
vSAG_86_3_F4	Ga0208179_1003124	10	100	100	18	55.5556
vSAG_86_3_F4	Ga0208182_1003560	10	100	100	18	55.5556
vSAG_86_3_F4	Ga0208183_1002629	10	100	99.6415	18	55.5556
vSAG_86_3_F4	Ga0208315_1004007	10	100	99.6415	18	55.5556
vSAG_86_3_F4	Ga0208449_1003888	10	99.884	99.6415	18	55.5556
vSAG_86_3_F4	Ga0208684_1004374	10	100	99.6415	18	55.5556
vSAG_86_3_F4	Ga0208813_1004390	10	99.901	100	18	55.5556
vSAG_88_3_H13	Ga0114898_1000086	6	89.1917	99.2564	11	54.5455
vSAG_88_3_H13	Ga0114905_1000416	6	89.455	98.9595	11	54.5455
vSAG_88_3_H13	Ga0208179_1000337	6	89.155	99.7983	11	54.5455
vSAG_86_3_K18	Station137_MES_COMBINED_FINAL_NODE_195_length_195163_cov_4,610898	9	99.5	99.2354	17	52.9412
vSAG_27_A8	Ga0209349_1000808	15	100	99.4173	29	51.7241
vSAG_88_3_K16	Ga0222715_10000168	11	92.45	99.079	22	50
vSAG_88_3_K16	Ga0222716_10000304	11	92.45	99.079	22	50
vSAG_88_3_K16	Ga0222718_10000340	11	92.45	99.079	22	50
vSAG_88_3_K16	Station137_DCM_ALL_assembly_NODE_96_length_39036_cov_5,157949	11	92.8782	99.7601	22	50
vSAG_88_3_L14	Ga0209602_1000028	8	85.45	99.5809	17	47.0588
vSAG_88_3_K16	Ga0208434_1000020	10	87.834	97.8041	22	45.4545
vSAG_88_3_K16	Ga0208667_1000006	10	87.834	97.8041	22	45.4545
vSAG_88_3_N13	Ga0209337_1004117	5	96.602	98.2835	11	45.4545
vSAG_27_A8	Ga0133547_10011998	13	89.9254	99.1524	29	44.8276
vSAG_27_A8	Ga0209128_1003591	13	99.5577	100.02	29	44.8276
vSAG_86_3_F4	Ga0098036_1003041	8	84.385	97.5714	18	44.4444
vSAG_86_3_F4	Ga0180120_10001680	8	86.0525	97.5806	18	44.4444
vSAG_86_3_F4	Ga0209337_1011007	8	82.5975	98.8346	18	44.4444
vSAG_27_A8	Ga0209756_1002819	12	100	99.2717	29	41.3793
vSAG_86_3_K18	Ga0211646_10000675	7	99.85	100	17	41.1765
vSAG_88_3_B22	Ga0315338_1000625	7	94.3571	99.8228	17	41.1765
vSAG_88_3_L14	Ga0183755_1001579	7	91.4314	99.2962	17	41.1765
vSAG_88_3_L14	Ga0208669_1000277	7	96.45	100.206	17	41.1765
vSAG_88_3_L14	Ga0209992_10004546	7	90.5414	99.137	17	41.1765
vSAG_88_3_K16	DelMOSum2011_c10000878	9	99.1022	99.8354	22	40.9091
vSAG_88_3_K16	DelMOWin2010_c10001177	9	99.3278	100	22	40.9091
vSAG_30_F21	Ga0115658_1002753	14	94.3214	99.534	35	40
vSAG_30_F21	Ga0115660_1002314	14	94.4171	99.534	35	40
vSAG_30_F21	Ga0118713_1002753	14	94.3214	99.534	35	40
vSAG_88_3_B13	Ga0068471_1088135	4	93.605	99.359	10	40
vSAG_88_3_B13	Ga0068471_1091975	4	94.775	99.8366	10	40
vSAG_88_3_B13	Ga0068471_1113703	4	88.1075	100.248	10	40
vSAG_88_3_B13	Ga0068471_1133622	4	95.3525	100	10	40
vSAG_88_3_B13	Ga0068471_1133767	4	84.3175	96.4837	10	40
vSAG_88_3_B13	Ga0068471_1134984	4	87.3075	100.048	10	40
vSAG_88_3_B13	Ga0068482_1173558	4	91.6225	99.7667	10	40
vSAG_88_3_B13	Ga0068482_1173560	4	91.6675	99.4975	10	40
vSAG_88_3_B13	Ga0068493_10193493	4	88.1725	99.4696	10	40
vSAG_88_3_B13	Ga0068503_10205413	4	86.7225	97.4477	10	40
vSAG_88_3_B13	Ga0068503_10249624	4	92.9725	99.8366	10	40
vSAG_88_3_B13	Ga0068503_10251268	4	90.81	100	10	40
vSAG_88_3_B13	Ga0068503_10281206	4	90.5125	98.2564	10	40
vSAG_88_3_B13	Ga0068503_10296462	4	89.7225	99.1007	10	40
vSAG_88_3_B13	Ga0068503_10306561	4	86.61	99.0814	10	40
vSAG_88_3_B13	Ga0068503_10356955	4	88.075	99.8366	10	40
vSAG_88_3_B13	Ga0101728_102293	4	86.525	99.4199	10	40
vSAG_88_3_B13	Ga0105018_1005051	4	90.575	99.4975	10	40
vSAG_88_3_B13	Ga0183757_1003692	4	90.305	100.348	10	40
vSAG_88_3_B13	Ga0208029_1002261	4	91.4825	99.7857	10	40
vSAG_88_3_B13	Ga0208029_1002439	4	91.9525	99.7305	10	40
vSAG_88_3_B13	Ga0208029_1002878	4	95.84	100	10	40
vSAG_88_3_B13	Ga0208030_1001602	4	88.2125	97.7462	10	40
vSAG_88_3_B13	Ga0208180_1002220	4	87.2075	99	10	40
vSAG_88_3_B13	Ga0208182_1003551	4	96.005	100	10	40
vSAG_88_3_B13	Ga0208449_1005318	4	95.7875	100	10	40
vSAG_88_3_B13	Ga0208450_1004448	4	96.005	100	10	40
vSAG_88_3_B13	Ga0208790_1003669	4	93.06	100.165	10	40
vSAG_88_3_B13	Ga0208919_1002566	4	87.1025	98.4356	10	40
vSAG_88_3_B13	Ga0208920_1000521	4	93.06	100.165	10	40
vSAG_88_3_B13	Ga0208920_1000863	4	89.33	99.0956	10	40
vSAG_88_3_B13	Ga0209128_1005140	4	93.06	100.165	10	40
vSAG_88_3_B13	Ga0209644_1000570	4	86.78	100.296	10	40
vSAG_88_3_B13	Ga0209757_10001879	4	87.13	99.276	10	40
vSAG_88_3_B13	Ga0257121_1005772	4	90.96	100.815	10	40
vSAG_88_3_B13	Ga0310124_10013258	4	95.0775	99.6212	10	40
vSAG_88_3_B13	PicMicro_10023004	4	97.7025	100	10	40
vSAG_88_3_J13	Ga0211715_10000343	4	89.1425	99.2306	10	40
vSAG_88_3_J13	Ga0310344_10000827	4	89.2625	100.156	10	40
vSAG_88_3_J13	GCA_003498445,1	4	91.8725	100.078	10	40
vSAG_27_A8	Ga0209128_1000062	11	93.1927	100.187	29	37.931
vSAG_27_A8	Ga0209128_1002270	11	100	100	29	37.931
vSAG_27_A8	Ga0209349_1000648	11	100	100	29	37.931
vSAG_27_A8	Ga0209756_1003379	11	100	100	29	37.931
vSAG_27_A8	Station72_DCM_ALL_assembly_NODE_7_length_138316_cov_9,370423	11	89.4627	99.674	29	37.931
vSAG_88_3_D14	Ga0208030_1000229	11	94.7073	99.1604	29	37.931
vSAG_88_3_D14	Ga0209128_1001554	11	91.3164	98.5034	29	37.931
vSAG_27_D11	Ga0105020_1002715	12	90.4175	97.3608	32	37.5
vSAG_27_D11	Ga0117902_1000115	12	90.4175	97.3608	32	37.5
vSAG_27_D11	Ga0118714_1000115	12	90.4175	97.3608	32	37.5
vSAG_88_3_G20	Ga0068502_1122370	9	94.6778	99.6207	24	37.5
vSAG_88_3_G20	Ga0208157_1000087	9	88.0544	98.9229	24	37.5
vSAG_88_3_G20	Ga0208157_1000159	9	88.0544	98.9229	24	37.5
vSAG_88_3_G20	Ga0208669_1000277	9	92.5011	99.7762	24	37.5
vSAG_86_3_D22	Station137_MES_COMBINED_FINAL_NODE_195_length_195163_cov_4,610898	22	98.8914	99.6908	59	37.2881
vSAG_88_3_H13	Ga0211715_10000343	4	89.1425	99.2306	11	36.3636
vSAG_88_3_H13	Ga0310344_10000827	4	89.2625	100.156	11	36.3636
vSAG_88_3_H13	GCA_003498445,1	4	91.8725	100.078	11	36.3636
vSAG_88_3_K16	DelMOSum2010_c10005757	8	99.6388	100	22	36.3636
vSAG_88_3_K16	Station109_DCM_ALL_assembly_NODE_67_length_54077_cov_21,182555	8	87.445	99.1824	22	36.3636
vSAG_88_3_B22	Ga0114898_1002195	6	95.0583	99.3958	17	35.2941
vSAG_88_3_B22	Ga0114899_1002338	6	95.29	99.3958	17	35.2941
vSAG_88_3_B22	Ga0114906_1002279	6	95.1617	99.3958	17	35.2941
vSAG_88_3_B22	Ga0208934_1001097	6	91.6083	99.8925	17	35.2941
vSAG_88_3_B22	Station72_DCM_ALL_assembly_NODE_425_length_30490_cov_171,881748	6	92.29	99.4579	17	35.2941
vSAG_88_3_L14	Ga0068471_1167481	6	91.275	99.2232	17	35.2941
vSAG_88_3_L14	Ga0068503_10185264	6	90.1417	100.678	17	35.2941
vSAG_88_3_L14	Ga0114932_10007860	6	92.7267	100.311	17	35.2941
vSAG_88_3_L14	Ga0115651_1003154	6	90.935	98.9405	17	35.2941
vSAG_88_3_L14	Ga0118717_1003154	6	90.935	98.9405	17	35.2941
vSAG_88_3_L14	Ga0163180_10000396	6	83.6767	99.9462	17	35.2941
vSAG_88_3_L14	Ga0183748_1000392	6	87.9583	99.3714	17	35.2941
vSAG_88_3_L14	Ga0183748_1000721	6	88.985	97.6281	17	35.2941
vSAG_88_3_L14	Ga0183755_1000858	6	83.615	99.8612	17	35.2941
vSAG_88_3_L14	Ga0208180_1001851	6	88.955	100.324	17	35.2941
vSAG_88_3_L14	Ga0208434_1001300	6	95.8533	100.26	17	35.2941
vSAG_88_3_L14	Ga0208553_1000814	6	89.2967	99.8867	17	35.2941
vSAG_88_3_L14	Ga0208684_1005450	6	91.075	99.2872	17	35.2941
vSAG_88_3_L14	Ga0209047_1002769	6	88.8217	100.446	17	35.2941
vSAG_88_3_L14	Ga0209362_1002879	6	90.0467	100.431	17	35.2941
vSAG_88_3_L14	Ga0209535_1001698	6	88.1483	99.1657	17	35.2941
vSAG_88_3_L14	Ga0209667_1001129	6	88.9717	100.431	17	35.2941
vSAG_88_3_L14	Ga0209992_10011855	6	90.475	100.34	17	35.2941
vSAG_27_A8	Ga0115650_1011479	10	88.84	99.7955	29	34.4828
vSAG_27_A8	Ga0118718_1011479	10	88.84	99.7955	29	34.4828
vSAG_27_A8	Ga0208433_1000248	10	86.822	97.9683	29	34.4828
vSAG_27_A8	Ga0209434_1002846	10	100	100	29	34.4828
vSAG_27_A8	Ga0209434_1003753	10	99.817	100.026	29	34.4828
vSAG_27_A8	JGI25129J35166_1000877	10	100	100	29	34.4828
vSAG_27_A8	JGI25129J35166_1002671	10	99.976	100	29	34.4828
vSAG_88_3_D14	Ga0114900_1002178	10	95.751	99.6231	29	34.4828
vSAG_88_3_D14	Ga0114909_1001486	10	95.825	99.5838	29	34.4828
vSAG_88_3_D14	KVWGV2_10026321	10	90.659	99.5602	29	34.4828
vSAG_86_3_F4	Ga0070749_10001491	6	85.3567	98.3045	18	33.3333
vSAG_86_3_F4	Ga0114899_1002399	6	81.02	98.7179	18	33.3333
vSAG_86_3_F4	Ga0114912_1003065	6	94.9033	100	18	33.3333
vSAG_86_3_F4	Ga0181404_1000372	6	82.7967	99.6116	18	33.3333
vSAG_86_3_F4	Ga0181423_1005184	6	84.37	97.7011	18	33.3333
vSAG_86_3_F4	Ga0208644_1005382	6	82.1233	98.2456	18	33.3333
vSAG_88_3_G20	Ga0068471_1133622	8	88.7138	100.117	24	33.3333
vSAG_88_3_G20	Ga0068471_1133767	8	96.6063	100.168	24	33.3333
vSAG_88_3_G20	Ga0183748_1000721	8	86.9225	99.6703	24	33.3333
vSAG_88_3_G20	Ga0208032_1001341	8	87.5225	100.069	24	33.3333
vSAG_88_3_G20	Ga0208158_1000717	8	86.52	98.0851	24	33.3333
vSAG_88_3_G20	Ga0208434_1001300	8	91.5162	99.7483	24	33.3333
vSAG_88_3_G20	Ga0209360_1001430	8	90.225	100.198	24	33.3333
vSAG_88_3_G20	Ga0209667_1001129	8	90.21	100.198	24	33.3333
vSAG_88_3_K16	Ga0075468_10002260	7	94.0414	100	22	31.8182
vSAG_88_3_K16	Ga0208545_1002772	7	94.0657	100	22	31.8182
vSAG_88_3_K16	Ga0209645_1000044	7	86.3457	99.7991	22	31.8182
vSAG_88_3_K16	Ga0222719_10001264	7	91.1057	98.5527	22	31.8182
vSAG_88_3_K16	JGI25132J35274_1000009	7	86.37	99.6775	22	31.8182
vSAG_88_3_K16	Station100_SUR_ALL_assembly_NODE_193_length_40515_cov_4,693327_1	7	85.1586	99.4922	22	31.8182
vSAG_88_3_K16	Station36_DCM_ALL_assembly_NODE_91_length_41586_cov_22,705906	7	85.0671	99.5515	22	31.8182
vSAG_88_3_K16	Station72_MES_ALL_assembly_NODE_364_length_42652_cov_14,613283_1	7	85.0586	99.5515	22	31.8182
vSAG_30_F21	Ga0098061_1002728	11	95.3236	99.5186	35	31.4286
vSAG_27_D11	Ga0115651_1005780	10	92.987	98.6885	32	31.25
vSAG_27_D11	Ga0118717_1005780	10	92.987	98.6885	32	31.25
vSAG_27_A8	Ga0115650_1003561	9	88.4644	99.3902	29	31.0345
vSAG_27_A8	Ga0118718_1003561	9	88.4644	99.3902	29	31.0345
vSAG_88_3_D14	Ga0114906_1002107	9	95.54	99.5152	29	31.0345
vSAG_88_3_D14	Ga0208790_1005088	9	92.4489	98.708	29	31.0345
vSAG_88_3_B13	DelMOSum2010_c10009732	3	86.9233	100.83	10	30
vSAG_88_3_B13	Ga0063042_102625	3	86.8167	100.549	10	30
vSAG_88_3_B13	Ga0066376_10017710	3	90.6	100.11	10	30
vSAG_88_3_B13	Ga0066829_10003157	3	95.3733	100	10	30
vSAG_88_3_B13	Ga0066842_10001051	3	90.7167	99.4709	10	30
vSAG_88_3_B13	Ga0066849_10001430	3	82.1967	97.9056	10	30
vSAG_88_3_B13	Ga0068470_1081711	3	93.9633	100	10	30
vSAG_88_3_B13	Ga0068470_1109147	3	84.0567	99.8893	10	30
vSAG_88_3_B13	Ga0068471_1059740	3	81.5633	100.11	10	30
vSAG_88_3_B13	Ga0068471_1062303	3	87.67	100.331	10	30
vSAG_88_3_B13	Ga0068471_1079778	3	84.1633	100.107	10	30
vSAG_88_3_B13	Ga0068471_1087873	3	93.9733	100	10	30
vSAG_88_3_B13	Ga0068471_1090634	3	85.4033	100.107	10	30
vSAG_88_3_B13	Ga0068471_1095471	3	93.78	99.7835	10	30
vSAG_88_3_B13	Ga0068471_1095510	3	94.14	100	10	30
vSAG_88_3_B13	Ga0068471_1095818	3	94.24	100	10	30
vSAG_88_3_B13	Ga0068471_1103810	3	94.5067	100	10	30
vSAG_88_3_B13	Ga0068471_1103899	3	84.1833	100.331	10	30
vSAG_88_3_B13	Ga0068471_1105897	3	95.2167	99.7821	10	30
vSAG_88_3_B13	Ga0068471_1105996	3	83.6567	99.8019	10	30
vSAG_88_3_B13	Ga0068471_1120620	3	85.9833	100.331	10	30
vSAG_88_3_B13	Ga0068471_1152177	3	93.09	99.4709	10	30
vSAG_88_3_B13	Ga0068471_1169928	3	83.7033	98.1088	10	30
vSAG_88_3_B13	Ga0068471_1200001	3	85.2767	100.331	10	30
vSAG_88_3_B13	Ga0068478_1119448	3	94.4333	99.7821	10	30
vSAG_88_3_B13	Ga0068481_1143373	3	93.6967	97.4961	10	30
vSAG_88_3_B13	Ga0068481_1211353	3	84.2267	98.6849	10	30
vSAG_88_3_B13	Ga0068481_1374247	3	87.1167	97.0041	10	30
vSAG_88_3_B13	Ga0068482_1176090	3	92.2633	99.33	10	30
vSAG_88_3_B13	Ga0068482_1241087	3	94.9833	99.7821	10	30
vSAG_88_3_B13	Ga0068499_1083346	3	85.6433	99.8918	10	30
vSAG_88_3_B13	Ga0068500_1140273	3	91.7567	100	10	30
vSAG_88_3_B13	Ga0068502_1122370	3	82.7333	98.341	10	30
vSAG_88_3_B13	Ga0068502_1154560	3	85.8933	99.8953	10	30
vSAG_88_3_B13	Ga0068502_1158991	3	83.6333	98.1036	10	30
vSAG_88_3_B13	Ga0068503_10175859	3	95.7067	100	10	30
vSAG_88_3_B13	Ga0068503_10175861	3	92.1933	99.548	10	30
vSAG_88_3_B13	Ga0068503_10176015	3	91.91	99.4709	10	30
vSAG_88_3_B13	Ga0068503_10182408	3	91.08	99.33	10	30
vSAG_88_3_B13	Ga0068503_10182409	3	84.7267	100.331	10	30
vSAG_88_3_B13	Ga0068503_10189452	3	87.6033	97.812	10	30
vSAG_88_3_B13	Ga0068503_10195603	3	91.2867	100.22	10	30
vSAG_88_3_B13	Ga0068503_10196485	3	91.48	99.33	10	30
vSAG_88_3_B13	Ga0068503_10196487	3	92.85	99.33	10	30
vSAG_88_3_B13	Ga0068503_10198128	3	88.2667	99.4709	10	30
vSAG_88_3_B13	Ga0068503_10208072	3	86.2833	99.6909	10	30
vSAG_88_3_B13	Ga0068503_10209801	3	92.68	99.548	10	30
vSAG_88_3_B13	Ga0068503_10218711	3	83.5267	97.9486	10	30
vSAG_88_3_B13	Ga0068503_10232888	3	86.1333	97.8874	10	30
vSAG_88_3_B13	Ga0068503_10248868	3	91.31	99.33	10	30
vSAG_88_3_B13	Ga0068503_10256703	3	95.7	99.7821	10	30
vSAG_88_3_B13	Ga0068503_10282104	3	89.8833	100.113	10	30
vSAG_88_3_B13	Ga0068503_10282132	3	89.61	97.4739	10	30
vSAG_88_3_B13	Ga0068503_10289421	3	84.69	100.33	10	30
vSAG_88_3_B13	Ga0068503_10306558	3	83.6933	98.6298	10	30
vSAG_88_3_B13	Ga0068503_10306563	3	88.4233	98.1088	10	30
vSAG_88_3_B13	Ga0068503_10306605	3	83.3633	98.8661	10	30
vSAG_88_3_B13	Ga0068503_10441934	3	85.6433	99.5806	10	30
vSAG_88_3_B13	Ga0070752_1003166	3	82.3767	99.789	10	30
vSAG_88_3_B13	Ga0070752_1005562	3	82.8667	99.6198	10	30
vSAG_88_3_B13	Ga0070754_10000221	3	84.24	98.8198	10	30
vSAG_88_3_B13	Ga0070754_10009198	3	86.1233	95.3395	10	30
vSAG_88_3_B13	Ga0070754_10011269	3	88.7533	97.508	10	30
vSAG_88_3_B13	Ga0073579_1190315	3	82.65	95.6899	10	30
vSAG_88_3_B13	Ga0098036_1003377	3	87.4933	100.281	10	30
vSAG_88_3_B13	Ga0098051_1003466	3	86.91	98.4256	10	30
vSAG_88_3_B13	Ga0099849_1001403	3	90.2	97.0382	10	30
vSAG_88_3_B13	Ga0100228_1030931	3	88.1933	98.8434	10	30
vSAG_88_3_B13	Ga0100994_10562	3	84.07	99.321	10	30
vSAG_88_3_B13	Ga0101641_1000562	3	84.07	99.321	10	30
vSAG_88_3_B13	Ga0101728_104136	3	87.91	100.11	10	30
vSAG_88_3_B13	Ga0104988_10986	3	85.96	100.331	10	30
vSAG_88_3_B13	Ga0104999_1006935	3	95.8267	100	10	30
vSAG_88_3_B13	Ga0105010_1003750	3	95.8267	100	10	30
vSAG_88_3_B13	Ga0105012_1003333	3	95.8267	100	10	30
vSAG_88_3_B13	Ga0105015_1003986	3	95.8267	100	10	30
vSAG_88_3_B13	Ga0105016_1017744	3	95.7867	100	10	30
vSAG_88_3_B13	Ga0105016_1020946	3	91.5633	99.33	10	30
vSAG_88_3_B13	Ga0105018_1004621	3	95.8267	100	10	30
vSAG_88_3_B13	Ga0105019_1014490	3	91.5633	99.33	10	30
vSAG_88_3_B13	Ga0105023_1005666	3	95.8267	100	10	30
vSAG_88_3_B13	Ga0114899_1004877	3	86.85	99.8893	10	30
vSAG_88_3_B13	Ga0114901_1000587	3	89.52	99.7821	10	30
vSAG_88_3_B13	Ga0114901_1004031	3	88.59	100.11	10	30
vSAG_88_3_B13	Ga0114902_1000662	3	89.52	99.7821	10	30
vSAG_88_3_B13	Ga0114902_1002687	3	88.7	100.11	10	30
vSAG_88_3_B13	Ga0114902_1003719	3	87.64	99.6768	10	30
vSAG_88_3_B13	Ga0114903_1001745	3	89.52	99.7821	10	30
vSAG_88_3_B13	Ga0114904_1001650	3	89.52	99.7821	10	30
vSAG_88_3_B13	Ga0114905_1001341	3	89.52	99.7821	10	30
vSAG_88_3_B13	Ga0114908_1001087	3	89.52	99.7821	10	30
vSAG_88_3_B13	Ga0114909_1004003	3	89.52	99.7821	10	30
vSAG_88_3_B13	Ga0114910_1000337	3	89.52	99.7821	10	30
vSAG_88_3_B13	Ga0114911_1001860	3	89.52	99.7821	10	30
vSAG_88_3_B13	Ga0114912_1002190	3	86.8933	99.8893	10	30
vSAG_88_3_B13	Ga0114997_10008175	3	86.37	100.11	10	30
vSAG_88_3_B13	Ga0115555_1010733	3	88.1533	100.332	10	30
vSAG_88_3_B13	Ga0115650_1028865	3	91.5633	99.33	10	30
vSAG_88_3_B13	Ga0115651_1021932	3	88.3767	100.11	10	30
vSAG_88_3_B13	Ga0115657_1012744	3	91.5633	99.33	10	30
vSAG_88_3_B13	Ga0115662_1017744	3	95.7867	100	10	30
vSAG_88_3_B13	Ga0115662_1020947	3	91.5633	99.33	10	30
vSAG_88_3_B13	Ga0117925_1003983	3	95.8267	100	10	30
vSAG_88_3_B13	Ga0118712_1012744	3	91.5633	99.33	10	30
vSAG_88_3_B13	Ga0118717_1021932	3	88.3767	100.11	10	30
vSAG_88_3_B13	Ga0118718_1028865	3	91.5633	99.33	10	30
vSAG_88_3_B13	Ga0118723_1007683	3	95.8267	100	10	30
vSAG_88_3_B13	Ga0129351_1004175	3	91.68	99.2088	10	30
vSAG_88_3_B13	Ga0181397_1001187	3	88.74	100.11	10	30
vSAG_88_3_B13	Ga0181401_1000314	3	89.3267	97.3419	10	30
vSAG_88_3_B13	Ga0181406_1000898	3	86.64	97.8878	10	30
vSAG_88_3_B13	Ga0181562_10012096	3	90.9867	98.3027	10	30
vSAG_88_3_B13	Ga0183683_1000069	3	88.6367	98.8962	10	30
vSAG_88_3_B13	Ga0183748_1004426	3	88.87	99.001	10	30
vSAG_88_3_B13	Ga0183748_1006167	3	89.52	97.3162	10	30
vSAG_88_3_B13	Ga0183755_1006734	3	85.87	100.11	10	30
vSAG_88_3_B13	Ga0183757_1003228	3	88.56	99.2329	10	30
vSAG_88_3_B13	Ga0183757_1003910	3	84.31	98.0103	10	30
vSAG_88_3_B13	Ga0187833_10011368	3	85.9067	99.5724	10	30
vSAG_88_3_B13	Ga0196891_1001416	3	90.9467	98.3082	10	30
vSAG_88_3_B13	Ga0196903_1000307	3	93.7767	97.671	10	30
vSAG_88_3_B13	Ga0207895_1002229	3	99.4967	100	10	30
vSAG_88_3_B13	Ga0207900_100552	3	87.7633	99.0683	10	30
vSAG_88_3_B13	Ga0207901_1001256	3	87.96	99.8316	10	30
vSAG_88_3_B13	Ga0207986_1002698	3	90.6033	99.4624	10	30
vSAG_88_3_B13	Ga0207988_1001933	3	90.0433	100	10	30
vSAG_88_3_B13	Ga0208010_1001155	3	83.68	99.5768	10	30
vSAG_88_3_B13	Ga0208010_1001262	3	85.28	100	10	30
vSAG_88_3_B13	Ga0208011_1002614	3	87.8433	97.9798	10	30
vSAG_88_3_B13	Ga0208011_1003259	3	96.91	100.219	10	30
vSAG_88_3_B13	Ga0208029_1000434	3	89	99.8904	10	30
vSAG_88_3_B13	Ga0208029_1001570	3	90.2233	100	10	30
vSAG_88_3_B13	Ga0208029_1001992	3	85.1233	100.332	10	30
vSAG_88_3_B13	Ga0208029_1002064	3	87.4933	99.683	10	30
vSAG_88_3_B13	Ga0208029_1003343	3	89.2467	99.4624	10	30
vSAG_88_3_B13	Ga0208030_1000639	3	89	99.8904	10	30
vSAG_88_3_B13	Ga0208030_1001376	3	86.04	99.683	10	30
vSAG_88_3_B13	Ga0208030_1001879	3	88.5833	100.11	10	30
vSAG_88_3_B13	Ga0208030_1001980	3	86.5367	98.5849	10	30
vSAG_88_3_B13	Ga0208030_1001981	3	86.77	99.2374	10	30
vSAG_88_3_B13	Ga0208030_1002718	3	87.63	99.8921	10	30
vSAG_88_3_B13	Ga0208030_1002887	3	88.58	100.11	10	30
vSAG_88_3_B13	Ga0208030_1003220	3	90.2233	100	10	30
vSAG_88_3_B13	Ga0208030_1004134	3	92.64	99.4949	10	30
vSAG_88_3_B13	Ga0208030_1004461	3	86.5133	100.114	10	30
vSAG_88_3_B13	Ga0208030_1004573	3	95.54	100	10	30
vSAG_88_3_B13	Ga0208129_1002879	3	90.6033	99.4624	10	30
vSAG_88_3_B13	Ga0208134_1000338	3	93.7667	100	10	30
vSAG_88_3_B13	Ga0208156_1001081	3	84.9367	100	10	30
vSAG_88_3_B13	Ga0208156_1001092	3	83.68	99.5768	10	30
vSAG_88_3_B13	Ga0208158_1001276	3	91.9633	99.2754	10	30
vSAG_88_3_B13	Ga0208161_1005200	3	86.1833	98.8073	10	30
vSAG_88_3_B13	Ga0208161_1006173	3	86.1833	98.8073	10	30
vSAG_88_3_B13	Ga0208162_1000040	3	90.9233	100.22	10	30
vSAG_88_3_B13	Ga0208179_1001143	3	88.7133	99.6714	10	30
vSAG_88_3_B13	Ga0208179_1001434	3	88.07	99.683	10	30
vSAG_88_3_B13	Ga0208179_1001623	3	90.44	100	10	30
vSAG_88_3_B13	Ga0208179_1001628	3	89	99.8904	10	30
vSAG_88_3_B13	Ga0208179_1002557	3	87.63	99.8921	10	30
vSAG_88_3_B13	Ga0208179_1002974	3	83.9233	100	10	30
vSAG_88_3_B13	Ga0208179_1003710	3	90.0567	100	10	30
vSAG_88_3_B13	Ga0208179_1004997	3	90.2233	100	10	30
vSAG_88_3_B13	Ga0208179_1005210	3	86.1233	99.5724	10	30
vSAG_88_3_B13	Ga0208180_1000615	3	89	99.8904	10	30
vSAG_88_3_B13	Ga0208180_1001486	3	86.83	99.4624	10	30
vSAG_88_3_B13	Ga0208180_1001984	3	87.63	99.8921	10	30
vSAG_88_3_B13	Ga0208180_1003849	3	90.2233	100	10	30
vSAG_88_3_B13	Ga0208180_1004055	3	92.46	99.4624	10	30
vSAG_88_3_B13	Ga0208181_1000513	3	89.53	99.8904	10	30
vSAG_88_3_B13	Ga0208181_1000667	3	91.4067	100	10	30
vSAG_88_3_B13	Ga0208181_1001086	3	88.5833	100.11	10	30
vSAG_88_3_B13	Ga0208181_1001407	3	90.2233	100	10	30
vSAG_88_3_B13	Ga0208181_1001972	3	86.5133	100.114	10	30
vSAG_88_3_B13	Ga0208181_1002520	3	92.46	99.4624	10	30
vSAG_88_3_B13	Ga0208182_1002424	3	92.46	99.4624	10	30
vSAG_88_3_B13	Ga0208182_1002780	3	89.53	99.8904	10	30
vSAG_88_3_B13	Ga0208182_1002837	3	85.1233	100.332	10	30
vSAG_88_3_B13	Ga0208182_1003177	3	88.5833	100.11	10	30
vSAG_88_3_B13	Ga0208182_1003902	3	89.6167	100	10	30
vSAG_88_3_B13	Ga0208183_1000990	3	88.5833	100.11	10	30
vSAG_88_3_B13	Ga0208183_1001432	3	90.2233	100	10	30
vSAG_88_3_B13	Ga0208183_1002533	3	92.46	99.4624	10	30
vSAG_88_3_B13	Ga0208183_1002942	3	92.6167	99.4949	10	30
vSAG_88_3_B13	Ga0208299_1000168	3	90.19	99.0135	10	30
vSAG_88_3_B13	Ga0208299_1000240	3	90.19	99.0135	10	30
vSAG_88_3_B13	Ga0208299_1008777	3	86.6067	100.221	10	30
vSAG_88_3_B13	Ga0208315_1000261	3	84.62	100.332	10	30
vSAG_88_3_B13	Ga0208315_1000778	3	88.8433	100.221	10	30
vSAG_88_3_B13	Ga0208315_1000928	3	89	99.8904	10	30
vSAG_88_3_B13	Ga0208315_1002574	3	86.7967	99.8921	10	30
vSAG_88_3_B13	Ga0208315_1002936	3	92.46	99.4624	10	30
vSAG_88_3_B13	Ga0208315_1003313	3	88.5833	100.11	10	30
vSAG_88_3_B13	Ga0208315_1003742	3	86.5133	100.114	10	30
vSAG_88_3_B13	Ga0208315_1004765	3	92.6167	99.4949	10	30
vSAG_88_3_B13	Ga0208315_1004817	3	90.2233	100	10	30
vSAG_88_3_B13	Ga0208315_1004878	3	85.1233	100.332	10	30
vSAG_88_3_B13	Ga0208316_1000414	3	89	99.8904	10	30
vSAG_88_3_B13	Ga0208316_1001423	3	87.48	98.7767	10	30
vSAG_88_3_B13	Ga0208316_1002128	3	88.5833	100.11	10	30
vSAG_88_3_B13	Ga0208316_1002332	3	89.45	100	10	30
vSAG_88_3_B13	Ga0208316_1002461	3	86.4533	99.5724	10	30
vSAG_88_3_B13	Ga0208316_1003323	3	87.93	99.683	10	30
vSAG_88_3_B13	Ga0208316_1004217	3	90.2233	100	10	30
vSAG_88_3_B13	Ga0208316_1004811	3	88.7133	99.6714	10	30
vSAG_88_3_B13	Ga0208409_1003135	3	90.6033	99.4624	10	30
vSAG_88_3_B13	Ga0208428_1004328	3	93.6167	100.165	10	30
vSAG_88_3_B13	Ga0208433_1002513	3	96.5733	100.219	10	30
vSAG_88_3_B13	Ga0208433_1003367	3	85.28	100	10	30
vSAG_88_3_B13	Ga0208434_1001912	3	91.2933	100.328	10	30
vSAG_88_3_B13	Ga0208449_1000176	3	89.53	99.8904	10	30
vSAG_88_3_B13	Ga0208449_1001488	3	88.5833	100.11	10	30
vSAG_88_3_B13	Ga0208449_1001769	3	85.1233	100.332	10	30
vSAG_88_3_B13	Ga0208449_1001852	3	92.66	99.4949	10	30
vSAG_88_3_B13	Ga0208449_1002103	3	90.2233	100	10	30
vSAG_88_3_B13	Ga0208449_1003436	3	86.83	99.4624	10	30
vSAG_88_3_B13	Ga0208449_1004539	3	90.9733	99.7143	10	30
vSAG_88_3_B13	Ga0208450_1000324	3	89	99.8904	10	30
vSAG_88_3_B13	Ga0208450_1001596	3	85.1233	100.332	10	30
vSAG_88_3_B13	Ga0208450_1002251	3	92.46	99.4624	10	30
vSAG_88_3_B13	Ga0208450_1004223	3	86.83	99.4624	10	30
vSAG_88_3_B13	Ga0208450_1004597	3	90.2233	100	10	30
vSAG_88_3_B13	Ga0208467_1000552	3	90.6033	99.4624	10	30
vSAG_88_3_B13	Ga0208521_1004818	3	90.1033	99.5614	10	30
vSAG_88_3_B13	Ga0208545_1000122	3	88.8567	98.3121	10	30
vSAG_88_3_B13	Ga0208643_1002768	3	93.7667	100	10	30
vSAG_88_3_B13	Ga0208645_1003332	3	90.2967	96.6189	10	30
vSAG_88_3_B13	Ga0208666_1000923	3	85.45	98.8318	10	30
vSAG_88_3_B13	Ga0208668_1001245	3	85.28	100	10	30
vSAG_88_3_B13	Ga0208669_1001461	3	86.25	98.5947	10	30
vSAG_88_3_B13	Ga0208684_1000532	3	89	99.8904	10	30
vSAG_88_3_B13	Ga0208684_1001970	3	88.5833	100.11	10	30
vSAG_88_3_B13	Ga0208684_1003185	3	90.2233	100	10	30
vSAG_88_3_B13	Ga0208684_1005292	3	91.2567	99.7143	10	30
vSAG_88_3_B13	Ga0208767_1005475	3	91.0733	100.221	10	30
vSAG_88_3_B13	Ga0208790_1004486	3	85.7367	100	10	30
vSAG_88_3_B13	Ga0208792_1001058	3	85.4267	97.68	10	30
vSAG_88_3_B13	Ga0208813_1002658	3	92.64	99.4949	10	30
vSAG_88_3_B13	Ga0208813_1002722	3	92.46	99.4624	10	30
vSAG_88_3_B13	Ga0208813_1002812	3	89	99.8904	10	30
vSAG_88_3_B13	Ga0208813_1003292	3	90.2233	100	10	30
vSAG_88_3_B13	Ga0208813_1003544	3	86.5133	100.114	10	30
vSAG_88_3_B13	Ga0208814_1002564	3	85.8133	97.8319	10	30
vSAG_88_3_B13	Ga0208896_1003952	3	91.9767	99.1667	10	30
vSAG_88_3_B13	Ga0208899_1008768	3	88.31	98.3121	10	30
vSAG_88_3_B13	Ga0208899_1008975	3	90.21	97.0797	10	30
vSAG_88_3_B13	Ga0208919_1001872	3	87.68	98.3323	10	30
vSAG_88_3_B13	Ga0208919_1003229	3	86.69	99.4521	10	30
vSAG_88_3_B13	Ga0208919_1004935	3	86.1167	98.5849	10	30
vSAG_88_3_B13	Ga0208919_1006578	3	91.09	99.4949	10	30
vSAG_88_3_B13	Ga0208934_1000928	3	88.5833	100.11	10	30
vSAG_88_3_B13	Ga0208934_1001262	3	90.2233	100	10	30
vSAG_88_3_B13	Ga0208934_1002055	3	92.46	99.4624	10	30
vSAG_88_3_B13	Ga0208934_1002444	3	89	99.8904	10	30
vSAG_88_3_B13	Ga0208934_1002784	3	85.3367	100.11	10	30
vSAG_88_3_B13	Ga0209128_1002210	3	89.5233	98.9606	10	30
vSAG_88_3_B13	Ga0209128_1005698	3	89.51	99.9306	10	30
vSAG_88_3_B13	Ga0209128_1006204	3	90.3	99.386	10	30
vSAG_88_3_B13	Ga0209128_1006566	3	93.9867	100	10	30
vSAG_88_3_B13	Ga0209193_1003064	3	84.1733	99.1748	10	30
vSAG_88_3_B13	Ga0209194_1005730	3	87.8233	98.5305	10	30
vSAG_88_3_B13	Ga0209337_1000501	3	91.58	100	10	30
vSAG_88_3_B13	Ga0209337_1002040	3	94.3733	100	10	30
vSAG_88_3_B13	Ga0209337_1010218	3	89.6267	100.328	10	30
vSAG_88_3_B13	Ga0209348_1000843	3	89.38	100.627	10	30
vSAG_88_3_B13	Ga0209348_1000855	3	87.0133	99.545	10	30
vSAG_88_3_B13	Ga0209349_1003187	3	93.3667	100	10	30
vSAG_88_3_B13	Ga0209349_1005782	3	90.29	98.9798	10	30
vSAG_88_3_B13	Ga0209434_1001704	3	84.7967	100	10	30
vSAG_88_3_B13	Ga0209434_1002856	3	85.9067	99.5724	10	30
vSAG_88_3_B13	Ga0209499_1002611	3	84.2567	96.1388	10	30
vSAG_88_3_B13	Ga0209535_1000942	3	88.1833	98.2011	10	30
vSAG_88_3_B13	Ga0209634_1000539	3	92.3067	100	10	30
vSAG_88_3_B13	Ga0209653_1002647	3	88.4333	99.4521	10	30
vSAG_88_3_B13	Ga0209667_1007504	3	92.4133	100	10	30
vSAG_88_3_B13	Ga0209709_10000316	3	86.19	100.11	10	30
vSAG_88_3_B13	Ga0209756_1001849	3	88.17	101.09	10	30
vSAG_88_3_B13	Ga0209756_1004775	3	88.6833	100.11	10	30
vSAG_88_3_B13	Ga0209756_1014046	3	91.8367	100	10	30
vSAG_88_3_B13	Ga0209815_1006163	3	92.4567	100	10	30
vSAG_88_3_B13	Ga0209816_1000097	3	87.35	100.226	10	30
vSAG_88_3_B13	Ga0209992_10006025	3	95.21	100	10	30
vSAG_88_3_B13	Ga0209992_10009561	3	87.43	100.329	10	30
vSAG_88_3_B13	Ga0211530_1002678	3	88.2667	101.054	10	30
vSAG_88_3_B13	Ga0211538_1002266	3	88.1567	100.11	10	30
vSAG_88_3_B13	Ga0211560_1001677	3	90.6033	99.4624	10	30
vSAG_88_3_B13	Ga0211566_1002166	3	90.6033	99.4624	10	30
vSAG_88_3_B13	Ga0211573_1003806	3	90.6033	99.4624	10	30
vSAG_88_3_B13	Ga0224703_1133494	3	84.0533	99.8194	10	30
vSAG_88_3_B13	Ga0224906_1000464	3	87.0133	99.545	10	30
vSAG_88_3_B13	Ga0224906_1000577	3	87.7667	98.1681	10	30
vSAG_88_3_B13	Ga0226832_10003319	3	87.6467	100.219	10	30
vSAG_88_3_B13	Ga0228675_1002779	3	87.2967	97.7609	10	30
vSAG_88_3_B13	Ga0233427_10008016	3	92.86	100	10	30
vSAG_88_3_B13	Ga0238865_10236	3	84.1133	100.14	10	30
vSAG_88_3_B13	Ga0255047_10003904	3	89.2367	100.11	10	30
vSAG_88_3_B13	Ga0255047_10007644	3	85.6767	100.11	10	30
vSAG_88_3_B13	Ga0255049_10003096	3	87.1333	100.11	10	30
vSAG_88_3_B13	Ga0255768_10020079	3	89.1167	99.5761	10	30
vSAG_88_3_B13	Ga0255768_10022191	3	88.0067	98.6289	10	30
vSAG_88_3_B13	Ga0255773_10008922	3	91.1867	100.011	10	30
vSAG_88_3_B13	Ga0255775_1003498	3	87.2733	98.7124	10	30
vSAG_88_3_B13	Ga0256380_1000282	3	88.7133	99.6714	10	30
vSAG_88_3_B13	Ga0256381_1000090	3	90.44	100	10	30
vSAG_88_3_B13	Ga0256381_1000217	3	88.7133	99.6714	10	30
vSAG_88_3_B13	Ga0257115_1000904	3	92.86	100	10	30
vSAG_88_3_B13	Ga0307488_10018607	3	90.72	100.552	10	30
vSAG_88_3_B13	Ga0310121_10005275	3	84.26	99.8889	10	30
vSAG_88_3_B13	Ga0315315_10026570	3	86.1	99.1815	10	30
vSAG_88_3_B13	Ga0315316_10000176	3	88.5233	97.8655	10	30
vSAG_88_3_B13	Ga0315331_10000114	3	88.5233	96.6116	10	30
vSAG_88_3_B13	JGI20155J14468_10010282	3	86.9267	98.1131	10	30
vSAG_88_3_B13	JGI20159J14440_10008695	3	87.1467	98.1131	10	30
vSAG_88_3_B13	JGI24004J15324_10004154	3	87	98.0874	10	30
vSAG_88_3_B13	JGI24006J15134_10002847	3	94.4067	100	10	30
vSAG_88_3_B13	JGI24662J20072_1001068	3	98.8967	100	10	30
vSAG_88_3_B13	JGI25128J35275_1000172	3	87.9067	97.7633	10	30
vSAG_88_3_B13	JGI25129J35166_1002421	3	93.41	99.7849	10	30
vSAG_88_3_B13	JGI25907J50239_1000856	3	85.35	98.2533	10	30
vSAG_88_3_B13	KVRMV2_100000634	3	83.0633	99.4465	10	30
vSAG_88_3_B13	KVRMV2_100098386	3	86.19	99.4233	10	30
vSAG_88_3_B13	KVWGV2_10025353	3	86.19	99.4233	10	30
vSAG_88_3_B13	PicMicro_10013655	3	87.2667	100.11	10	30
vSAG_88_3_B22	Ga0098048_1000874	5	90.602	100.121	17	29.4118
vSAG_88_3_B22	Ga0114905_1004194	5	92.044	99.7573	17	29.4118
vSAG_88_3_B22	Ga0114909_1004738	5	92.242	99.7573	17	29.4118
vSAG_88_3_B22	Ga0208030_1004219	5	98.758	99.2727	17	29.4118
vSAG_88_3_B22	Ga0208450_1003181	5	91.926	100.068	17	29.4118
vSAG_88_3_L14	Ga0066848_10001877	5	88.436	100.103	17	29.4118
vSAG_88_3_L14	Ga0068471_1079352	5	86.852	100.094	17	29.4118
vSAG_88_3_L14	Ga0068471_1105996	5	90.932	99.8987	17	29.4118
vSAG_88_3_L14	Ga0068471_1119025	5	91.376	100.944	17	29.4118
vSAG_88_3_L14	Ga0068471_1225889	5	88.528	100.254	17	29.4118
vSAG_88_3_L14	Ga0068478_1151853	5	90.308	99.2471	17	29.4118
vSAG_88_3_L14	Ga0068501_1095637	5	89.024	97.3997	17	29.4118
vSAG_88_3_L14	Ga0068503_10177493	5	87.746	99.8469	17	29.4118
vSAG_88_3_L14	Ga0068503_10212187	5	91.388	101.327	17	29.4118
vSAG_88_3_L14	Ga0068503_10221648	5	90.696	98.8749	17	29.4118
vSAG_88_3_L14	Ga0068503_10291529	5	87.512	99.8497	17	29.4118
vSAG_88_3_L14	Ga0068503_10307299	5	92.552	98.6777	17	29.4118
vSAG_88_3_L14	Ga0068503_10442495	5	88.604	100.488	17	29.4118
vSAG_88_3_L14	Ga0098034_1002906	5	88.218	100.14	17	29.4118
vSAG_88_3_L14	Ga0098035_1002813	5	88.282	100.043	17	29.4118
vSAG_88_3_L14	Ga0098036_1000939	5	89.992	100.057	17	29.4118
vSAG_88_3_L14	Ga0098047_10005293	5	88.704	100.118	17	29.4118
vSAG_88_3_L14	Ga0114905_1005652	5	88.138	98.2101	17	29.4118
vSAG_88_3_L14	Ga0114932_10007572	5	86.038	97.7184	17	29.4118
vSAG_88_3_L14	Ga0114933_10000446	5	86.202	97.7184	17	29.4118
vSAG_88_3_L14	Ga0115651_1009354	5	90.264	99.7177	17	29.4118
vSAG_88_3_L14	Ga0115657_1009912	5	90.184	99.7177	17	29.4118
vSAG_88_3_L14	Ga0117901_1018398	5	92.42	99.7393	17	29.4118
vSAG_88_3_L14	Ga0118712_1009912	5	90.184	99.7177	17	29.4118
vSAG_88_3_L14	Ga0118715_1018398	5	92.42	99.7393	17	29.4118
vSAG_88_3_L14	Ga0118716_1007919	5	90.264	99.7177	17	29.4118
vSAG_88_3_L14	Ga0118717_1009354	5	90.264	99.7177	17	29.4118
vSAG_88_3_L14	Ga0181425_1000585	5	86.138	99.8652	17	29.4118
vSAG_88_3_L14	Ga0183748_1002673	5	90.132	100.311	17	29.4118
vSAG_88_3_L14	Ga0187833_10018411	5	88.596	100.213	17	29.4118
vSAG_88_3_L14	Ga0207890_1000706	5	84.728	100.762	17	29.4118
vSAG_88_3_L14	Ga0208010_1001155	5	88.34	100.066	17	29.4118
vSAG_88_3_L14	Ga0208156_1001092	5	88.22	100.066	17	29.4118
vSAG_88_3_L14	Ga0208157_1000087	5	89.6	97.164	17	29.4118
vSAG_88_3_L14	Ga0208157_1000159	5	89.6	97.164	17	29.4118
vSAG_88_3_L14	Ga0208157_1000517	5	89.946	100.254	17	29.4118
vSAG_88_3_L14	Ga0208179_1004694	5	92.488	100.148	17	29.4118
vSAG_88_3_L14	Ga0208315_1002283	5	89.976	99.6903	17	29.4118
vSAG_88_3_L14	Ga0208425_1000012	5	86.134	98.7903	17	29.4118
vSAG_88_3_L14	Ga0208433_1002614	5	88.646	100.145	17	29.4118
vSAG_88_3_L14	Ga0208449_1001431	5	92.01	100.125	17	29.4118
vSAG_88_3_L14	Ga0208449_1001769	5	91.124	100.012	17	29.4118
vSAG_88_3_L14	Ga0208666_1000425	5	89.946	100.254	17	29.4118
vSAG_88_3_L14	Ga0208668_1001205	5	88.514	100.146	17	29.4118
vSAG_88_3_L14	Ga0208814_1002816	5	88.6	99.5658	17	29.4118
vSAG_88_3_L14	Ga0208919_1000360	5	89.946	100.254	17	29.4118
vSAG_88_3_L14	Ga0209279_10002298	5	87.194	99.1984	17	29.4118
vSAG_88_3_L14	Ga0209279_10002366	5	89.046	99.7476	17	29.4118
vSAG_88_3_L14	Ga0209337_1001189	5	83.414	97.8403	17	29.4118
vSAG_88_3_L14	Ga0209349_1004111	5	87.916	100.066	17	29.4118
vSAG_88_3_L14	Ga0209360_1001430	5	88.056	100.517	17	29.4118
vSAG_88_3_L14	Ga0209535_1005019	5	86.95	100.006	17	29.4118
vSAG_88_3_L14	Ga0209709_10015302	5	96.076	100.013	17	29.4118
vSAG_88_3_L14	Ga0209709_10015805	5	86.538	99.1538	17	29.4118
vSAG_88_3_L14	Ga0209756_1000528	5	84.864	98.6799	17	29.4118
vSAG_88_3_L14	Ga0209830_10012706	5	87.372	98.9444	17	29.4118
vSAG_88_3_L14	Ga0209992_10004760	5	90.622	100.544	17	29.4118
vSAG_88_3_L14	Ga0209992_10005399	5	84.982	99.7821	17	29.4118
vSAG_88_3_L14	Ga0211699_10000283	5	86.398	98.7825	17	29.4118
vSAG_88_3_L14	SI34jun09_120mDRAFT_1001489	5	88.06	100.364	17	29.4118
vSAG_88_3_L14	SI39nov09_120mDRAFT_c1001268	5	88.06	100.364	17	29.4118
vSAG_88_3_L14	Station30_DCM_ALL_assembly_NODE_155_length_51034_cov_133,668746	5	85.614	98.0173	17	29.4118
vSAG_88_3_G20	Ga0068471_1079353	7	88.7629	100.302	24	29.1667
vSAG_88_3_G20	Ga0068471_1091973	7	92.6414	100.026	24	29.1667
vSAG_88_3_G20	Ga0068471_1113703	7	88.95	99.8145	24	29.1667
vSAG_88_3_G20	Ga0068471_1119025	7	93.7629	99.6629	24	29.1667
vSAG_88_3_G20	Ga0068471_1225889	7	87.8986	100.619	24	29.1667
vSAG_88_3_G20	Ga0068478_1151853	7	93.1257	97.89	24	29.1667
vSAG_88_3_G20	Ga0068503_10185264	7	88.5143	100.219	24	29.1667
vSAG_88_3_G20	Ga0068503_10196321	7	96.1429	99.9325	24	29.1667
vSAG_88_3_G20	Ga0068503_10215147	7	88.3386	99.0237	24	29.1667
vSAG_88_3_G20	Ga0183683_1000069	7	89.2786	98.8648	24	29.1667
vSAG_88_3_G20	Ga0183748_1000392	7	88.8386	99.9858	24	29.1667
vSAG_88_3_G20	Ga0183755_1001579	7	91.1886	99.4459	24	29.1667
vSAG_88_3_G20	Ga0207890_1000706	7	86.2271	100.369	24	29.1667
vSAG_88_3_G20	Ga0208158_1000095	7	92.2543	99.9321	24	29.1667
vSAG_88_3_G20	Ga0208181_1001972	7	90.7471	99.9835	24	29.1667
vSAG_88_3_G20	Ga0208182_1002837	7	90.94	99.9302	24	29.1667
vSAG_88_3_G20	Ga0208274_1002116	7	92.1671	99.4918	24	29.1667
vSAG_88_3_G20	Ga0208450_1001596	7	90.27	100.319	24	29.1667
vSAG_88_3_G20	Ga0208666_1000127	7	89.1357	99.831	24	29.1667
vSAG_88_3_G20	Ga0208669_1000573	7	89.1357	99.831	24	29.1667
vSAG_88_3_G20	Ga0208919_1000448	7	88.2071	100.014	24	29.1667
vSAG_88_3_G20	Ga0208920_1000521	7	88.2129	98.8148	24	29.1667
vSAG_88_3_G20	Ga0209657_1000180	7	91.5086	100.101	24	29.1667
vSAG_88_3_G20	Ga0209992_10001352	7	86.66	99.9264	24	29.1667
vSAG_88_3_G20	Ga0211699_10000283	7	85.7243	99.1394	24	29.1667
vSAG_27_D11	Ga0114997_10002553	9	88.7567	98.1409	32	28.125
vSAG_86_3_F4	Ga0114898_1006408	5	82.518	100.587	18	27.7778
vSAG_86_3_F4	Ga0114905_1002753	5	89.08	99.8036	18	27.7778
vSAG_86_3_F4	Ga0114905_1004699	5	94.36	100	18	27.7778
vSAG_86_3_F4	Ga0114905_1004721	5	94.134	100	18	27.7778
vSAG_86_3_F4	Ga0114906_1004417	5	87.624	99.6364	18	27.7778
vSAG_86_3_F4	Ga0114908_1004522	5	94.36	100	18	27.7778
vSAG_86_3_F4	Ga0114908_1005382	5	94.134	100	18	27.7778
vSAG_86_3_F4	Ga0114909_1002666	5	89.012	99.8396	18	27.7778
vSAG_86_3_F4	Ga0114910_1003363	5	94.134	100	18	27.7778
vSAG_86_3_F4	Ga0115651_1013887	5	93.662	99.073	18	27.7778
vSAG_86_3_F4	Ga0115652_1008702	5	93.662	99.073	18	27.7778
vSAG_86_3_F4	Ga0115661_1008702	5	93.662	99.073	18	27.7778
vSAG_86_3_F4	Ga0118716_1018908	5	93.662	99.073	18	27.7778
vSAG_86_3_F4	Ga0118717_1013887	5	93.662	99.073	18	27.7778
vSAG_86_3_F4	Ga0183755_1001377	5	83.576	100.271	18	27.7778
vSAG_86_3_F4	Ga0208012_1001754	5	91.89	98.5762	18	27.7778
vSAG_86_3_F4	Ga0208030_1004024	5	93.898	100	18	27.7778
vSAG_86_3_F4	Ga0208179_1003635	5	94.318	100	18	27.7778
vSAG_86_3_F4	Ga0208180_1003858	5	93.898	100	18	27.7778
vSAG_86_3_F4	Ga0208181_1002446	5	94.318	100	18	27.7778
vSAG_86_3_F4	Ga0208183_1002644	5	96.144	99.8165	18	27.7778
vSAG_86_3_F4	Ga0208315_1002437	5	94.318	100	18	27.7778
vSAG_86_3_F4	Ga0208315_1003525	5	95.912	97.3923	18	27.7778
vSAG_86_3_F4	Ga0208449_1003429	5	94.318	100	18	27.7778
vSAG_86_3_F4	Ga0208449_1004666	5	94.096	100	18	27.7778
vSAG_86_3_F4	Ga0208450_1002590	5	95.48	99.8165	18	27.7778
vSAG_86_3_F4	Ga0208450_1002827	5	94.096	100	18	27.7778
vSAG_86_3_F4	Ga0208450_1003481	5	94.318	100	18	27.7778
vSAG_86_3_F4	Ga0208684_1002598	5	93.898	100	18	27.7778
vSAG_86_3_F4	Ga0208684_1003305	5	88.884	99.8165	18	27.7778
vSAG_86_3_F4	Ga0208684_1004292	5	94.096	100	18	27.7778
vSAG_86_3_F4	Ga0208684_1005396	5	93.306	99.3998	18	27.7778
vSAG_86_3_F4	Ga0208790_1004788	5	90.07	100	18	27.7778
vSAG_86_3_F4	Ga0208934_1002593	5	95.684	99.8165	18	27.7778
vSAG_27_A8	Ga0208012_1000291	8	90.8812	99.9023	29	27.5862
vSAG_27_A8	Ga0209128_1003222	8	88.4537	99.5471	29	27.5862
vSAG_27_A8	Ga0209434_1001196	8	88.92	99.6029	29	27.5862
vSAG_27_A8	JGI25133J35611_10003063	8	99.9275	100	29	27.5862
vSAG_27_A8	JGI25134J35505_10001665	8	100	100	29	27.5862
vSAG_88_3_D14	Ga0208553_1002734	8	92.1238	98.5465	29	27.5862
vSAG_88_3_D14	Ga0208919_1003709	8	92.0888	98.5465	29	27.5862
vSAG_88_3_D14	Ga0209349_1003339	8	89.0438	97.9169	29	27.5862
vSAG_88_3_D14	Ga0209349_1004848	8	92.13	98.5465	29	27.5862
vSAG_88_3_D14	Ga0209434_1005207	8	92.13	98.5465	29	27.5862
vSAG_88_3_D14	Ga0209756_1012601	8	89.0125	97.7508	29	27.5862
vSAG_88_3_D14	GBIDBA_10009497	8	90.7362	99.1625	29	27.5862
vSAG_88_3_D14	Station100_DCM_ALL_assembly_NODE_104_length_58457_cov_22,251464	8	86.4338	97.691	29	27.5862
vSAG_88_3_K16	DelMOWin2010_c10002945	6	88.5417	99.2908	22	27.2727
vSAG_88_3_K16	Ga0098074_1000366	6	87.835	99.995	22	27.2727
vSAG_88_3_K16	Ga0181402_1000011	6	88.2917	99.6037	22	27.2727
vSAG_88_3_K16	Ga0181407_1000222	6	87.785	100.025	22	27.2727
vSAG_88_3_K16	Ga0196901_1000128	6	88.2283	100.123	22	27.2727
vSAG_88_3_K16	Ga0208161_1000162	6	88.2283	100.123	22	27.2727
vSAG_88_3_K16	Ga0208425_1000065	6	85.6017	97.9279	22	27.2727
vSAG_88_3_K16	Ga0208794_1000162	6	88.22	100.03	22	27.2727
vSAG_88_3_K16	Ga0208795_1000112	6	88.2283	100.123	22	27.2727
vSAG_88_3_K16	Ga0208899_1000150	6	88.91	99.9654	22	27.2727
vSAG_88_3_K16	Ga0208899_1000414	6	88.91	99.9654	22	27.2727
vSAG_88_3_K16	Ga0209194_1000151	6	88.3267	100.025	22	27.2727
vSAG_88_3_K16	Ga0209348_1000097	6	84.4583	99.0686	22	27.2727
vSAG_88_3_K16	Ga0209645_1000083	6	88.4867	100.09	22	27.2727
vSAG_88_3_K16	Ga0222717_10002268	6	89.935	98.3115	22	27.2727
vSAG_88_3_K16	Station100_DCM_ALL_assembly_NODE_113_length_56953_cov_8,525045	6	88.34	100.06	22	27.2727
vSAG_88_3_K16	Station100_SUR_ALL_assembly_NODE_263_length_34745_cov_29,664889_1	6	84.9783	98.9343	22	27.2727
vSAG_88_3_K16	Station138_MES_COMBINED_FINAL_NODE_2211_length_31746_cov_4,620334	6	94.5383	100.056	22	27.2727
vSAG_88_3_K16	Station196_SUR_ALL_assembly_NODE_512_length_54417_cov_5,729039	6	86.1	98.6986	22	27.2727
vSAG_30_F21	Ga0099847_1000004	9	88.3033	97.4979	35	25.7143
vSAG_30_F21	Ga0129324_10000088	9	88.3033	97.4979	35	25.7143
vSAG_30_F21	Ga0180120_10000031	9	88.2667	97.9627	35	25.7143
vSAG_30_F21	Ga0208303_1000019	9	88.2389	97.9627	35	25.7143
vSAG_30_J17	Ga0208899_1000046	19	85.4874	98.3718	75	25.3333
vSAG_30_J17	Station124_MXL_ALL_assembly_NODE_148_length_53140_cov_25,017331	19	84.9895	98.2738	75	25.3333
vSAG_27_D11	Ga0209503_10000299	8	90.515	99.2294	32	25
vSAG_88_3_G20	Ga0068470_1105041	6	91.3283	99.4114	24	25
vSAG_88_3_G20	Ga0068470_1109147	6	92.1333	98.9445	24	25
vSAG_88_3_G20	Ga0068471_1068527	6	91.365	99.5652	24	25
vSAG_88_3_G20	Ga0068471_1079351	6	87.3817	100.51	24	25
vSAG_88_3_G20	Ga0068471_1079352	6	87.46	100.206	24	25
vSAG_88_3_G20	Ga0068471_1105996	6	91.7	99.1323	24	25
vSAG_88_3_G20	Ga0068471_1120620	6	89.345	98.5916	24	25
vSAG_88_3_G20	Ga0068471_1167481	6	91.475	98.615	24	25
vSAG_88_3_G20	Ga0068482_1141101	6	93.9	99.2349	24	25
vSAG_88_3_G20	Ga0068482_1146218	6	89.3217	100.242	24	25
vSAG_88_3_G20	Ga0068503_10177493	6	91.0417	99.6467	24	25
vSAG_88_3_G20	Ga0068503_10180364	6	91.4217	99.5937	24	25
vSAG_88_3_G20	Ga0068503_10189954	6	87.8117	98.7495	24	25
vSAG_88_3_G20	Ga0068503_10196283	6	92.5317	100.336	24	25
vSAG_88_3_G20	Ga0068503_10196320	6	87.1783	99.5714	24	25
vSAG_88_3_G20	Ga0068503_10201780	6	94.1533	99.8804	24	25
vSAG_88_3_G20	Ga0068503_10205413	6	89.8	99.6345	24	25
vSAG_88_3_G20	Ga0068503_10221648	6	90.395	98.8138	24	25
vSAG_88_3_G20	Ga0068503_10251268	6	88.67	99.7863	24	25
vSAG_88_3_G20	Ga0068503_10291529	6	87.495	100.018	24	25
vSAG_88_3_G20	Ga0068503_10442495	6	91.79	98.6612	24	25
vSAG_88_3_G20	Ga0070752_1005562	6	85.2567	100.196	24	25
vSAG_88_3_G20	Ga0075478_10000654	6	86.4233	101.387	24	25
vSAG_88_3_G20	Ga0098036_1000942	6	86.745	99.1564	24	25
vSAG_88_3_G20	Ga0098038_1000696	6	86.745	99.1564	24	25
vSAG_88_3_G20	Ga0105012_1003333	6	86.1167	100.505	24	25
vSAG_88_3_G20	Ga0105015_1003986	6	86.045	100.505	24	25
vSAG_88_3_G20	Ga0105018_1005051	6	87.5	99.2279	24	25
vSAG_88_3_G20	Ga0110931_1000441	6	86.745	99.1564	24	25
vSAG_88_3_G20	Ga0117925_1003983	6	87.035	100.41	24	25
vSAG_88_3_G20	Ga0118723_1007683	6	86.5867	100.413	24	25
vSAG_88_3_G20	Ga0181406_1000898	6	83.8933	98.4002	24	25
vSAG_88_3_G20	Ga0183683_1000405	6	88.6117	100.087	24	25
vSAG_88_3_G20	Ga0183757_1000841	6	87.2217	98.401	24	25
vSAG_88_3_G20	Ga0208010_1001155	6	90.7117	98.6035	24	25
vSAG_88_3_G20	Ga0208029_1003000	6	93.3133	99.0525	24	25
vSAG_88_3_G20	Ga0208030_1004461	6	89.4667	99.9808	24	25
vSAG_88_3_G20	Ga0208156_1001092	6	90.7117	98.6035	24	25
vSAG_88_3_G20	Ga0208157_1000424	6	87.0717	98.7759	24	25
vSAG_88_3_G20	Ga0208162_1000040	6	82.4917	99.7249	24	25
vSAG_88_3_G20	Ga0208179_1001623	6	85.1283	97.242	24	25
vSAG_88_3_G20	Ga0208180_1001851	6	90.3867	100.101	24	25
vSAG_88_3_G20	Ga0208315_1000261	6	88.5933	100.228	24	25
vSAG_88_3_G20	Ga0208449_1001769	6	89.9467	100.279	24	25
vSAG_88_3_G20	Ga0208449_1005318	6	89.7433	99.6818	24	25
vSAG_88_3_G20	Ga0208645_1003964	6	85.355	99.6501	24	25
vSAG_88_3_G20	Ga0208666_1000449	6	87.0717	98.7759	24	25
vSAG_88_3_G20	Ga0208666_1001251	6	92.325	99.8688	24	25
vSAG_88_3_G20	Ga0208813_1003544	6	91.215	100.109	24	25
vSAG_88_3_G20	Ga0208814_1002801	6	88.2967	99.9138	24	25
vSAG_88_3_G20	Ga0208919_1000080	6	88.165	99.0169	24	25
vSAG_88_3_G20	Ga0208919_1000302	6	87.0717	98.7759	24	25
vSAG_88_3_G20	Ga0208919_1000360	6	89.0367	99.7444	24	25
vSAG_88_3_G20	Ga0208919_1000436	6	87.0717	98.7759	24	25
vSAG_88_3_G20	Ga0209193_1004641	6	88.1017	99.1687	24	25
vSAG_88_3_G20	Ga0209279_10001387	6	87.2467	99.5508	24	25
vSAG_88_3_G20	Ga0209337_1002040	6	86.3767	100.566	24	25
vSAG_88_3_G20	Ga0209535_1001698	6	87.2033	100.252	24	25
vSAG_88_3_G20	Ga0209602_1000028	6	85.12	99.5062	24	25
vSAG_88_3_G20	Ga0209709_10015302	6	91.6983	99.7436	24	25
vSAG_88_3_G20	Ga0209992_10004546	6	92.8333	99.19	24	25
vSAG_88_3_G20	Ga0211538_1002266	6	85.075	99.8735	24	25
vSAG_88_3_G20	Ga0257115_1000904	6	86.355	99.8555	24	25
vSAG_88_3_G20	Station122_SUR_ALL_assembly_NODE_205_length_43103_cov_45,743612	6	85.18	98.9329	24	25
vSAG_27_A8	Abe_10000942	7	87.0686	97.4846	29	24.1379
vSAG_27_A8	Ga0105016_1010960	7	89.7729	99.4613	29	24.1379
vSAG_27_A8	Ga0105018_1001092	7	92.6771	99.4078	29	24.1379
vSAG_27_A8	Ga0114906_1000117	7	88.76	98.8838	29	24.1379
vSAG_27_A8	Ga0115662_1010960	7	89.7729	99.4613	29	24.1379
vSAG_27_A8	Ga0118728_1001404	7	89.0029	98.9068	29	24.1379
vSAG_27_A8	Ga0209128_1001049	7	94.8686	99.6356	29	24.1379
vSAG_27_A8	Ga0209434_1000575	7	90.6814	97.4097	29	24.1379
vSAG_27_A8	PicViral_1000445	7	90.33	97.986	29	24.1379
vSAG_27_A8	Station18_DCM_ALL_assembly_NODE_41_length_76691_cov_69,442416	7	85.8271	97.9179	29	24.1379
vSAG_27_A8	Station193_SUR_ALL_assembly_NODE_85_length_184545_cov_7,093474	7	88.2771	98.5741	29	24.1379
vSAG_88_3_D14	Ga0100228_1029538	7	90.6586	99.4961	29	24.1379
vSAG_88_3_D14	Ga0207890_1000265	7	85.8386	100.904	29	24.1379
vSAG_88_3_D14	Ga0207896_1000202	7	85.8386	100.904	29	24.1379
vSAG_88_3_D14	Ga0208013_1000818	7	87.11	98.5671	29	24.1379
vSAG_88_3_D14	Ga0208315_1001907	7	96.0143	99.243	29	24.1379
vSAG_88_3_D14	Ga0208545_1001183	7	85.9371	100.891	29	24.1379
vSAG_88_3_D14	Ga0208643_1001449	7	85.6286	101.084	29	24.1379
vSAG_88_3_D14	Ga0208645_1003956	7	85.4043	101.084	29	24.1379
vSAG_88_3_D14	Ga0208767_1002481	7	85.6286	101.084	29	24.1379
vSAG_88_3_D14	Ga0211477_10006759	7	86.3257	101.269	29	24.1379
vSAG_30_J17	Ga0255752_10000235	18	86.9622	99.6435	75	24
vSAG_88_3_B22	Ga0068471_1214486	4	91.0625	99.3961	17	23.5294
vSAG_88_3_B22	Ga0070754_10000221	4	89.9525	99.5717	17	23.5294
vSAG_88_3_B22	Ga0098036_1001183	4	91.02	97.665	17	23.5294
vSAG_88_3_B22	Ga0098052_1008576	4	92.105	100.151	17	23.5294
vSAG_88_3_B22	Ga0114899_1005897	4	91.1325	99.5912	17	23.5294
vSAG_88_3_B22	Ga0114900_1005607	4	89.385	99.6795	17	23.5294
vSAG_88_3_B22	Ga0114901_1002527	4	91.135	99.6967	17	23.5294
vSAG_88_3_B22	Ga0114902_1003093	4	89.385	99.6795	17	23.5294
vSAG_88_3_B22	Ga0114905_1005328	4	89.385	99.6795	17	23.5294
vSAG_88_3_B22	Ga0114906_1003573	4	89.385	99.6795	17	23.5294
vSAG_88_3_B22	Ga0114906_1004284	4	88.3225	99.0807	17	23.5294
vSAG_88_3_B22	Ga0114906_1006591	4	91.1825	99.6967	17	23.5294
vSAG_88_3_B22	Ga0114910_1001888	4	91.135	99.6967	17	23.5294
vSAG_88_3_B22	Ga0117902_1035277	4	91.4825	100.329	17	23.5294
vSAG_88_3_B22	Ga0118714_1035277	4	91.4825	100.329	17	23.5294
vSAG_88_3_B22	Ga0118722_1026741	4	89.4925	99.5074	17	23.5294
vSAG_88_3_B22	Ga0208029_1000225	4	91.015	100.315	17	23.5294
vSAG_88_3_B22	Ga0208029_1001913	4	93.78	99.1244	17	23.5294
vSAG_88_3_B22	Ga0208030_1001127	4	87.8875	99.8387	17	23.5294
vSAG_88_3_B22	Ga0208030_1002605	4	91.32	100.086	17	23.5294
vSAG_88_3_B22	Ga0208180_1002519	4	91.0975	100.086	17	23.5294
vSAG_88_3_B22	Ga0208182_1000585	4	91.015	100.315	17	23.5294
vSAG_88_3_B22	Ga0208315_1003528	4	91.2275	100.086	17	23.5294
vSAG_88_3_B22	Ga0208315_1003840	4	90.41	99.8387	17	23.5294
vSAG_88_3_B22	Ga0208449_1000185	4	91.015	100.315	17	23.5294
vSAG_88_3_B22	Ga0208449_1002131	4	91.0975	100.086	17	23.5294
vSAG_88_3_B22	Ga0208449_1003016	4	91.765	99.2399	17	23.5294
vSAG_88_3_B22	Ga0208449_1004455	4	90.4775	99.8387	17	23.5294
vSAG_88_3_B22	Ga0208684_1001849	4	91.0975	100.086	17	23.5294
vSAG_88_3_B22	Ga0208919_1000395	4	90.595	100.315	17	23.5294
vSAG_88_3_B22	Ga0209992_10007958	4	94.4925	99.4975	17	23.5294
vSAG_88_3_B22	Ga0209992_10009485	4	94.4925	99.4975	17	23.5294
vSAG_88_3_L14	DelMOSpr2010_c10002720	4	84.7925	99.7383	17	23.5294
vSAG_88_3_L14	Ga0008649_10007232	4	89.2425	100.483	17	23.5294
vSAG_88_3_L14	Ga0068470_1119744	4	88.8	99.1529	17	23.5294
vSAG_88_3_L14	Ga0068471_1079351	4	87.77	100.296	17	23.5294
vSAG_88_3_L14	Ga0068471_1079353	4	88.1225	100.329	17	23.5294
vSAG_88_3_L14	Ga0068471_1120620	4	89.205	99.8264	17	23.5294
vSAG_88_3_L14	Ga0068471_1200001	4	88.14	97.6554	17	23.5294
vSAG_88_3_L14	Ga0068503_10180364	4	92.1475	100.205	17	23.5294
vSAG_88_3_L14	Ga0068503_10195769	4	90.66	100.957	17	23.5294
vSAG_88_3_L14	Ga0068503_10196283	4	92.1225	100.714	17	23.5294
vSAG_88_3_L14	Ga0070750_10007017	4	82.8375	100.077	17	23.5294
vSAG_88_3_L14	Ga0073579_1168977	4	83.405	96.7972	17	23.5294
vSAG_88_3_L14	Ga0073579_1189383	4	87.6225	99.7055	17	23.5294
vSAG_88_3_L14	Ga0073579_1189588	4	84.73	97.8049	17	23.5294
vSAG_88_3_L14	Ga0073579_1190027	4	84.2575	96.8633	17	23.5294
vSAG_88_3_L14	Ga0075479_10004835	4	83.7825	99.9558	17	23.5294
vSAG_88_3_L14	Ga0098044_1006087	4	93.305	100.372	17	23.5294
vSAG_88_3_L14	Ga0098060_1003095	4	89.7	100.185	17	23.5294
vSAG_88_3_L14	Ga0098061_1000932	4	84.0525	99.3436	17	23.5294
vSAG_88_3_L14	Ga0104999_1008891	4	90.0775	100.212	17	23.5294
vSAG_88_3_L14	Ga0105011_1008695	4	90.1075	100.212	17	23.5294
vSAG_88_3_L14	Ga0105012_1015370	4	88.505	101.326	17	23.5294
vSAG_88_3_L14	Ga0105015_1008355	4	90.0775	100.212	17	23.5294
vSAG_88_3_L14	Ga0105016_1017922	4	90.0775	100.212	17	23.5294
vSAG_88_3_L14	Ga0105018_1009239	4	90.0775	100.212	17	23.5294
vSAG_88_3_L14	Ga0105019_1013717	4	88.5875	98.3062	17	23.5294
vSAG_88_3_L14	Ga0105023_1006505	4	90.0775	100.212	17	23.5294
vSAG_88_3_L14	Ga0110931_1001678	4	89.4475	99.9964	17	23.5294
vSAG_88_3_L14	Ga0114933_10007913	4	89.2425	98.9289	17	23.5294
vSAG_88_3_L14	Ga0114981_10000874	4	86.3675	98.0115	17	23.5294
vSAG_88_3_L14	Ga0115650_1023115	4	90.5925	100.211	17	23.5294
vSAG_88_3_L14	Ga0115651_1019668	4	89.655	99.2515	17	23.5294
vSAG_88_3_L14	Ga0115652_1005023	4	90.0775	100.212	17	23.5294
vSAG_88_3_L14	Ga0115661_1005023	4	90.0775	100.212	17	23.5294
vSAG_88_3_L14	Ga0115662_1017923	4	90.0775	100.212	17	23.5294
vSAG_88_3_L14	Ga0117920_1006290	4	90.0775	100.212	17	23.5294
vSAG_88_3_L14	Ga0117922_1007731	4	90.0775	100.212	17	23.5294
vSAG_88_3_L14	Ga0118716_1018291	4	86.975	99.2015	17	23.5294
vSAG_88_3_L14	Ga0118717_1019668	4	89.655	99.2515	17	23.5294
vSAG_88_3_L14	Ga0118718_1023115	4	90.5925	100.211	17	23.5294
vSAG_88_3_L14	Ga0160423_10001268	4	86.7825	97.0161	17	23.5294
vSAG_88_3_L14	Ga0163179_10001760	4	85.8575	99.0618	17	23.5294
vSAG_88_3_L14	Ga0180438_10006555	4	84.78	98.3689	17	23.5294
vSAG_88_3_L14	Ga0181380_1000588	4	85.755	100.282	17	23.5294
vSAG_88_3_L14	Ga0181380_1002167	4	82.93	99.3295	17	23.5294
vSAG_88_3_L14	Ga0181380_1002410	4	85.58	99.7806	17	23.5294
vSAG_88_3_L14	Ga0181382_1000377	4	85.7025	100.282	17	23.5294
vSAG_88_3_L14	Ga0181383_1000205	4	85.755	100.282	17	23.5294
vSAG_88_3_L14	Ga0181383_1000412	4	85.58	99.7806	17	23.5294
vSAG_88_3_L14	Ga0181385_1000966	4	85.58	99.7806	17	23.5294
vSAG_88_3_L14	Ga0181385_1000993	4	85.755	100.282	17	23.5294
vSAG_88_3_L14	Ga0181386_1000324	4	85.755	100.282	17	23.5294
vSAG_88_3_L14	Ga0181389_1000987	4	85.725	100.282	17	23.5294
vSAG_88_3_L14	Ga0181391_1001299	4	85.3975	100.282	17	23.5294
vSAG_88_3_L14	Ga0181394_1000568	4	85.2175	97.3973	17	23.5294
vSAG_88_3_L14	Ga0181394_1001122	4	85.725	100.282	17	23.5294
vSAG_88_3_L14	Ga0181395_1000858	4	85.0825	99.5848	17	23.5294
vSAG_88_3_L14	Ga0181397_1000191	4	85.0825	99.5848	17	23.5294
vSAG_88_3_L14	Ga0181397_1001737	4	86.01	99.4016	17	23.5294
vSAG_88_3_L14	Ga0181401_1000797	4	85.755	100.282	17	23.5294
vSAG_88_3_L14	Ga0181404_1000810	4	85.58	99.7806	17	23.5294
vSAG_88_3_L14	Ga0181405_1000749	4	85.725	100.282	17	23.5294
vSAG_88_3_L14	Ga0181405_1001320	4	85.58	99.7806	17	23.5294
vSAG_88_3_L14	Ga0181406_1001630	4	85.55	99.7806	17	23.5294
vSAG_88_3_L14	Ga0181414_1000660	4	85.755	100.282	17	23.5294
vSAG_88_3_L14	Ga0181415_1000207	4	87.575	100.333	17	23.5294
vSAG_88_3_L14	Ga0181416_1000307	4	85.725	100.282	17	23.5294
vSAG_88_3_L14	Ga0181417_1000254	4	85.755	100.282	17	23.5294
vSAG_88_3_L14	Ga0181418_1000697	4	85.755	100.282	17	23.5294
vSAG_88_3_L14	Ga0181419_1000488	4	87.48	100.333	17	23.5294
vSAG_88_3_L14	Ga0181420_1001357	4	87.49	100.333	17	23.5294
vSAG_88_3_L14	Ga0181421_1000252	4	85.9025	99.541	17	23.5294
vSAG_88_3_L14	Ga0181423_1000824	4	85.9025	99.541	17	23.5294
vSAG_88_3_L14	Ga0181555_1002885	4	84.685	98.6755	17	23.5294
vSAG_88_3_L14	Ga0181556_1003441	4	84.685	98.6755	17	23.5294
vSAG_88_3_L14	Ga0181557_1003829	4	84.685	98.6755	17	23.5294
vSAG_88_3_L14	Ga0181563_10009603	4	83.3075	99.404	17	23.5294
vSAG_88_3_L14	Ga0183683_1000405	4	90.095	98.8062	17	23.5294
vSAG_88_3_L14	Ga0183683_1001079	4	87.3425	96.7076	17	23.5294
vSAG_88_3_L14	Ga0183748_1001858	4	86.7825	97.5734	17	23.5294
vSAG_88_3_L14	Ga0183755_1002941	4	88.96	99.3329	17	23.5294
vSAG_88_3_L14	Ga0183757_1000886	4	83.1575	98.3939	17	23.5294
vSAG_88_3_L14	Ga0183757_1001191	4	84.5525	99.7723	17	23.5294
vSAG_88_3_L14	Ga0187218_1001219	4	85.4925	100.452	17	23.5294
vSAG_88_3_L14	Ga0187220_1000976	4	87.575	100.333	17	23.5294
vSAG_88_3_L14	Ga0187221_1000772	4	85.6725	100.282	17	23.5294
vSAG_88_3_L14	Ga0207890_1000281	4	85.3575	100.282	17	23.5294
vSAG_88_3_L14	Ga0207901_1000183	4	83.9275	95.8831	17	23.5294
vSAG_88_3_L14	Ga0207906_1000168	4	83.9275	95.8831	17	23.5294
vSAG_88_3_L14	Ga0208012_1000255	4	83.2775	96.2728	17	23.5294
vSAG_88_3_L14	Ga0208030_1002169	4	85.7875	99.6192	17	23.5294
vSAG_88_3_L14	Ga0208030_1004172	4	90.74	100.18	17	23.5294
vSAG_88_3_L14	Ga0208030_1004461	4	87.38	100.152	17	23.5294
vSAG_88_3_L14	Ga0208032_1001341	4	88.08	99.7339	17	23.5294
vSAG_88_3_L14	Ga0208032_1001796	4	90.8025	100.034	17	23.5294
vSAG_88_3_L14	Ga0208134_1002468	4	83.2425	100.172	17	23.5294
vSAG_88_3_L14	Ga0208134_1004462	4	83.4425	97.5979	17	23.5294
vSAG_88_3_L14	Ga0208150_1000035	4	85.4	99.5809	17	23.5294
vSAG_88_3_L14	Ga0208158_1000095	4	95.215	100.389	17	23.5294
vSAG_88_3_L14	Ga0208158_1000717	4	87.31	97.3103	17	23.5294
vSAG_88_3_L14	Ga0208162_1000925	4	85.0675	99.5855	17	23.5294
vSAG_88_3_L14	Ga0208162_1001718	4	82.775	98.827	17	23.5294
vSAG_88_3_L14	Ga0208181_1001972	4	87.4975	100.154	17	23.5294
vSAG_88_3_L14	Ga0208316_1004923	4	87.4225	100.154	17	23.5294
vSAG_88_3_L14	Ga0208427_1000174	4	84.54	99.6221	17	23.5294
vSAG_88_3_L14	Ga0208428_1000044	4	85.4	99.5809	17	23.5294
vSAG_88_3_L14	Ga0208433_1001500	4	84.34	96.5274	17	23.5294
vSAG_88_3_L14	Ga0208643_1000678	4	84.31	99.8339	17	23.5294
vSAG_88_3_L14	Ga0208643_1001043	4	85.0925	99.3818	17	23.5294
vSAG_88_3_L14	Ga0208644_1000112	4	85.455	99.3307	17	23.5294
vSAG_88_3_L14	Ga0208644_1003664	4	83.62	98.379	17	23.5294
vSAG_88_3_L14	Ga0208645_1011155	4	83.125	98.0903	17	23.5294
vSAG_88_3_L14	Ga0208660_1000673	4	83.3375	99.1981	17	23.5294
vSAG_88_3_L14	Ga0208666_1000540	4	87.7825	100.403	17	23.5294
vSAG_88_3_L14	Ga0208666_1002018	4	89.475	100.771	17	23.5294
vSAG_88_3_L14	Ga0208767_1002313	4	85.255	97.8892	17	23.5294
vSAG_88_3_L14	Ga0208790_1004634	4	90.4525	97.613	17	23.5294
vSAG_88_3_L14	Ga0208793_1000325	4	83.46	96.477	17	23.5294
vSAG_88_3_L14	Ga0208813_1001768	4	92.4025	99.9466	17	23.5294
vSAG_88_3_L14	Ga0208814_1004238	4	88.89	100.739	17	23.5294
vSAG_88_3_L14	Ga0208899_1000762	4	85.455	99.3307	17	23.5294
vSAG_88_3_L14	Ga0208899_1002069	4	84.175	99.4185	17	23.5294
vSAG_88_3_L14	Ga0208899_1002242	4	85.255	97.8892	17	23.5294
vSAG_88_3_L14	Ga0208899_1002360	4	81.66	98.2351	17	23.5294
vSAG_88_3_L14	Ga0208899_1003563	4	82.1525	98.4175	17	23.5294
vSAG_88_3_L14	Ga0208919_1000727	4	86.44	98.4127	17	23.5294
vSAG_88_3_L14	Ga0208919_1000728	4	86.0875	98.5464	17	23.5294
vSAG_88_3_L14	Ga0208919_1001831	4	87.2775	98.6859	17	23.5294
vSAG_88_3_L14	Ga0209087_1000237	4	83.2225	98.2736	17	23.5294
vSAG_88_3_L14	Ga0209087_1004741	4	84.2025	98.5772	17	23.5294
vSAG_88_3_L14	Ga0209193_1001641	4	86.3225	97.8071	17	23.5294
vSAG_88_3_L14	Ga0209279_10001387	4	89.5625	99.3884	17	23.5294
vSAG_88_3_L14	Ga0209298_10001372	4	83.195	98.4666	17	23.5294
vSAG_88_3_L14	Ga0209299_1000281	4	83.195	98.4666	17	23.5294
vSAG_88_3_L14	Ga0209309_10000315	4	85.45	99.5809	17	23.5294
vSAG_88_3_L14	Ga0209335_10012317	4	83.4625	97.5996	17	23.5294
vSAG_88_3_L14	Ga0209337_1001881	4	85.7575	99.3808	17	23.5294
vSAG_88_3_L14	Ga0209348_1001136	4	83.3075	98.5729	17	23.5294
vSAG_88_3_L14	Ga0209348_1002900	4	90.74	99.4308	17	23.5294
vSAG_88_3_L14	Ga0209348_1004163	4	90.51	97.4753	17	23.5294
vSAG_88_3_L14	Ga0209384_1003661	4	89.195	100.555	17	23.5294
vSAG_88_3_L14	Ga0209406_1000566	4	85.45	99.5809	17	23.5294
vSAG_88_3_L14	Ga0209532_1000306	4	83.64	95.4849	17	23.5294
vSAG_88_3_L14	Ga0209535_1001845	4	85.6475	99.6972	17	23.5294
vSAG_88_3_L14	Ga0209603_1001879	4	85.45	99.5809	17	23.5294
vSAG_88_3_L14	Ga0209630_10001272	4	83.64	95.4849	17	23.5294
vSAG_88_3_L14	Ga0209634_1008766	4	89.1675	99.8754	17	23.5294
vSAG_88_3_L14	Ga0209634_1010643	4	83.6575	98.6731	17	23.5294
vSAG_88_3_L14	Ga0209634_1011187	4	88.1175	99.7131	17	23.5294
vSAG_88_3_L14	Ga0209657_1000180	4	89.3525	100.678	17	23.5294
vSAG_88_3_L14	Ga0209715_1000159	4	85.45	99.5809	17	23.5294
vSAG_88_3_L14	Ga0209716_1000720	4	85.45	99.5809	17	23.5294
vSAG_88_3_L14	Ga0209757_10000059	4	82.425	98.3892	17	23.5294
vSAG_88_3_L14	Ga0209757_10000380	4	83.2825	99.514	17	23.5294
vSAG_88_3_L14	Ga0209816_1005133	4	87.3675	100.136	17	23.5294
vSAG_88_3_L14	Ga0209816_1010200	4	87.605	99.6069	17	23.5294
vSAG_88_3_L14	Ga0209992_10001352	4	88.5	98.9428	17	23.5294
vSAG_88_3_L14	Ga0211475_10000289	4	83.64	95.4849	17	23.5294
vSAG_88_3_L14	Ga0211477_10001006	4	85.785	97.4939	17	23.5294
vSAG_88_3_L14	Ga0211477_10003503	4	89.82	99.7793	17	23.5294
vSAG_88_3_L14	Ga0211516_10000138	4	83.64	95.4849	17	23.5294
vSAG_88_3_L14	Ga0211517_1000104	4	83.64	95.4849	17	23.5294
vSAG_88_3_L14	Ga0211530_1002180	4	89.3275	99.5914	17	23.5294
vSAG_88_3_L14	Ga0211537_1003105	4	89.745	99.5914	17	23.5294
vSAG_88_3_L14	Ga0211580_10000101	4	84.8925	96.0277	17	23.5294
vSAG_88_3_L14	Ga0222714_10002278	4	84.32	97.9074	17	23.5294
vSAG_88_3_L14	Ga0224906_1001164	4	85.58	99.7806	17	23.5294
vSAG_88_3_L14	Ga0224906_1003278	4	84.0275	98.6062	17	23.5294
vSAG_88_3_L14	Ga0233429_1013337	4	89.4725	100.451	17	23.5294
vSAG_88_3_L14	Ga0233439_10006138	4	83.3625	99.6835	17	23.5294
vSAG_88_3_L14	Ga0233450_10002854	4	84.685	98.6755	17	23.5294
vSAG_88_3_L14	Ga0233451_10003344	4	84.685	98.6755	17	23.5294
vSAG_88_3_L14	Ga0255752_10005039	4	84.685	98.6755	17	23.5294
vSAG_88_3_L14	Ga0255756_1004616	4	84.685	98.6755	17	23.5294
vSAG_88_3_L14	Ga0255758_10002901	4	84.685	98.6755	17	23.5294
vSAG_88_3_L14	Ga0255759_10000919	4	85.435	97.8938	17	23.5294
vSAG_88_3_L14	Ga0255769_10003506	4	84.8025	98.6755	17	23.5294
vSAG_88_3_L14	Ga0255771_1003654	4	84.685	98.6755	17	23.5294
vSAG_88_3_L14	Ga0255773_10001812	4	84.685	98.6755	17	23.5294
vSAG_88_3_L14	Ga0255783_10003809	4	84.685	98.6755	17	23.5294
vSAG_88_3_L14	Ga0308010_1005658	4	88.7075	99.8892	17	23.5294
vSAG_88_3_L14	Ga0308013_10005679	4	89.5625	99.3884	17	23.5294
vSAG_88_3_L14	JGI24514J20073_1000159	4	83.97	95.553	17	23.5294
vSAG_88_3_L14	JGI24524J20080_1000972	4	87.53	99.0841	17	23.5294
vSAG_88_3_L14	JGI26238J51125_1001289	4	90.2675	100.165	17	23.5294
vSAG_88_3_L14	JGI26380J51729_10003034	4	88.0625	100.03	17	23.5294
vSAG_88_3_L14	KVWGV2_10327882	4	83.7175	98.8379	17	23.5294
vSAG_88_3_L14	LP_F_10_SI03_120DRAFT_1003848	4	88.735	101.025	17	23.5294
vSAG_88_3_L14	SI39nov09_100mDRAFT_1002620	4	89.4	100.452	17	23.5294
vSAG_88_3_L14	Station123_MXL_ALL_assembly_NODE_222_length_47266_cov_24,736883	4	85.0075	97.8998	17	23.5294
vSAG_30_E13	Ga0114898_1000086	11	89.3127	99.5165	48	22.9167
vSAG_30_E13	Ga0114905_1000416	11	89.4227	99.3828	48	22.9167
vSAG_30_E13	Ga0208179_1000337	11	89.2527	99.6559	48	22.9167
vSAG_30_F21	Ga0098054_1004927	8	93.9812	99.885	35	22.8571
vSAG_30_F21	Ga0133547_10095586	8	95.1112	99.7299	35	22.8571
vSAG_30_F21	Ga0163108_10006429	8	93.2763	101.026	35	22.8571
vSAG_30_F21	Ga0310345_10002427	8	97.3938	99.945	35	22.8571
vSAG_88_3_K16	DelMOSpr2010_c10000200	5	84.686	98.7716	22	22.7273
vSAG_88_3_K16	DelMOSum2010_c10006927	5	99.768	100	22	22.7273
vSAG_88_3_K16	DelMOWin2010_c10003878	5	87.496	99.6319	22	22.7273
vSAG_88_3_K16	Ga0063241_1001520	5	88.694	99.994	22	22.7273
vSAG_88_3_K16	Ga0065861_1010333	5	99.732	100	22	22.7273
vSAG_88_3_K16	Ga0066224_1028503	5	95.474	100	22	22.7273
vSAG_88_3_K16	Ga0070745_1005413	5	87.742	99.6495	22	22.7273
vSAG_88_3_K16	Ga0098041_1004030	5	86.102	96.8432	22	22.7273
vSAG_88_3_K16	Ga0098043_1000957	5	88.63	99.917	22	22.7273
vSAG_88_3_K16	Ga0099847_1000783	5	87.32	97.2941	22	22.7273
vSAG_88_3_K16	Ga0114900_1000464	5	85.844	98.5063	22	22.7273
vSAG_88_3_K16	Ga0114901_1000278	5	85.844	98.5063	22	22.7273
vSAG_88_3_K16	Ga0114903_1000205	5	85.844	98.5063	22	22.7273
vSAG_88_3_K16	Ga0114918_10002175	5	89.286	99.917	22	22.7273
vSAG_88_3_K16	Ga0114994_10008290	5	99.522	100	22	22.7273
vSAG_88_3_K16	Ga0115000_10001924	5	99.452	100	22	22.7273
vSAG_88_3_K16	Ga0115547_1000753	5	86.704	99.6495	22	22.7273
vSAG_88_3_K16	Ga0115549_1000657	5	88.814	99.4933	22	22.7273
vSAG_88_3_K16	Ga0115550_1003583	5	89.19	99.5582	22	22.7273
vSAG_88_3_K16	Ga0115556_1005502	5	89.198	99.4836	22	22.7273
vSAG_88_3_K16	Ga0129324_10001975	5	89.178	99.5608	22	22.7273
vSAG_88_3_K16	Ga0181401_1003488	5	87.492	98.5676	22	22.7273
vSAG_88_3_K16	Ga0181402_1001018	5	87.382	99.6863	22	22.7273
vSAG_88_3_K16	Ga0181403_1000038	5	89.188	100.03	22	22.7273
vSAG_88_3_K16	Ga0181403_1000585	5	87.492	98.8835	22	22.7273
vSAG_88_3_K16	Ga0181405_1000188	5	88.736	100.031	22	22.7273
vSAG_88_3_K16	Ga0181405_1000721	5	95.696	100	22	22.7273
vSAG_88_3_K16	Ga0181580_10006582	5	89.722	99.9584	22	22.7273
vSAG_88_3_K16	Ga0181585_10006650	5	89.722	99.9584	22	22.7273
vSAG_88_3_K16	Ga0183755_1000464	5	87.814	98.8279	22	22.7273
vSAG_88_3_K16	Ga0208019_1000764	5	89.314	99.9523	22	22.7273
vSAG_88_3_K16	Ga0208029_1000093	5	85.818	98.6747	22	22.7273
vSAG_88_3_K16	Ga0208030_1000186	5	85.818	98.6747	22	22.7273
vSAG_88_3_K16	Ga0208134_1001996	5	86.846	97.6953	22	22.7273
vSAG_88_3_K16	Ga0208160_1000314	5	89.314	99.9523	22	22.7273
vSAG_88_3_K16	Ga0208160_1002563	5	89.912	99.9584	22	22.7273
vSAG_88_3_K16	Ga0208161_1002121	5	89.87	99.9584	22	22.7273
vSAG_88_3_K16	Ga0208162_1000674	5	89.122	100.108	22	22.7273
vSAG_88_3_K16	Ga0208180_1000470	5	85.818	98.6747	22	22.7273
vSAG_88_3_K16	Ga0208181_1000210	5	85.818	98.6747	22	22.7273
vSAG_88_3_K16	Ga0208298_1001170	5	88.036	97.8041	22	22.7273
vSAG_88_3_K16	Ga0208449_1000154	5	85.818	98.6747	22	22.7273
vSAG_88_3_K16	Ga0208450_1000154	5	85.818	98.6747	22	22.7273
vSAG_88_3_K16	Ga0208545_1000039	5	86.722	97.6953	22	22.7273
vSAG_88_3_K16	Ga0208643_1000899	5	86.722	97.6953	22	22.7273
vSAG_88_3_K16	Ga0208684_1000157	5	85.818	98.6747	22	22.7273
vSAG_88_3_K16	Ga0208767_1001728	5	90.454	99.9584	22	22.7273
vSAG_88_3_K16	Ga0208767_1002749	5	89.28	100.108	22	22.7273
vSAG_88_3_K16	Ga0208767_1002909	5	87.788	97.8041	22	22.7273
vSAG_88_3_K16	Ga0208791_1000071	5	87.834	97.8041	22	22.7273
vSAG_88_3_K16	Ga0208793_1000555	5	87.834	97.8041	22	22.7273
vSAG_88_3_K16	Ga0208795_1000735	5	89.558	100	22	22.7273
vSAG_88_3_K16	Ga0208813_1000279	5	85.818	98.6747	22	22.7273
vSAG_88_3_K16	Ga0208814_1003525	5	96.986	100	22	22.7273
vSAG_88_3_K16	Ga0208899_1001402	5	89.28	100.108	22	22.7273
vSAG_88_3_K16	Ga0208899_1003202	5	89.912	99.9584	22	22.7273
vSAG_88_3_K16	Ga0208919_1001510	5	87.866	97.8041	22	22.7273
vSAG_88_3_K16	Ga0208934_1000136	5	85.818	98.6747	22	22.7273
vSAG_88_3_K16	Ga0209094_1000568	5	89.23	100.03	22	22.7273
vSAG_88_3_K16	Ga0209193_1000585	5	88.822	100.034	22	22.7273
vSAG_88_3_K16	Ga0209232_1000481	5	83.842	98.1397	22	22.7273
vSAG_88_3_K16	Ga0209304_1003027	5	88.354	99.9277	22	22.7273
vSAG_88_3_K16	Ga0210003_1006757	5	89.308	99.9584	22	22.7273
vSAG_88_3_K16	Ga0222717_10000219	5	95.468	100	22	22.7273
vSAG_88_3_K16	Ga0222718_10004217	5	89.226	100.03	22	22.7273
vSAG_88_3_K16	Ga0255768_10009566	5	89.32	100	22	22.7273
vSAG_88_3_K16	JGI25132J35274_1000408	5	89.44	100.066	22	22.7273
vSAG_88_3_K16	JGI25132J35274_1000456	5	88.292	97.2941	22	22.7273
vSAG_88_3_K16	Station138_SUR_ALL_assembly_NODE_96_length_39839_cov_27,754022	5	85.672	99.1984	22	22.7273
vSAG_88_3_K16	Station155_MES_ALL_assembly_NODE_2549_length_31931_cov_75,437696	5	88.668	96.8746	22	22.7273
vSAG_88_3_K16	Station188_SUR_ALL_assembly_NODE_1273_length_39787_cov_15,820774	5	84.548	98.7716	22	22.7273
vSAG_88_3_K16	Station191_SUR_ALL_assembly_NODE_556_length_35085_cov_4,177134_1	5	84.676	98.7716	22	22.7273
vSAG_88_3_K16	Station194_DCM_ALL_assembly_NODE_984_length_39336_cov_7,844098	5	84.676	98.7716	22	22.7273
vSAG_88_3_K16	Station194_SUR_ALL_assembly_NODE_453_length_50770_cov_96,920931	5	84.812	99.8374	22	22.7273
vSAG_88_3_K16	Station194_SUR_ALL_assembly_NODE_946_length_32154_cov_7,773607	5	84.676	98.7716	22	22.7273
vSAG_88_3_K16	Station70_SUR_ALL_assembly_NODE_254_length_56773_cov_12,536585	5	86.228	99.4812	22	22.7273
vSAG_88_3_K16	Station72_SUR_ALL_assembly_NODE_193_length_45177_cov_4,353464	5	85.356	99.4712	22	22.7273
vSAG_88_3_K16	Station82_SUR_COMBINED_FINAL_NODE_753_length_36455_cov_10,571621_1	5	84.78	99.1466	22	22.7273
vSAG_30_J17	Ga0208134_1000046	17	86.0688	99.5452	75	22.6667
vSAG_86_3_F4	DelMOSpr2010_c10003436	4	82.94	100.487	18	22.2222
vSAG_86_3_F4	DelMOSpr2010_c10009420	4	84.68	100	18	22.2222
vSAG_86_3_F4	DelMOSum2010_c10009185	4	83.855	100	18	22.2222
vSAG_86_3_F4	DelMOWin2010_c10007244	4	81.6	100.487	18	22.2222
vSAG_86_3_F4	DelMOWin2010_c10011341	4	82.94	100.487	18	22.2222
vSAG_86_3_F4	Ga0070748_1005065	4	82.94	100.487	18	22.2222
vSAG_86_3_F4	Ga0070750_10008292	4	82.94	100.487	18	22.2222
vSAG_86_3_F4	Ga0073579_1191399	4	92.19	100	18	22.2222
vSAG_86_3_F4	Ga0073579_1191618	4	85.42	100	18	22.2222
vSAG_86_3_F4	Ga0075468_10000709	4	82.94	100.487	18	22.2222
vSAG_86_3_F4	Ga0075480_10001183	4	82.94	100.487	18	22.2222
vSAG_86_3_F4	Ga0098037_1002003	4	81.635	100.203	18	22.2222
vSAG_86_3_F4	Ga0098037_1002270	4	85.455	100.627	18	22.2222
vSAG_86_3_F4	Ga0098038_1002828	4	85.455	100.627	18	22.2222
vSAG_86_3_F4	Ga0098038_1002858	4	83.445	100.698	18	22.2222
vSAG_86_3_F4	Ga0098040_1003778	4	90.575	99.8795	18	22.2222
vSAG_86_3_F4	Ga0098042_1001027	4	81.635	100.698	18	22.2222
vSAG_86_3_F4	Ga0098043_1000239	4	81.635	100.698	18	22.2222
vSAG_86_3_F4	Ga0098043_1001695	4	85.385	100.698	18	22.2222
vSAG_86_3_F4	Ga0098043_1002234	4	80.98	100.698	18	22.2222
vSAG_86_3_F4	Ga0098060_1000719	4	83.41	100.522	18	22.2222
vSAG_86_3_F4	Ga0110931_1002247	4	84.035	100.149	18	22.2222
vSAG_86_3_F4	Ga0114905_1004937	4	94.62	100	18	22.2222
vSAG_86_3_F4	Ga0114906_1007027	4	93.82	100	18	22.2222
vSAG_86_3_F4	Ga0114908_1004556	4	94.15	100	18	22.2222
vSAG_86_3_F4	Ga0114909_1003419	4	94.045	100	18	22.2222
vSAG_86_3_F4	Ga0114914_1000795	4	80.53	100.241	18	22.2222
vSAG_86_3_F4	Ga0114933_10012273	4	82.53	100.698	18	22.2222
vSAG_86_3_F4	Ga0160423_10016042	4	84.935	100.698	18	22.2222
vSAG_86_3_F4	Ga0180120_10007024	4	82.84	100.488	18	22.2222
vSAG_86_3_F4	Ga0181386_1001878	4	85.505	100.706	18	22.2222
vSAG_86_3_F4	Ga0181397_1001161	4	81.035	100.7	18	22.2222
vSAG_86_3_F4	Ga0181398_1001843	4	83.89	96.4286	18	22.2222
vSAG_86_3_F4	Ga0181407_1000449	4	81.56	100.7	18	22.2222
vSAG_86_3_F4	Ga0181408_1000382	4	81.56	100.7	18	22.2222
vSAG_86_3_F4	Ga0183683_1000069	4	85.105	100.7	18	22.2222
vSAG_86_3_F4	Ga0183683_1000405	4	81.605	100.488	18	22.2222
vSAG_86_3_F4	Ga0183748_1000875	4	85.755	100.487	18	22.2222
vSAG_86_3_F4	Ga0183748_1002660	4	85.81	95.8461	18	22.2222
vSAG_86_3_F4	Ga0183748_1003649	4	85.975	100.629	18	22.2222
vSAG_86_3_F4	Ga0183748_1006866	4	83.37	100.413	18	22.2222
vSAG_86_3_F4	Ga0183755_1001231	4	83.69	100.7	18	22.2222
vSAG_86_3_F4	Ga0183755_1001474	4	85.565	100.7	18	22.2222
vSAG_86_3_F4	Ga0183755_1006651	4	85.52	100.7	18	22.2222
vSAG_86_3_F4	Ga0183757_1001598	4	85.745	96.25	18	22.2222
vSAG_86_3_F4	Ga0183757_1001663	4	80.95	100	18	22.2222
vSAG_86_3_F4	Ga0183757_1003266	4	85.105	100.7	18	22.2222
vSAG_86_3_F4	Ga0183757_1003668	4	84.21	100	18	22.2222
vSAG_86_3_F4	Ga0187220_1003054	4	80.91	96.4286	18	22.2222
vSAG_86_3_F4	Ga0196889_1001366	4	82.84	100.487	18	22.2222
vSAG_86_3_F4	Ga0208134_1000338	4	82.84	100.488	18	22.2222
vSAG_86_3_F4	Ga0208134_1005540	4	81.395	100.7	18	22.2222
vSAG_86_3_F4	Ga0208148_1000230	4	82.84	100.487	18	22.2222
vSAG_86_3_F4	Ga0208157_1000997	4	85.38	100.629	18	22.2222
vSAG_86_3_F4	Ga0208157_1001786	4	81.53	100.7	18	22.2222
vSAG_86_3_F4	Ga0208157_1003911	4	84.47	100.7	18	22.2222
vSAG_86_3_F4	Ga0208158_1001168	4	84.47	100.7	18	22.2222
vSAG_86_3_F4	Ga0208159_1002855	4	83.8	100.629	18	22.2222
vSAG_86_3_F4	Ga0208159_1003271	4	81.605	100.487	18	22.2222
vSAG_86_3_F4	Ga0208182_1001391	4	94.58	100	18	22.2222
vSAG_86_3_F4	Ga0208449_1002162	4	94.58	100	18	22.2222
vSAG_86_3_F4	Ga0208449_1003616	4	94.185	98.6381	18	22.2222
vSAG_86_3_F4	Ga0208545_1000522	4	82.84	100.488	18	22.2222
vSAG_86_3_F4	Ga0208545_1001896	4	81.46	100.7	18	22.2222
vSAG_86_3_F4	Ga0208643_1000826	4	82.84	100.488	18	22.2222
vSAG_86_3_F4	Ga0208666_1000975	4	85.38	100.629	18	22.2222
vSAG_86_3_F4	Ga0208666_1001204	4	81.53	100.7	18	22.2222
vSAG_86_3_F4	Ga0208669_1001157	4	81.415	98.5075	18	22.2222
vSAG_86_3_F4	Ga0208684_1001954	4	94.58	100	18	22.2222
vSAG_86_3_F4	Ga0208767_1001568	4	82.84	100.487	18	22.2222
vSAG_86_3_F4	Ga0208898_1006087	4	82.815	96.9697	18	22.2222
vSAG_86_3_F4	Ga0208899_1001278	4	82.84	100.488	18	22.2222
vSAG_86_3_F4	Ga0208919_1000302	4	85.38	100.629	18	22.2222
vSAG_86_3_F4	Ga0208919_1005105	4	85.725	100.7	18	22.2222
vSAG_86_3_F4	Ga0208919_1005738	4	83.125	100.786	18	22.2222
vSAG_86_3_F4	Ga0209194_1006229	4	82.76	97.841	18	22.2222
vSAG_86_3_F4	Ga0209232_1004551	4	83.415	100.629	18	22.2222
vSAG_86_3_F4	Ga0209348_1002512	4	84.665	100.319	18	22.2222
vSAG_86_3_F4	Ga0209349_1000769	4	92.905	100	18	22.2222
vSAG_86_3_F4	Ga0209535_1002375	4	85.245	100.7	18	22.2222
vSAG_86_3_F4	Ga0209634_1007424	4	83.335	97.5692	18	22.2222
vSAG_86_3_F4	Ga0209645_1002386	4	90.915	100	18	22.2222
vSAG_86_3_F4	Ga0209645_1003540	4	85.435	100.487	18	22.2222
vSAG_86_3_F4	Ga0209816_1004513	4	83.475	100.006	18	22.2222
vSAG_86_3_F4	Ga0209992_10004491	4	80.975	100.334	18	22.2222
vSAG_86_3_F4	Ga0209992_10009853	4	81.79	100.316	18	22.2222
vSAG_86_3_F4	Ga0211708_10002996	4	82.355	100.7	18	22.2222
vSAG_86_3_F4	Ga0211708_10003584	4	85.905	100.629	18	22.2222
vSAG_86_3_F4	Ga0222714_10004835	4	81.48	96.4286	18	22.2222
vSAG_86_3_F4	Ga0222715_10016748	4	84.38	96.9697	18	22.2222
vSAG_86_3_F4	JGI20158J14315_10002528	4	81.6	100.487	18	22.2222
vSAG_86_3_F4	JGI25132J35274_1000901	4	85.515	100.487	18	22.2222
vSAG_86_3_F4	Station102_DCM_ALL_assembly_NODE_740_length_25289_cov_16,134224	4	84.415	100.698	18	22.2222
vSAG_86_3_F4	Station102_SUR_SMARTER_KIT_NODE_39_length_41417_cov_31,057251	4	84.935	100.698	18	22.2222
vSAG_86_3_F4	Station33_SUR_ALL_assembly_NODE_358_length_31276_cov_14,272701	4	82.53	100.698	18	22.2222
vSAG_27_D11	Ga0163179_10001886	7	85.7157	99.8334	32	21.875
vSAG_27_D11	Ga0209404_10000152	7	86.3614	100.307	32	21.875
vSAG_27_G23	Ga0063391_1000281	3	88.0967	93.4272	14	21.4286
vSAG_30_J17	Ga0183683_1000064	16	88.2075	98.5824	75	21.3333
vSAG_30_J17	Ga0183755_1000022	16	84.8169	99.4476	75	21.3333
vSAG_30_J17	Ga0209482_1000092	16	86.7369	99.1357	75	21.3333
vSAG_30_J17	Station125_SUR_ALL_assembly_NODE_138_length_58184_cov_98,667292	16	86.6094	99.5159	75	21.3333
vSAG_30_E13	Station76_MES_COMBINED_FINAL_NODE_2223_length_26164_cov_6,635528	10	89.733	101.088	48	20.8333
vSAG_88_3_G20	DelMOSpr2010_c10004025	5	85.708	100.236	24	20.8333
vSAG_88_3_G20	Ga0063042_102625	5	90.04	99.7274	24	20.8333
vSAG_88_3_G20	Ga0066848_10001877	5	92.426	98.4818	24	20.8333
vSAG_88_3_G20	Ga0068470_1119744	5	89.938	98.9547	24	20.8333
vSAG_88_3_G20	Ga0068471_1062303	5	92.152	99.989	24	20.8333
vSAG_88_3_G20	Ga0068471_1088135	5	88.268	99.823	24	20.8333
vSAG_88_3_G20	Ga0068471_1098896	5	90.812	100.066	24	20.8333
vSAG_88_3_G20	Ga0068471_1105969	5	89.802	99.478	24	20.8333
vSAG_88_3_G20	Ga0068471_1117359	5	90.49	99.6825	24	20.8333
vSAG_88_3_G20	Ga0068471_1119026	5	91.464	99.5745	24	20.8333
vSAG_88_3_G20	Ga0068471_1163541	5	90.706	99.6825	24	20.8333
vSAG_88_3_G20	Ga0068471_1169928	5	92.902	100.573	24	20.8333
vSAG_88_3_G20	Ga0068471_1200001	5	90.484	98.3285	24	20.8333
vSAG_88_3_G20	Ga0068481_1188556	5	89.084	99.7797	24	20.8333
vSAG_88_3_G20	Ga0068482_1141100	5	88.554	99.8739	24	20.8333
vSAG_88_3_G20	Ga0068482_1176090	5	88.214	100.567	24	20.8333
vSAG_88_3_G20	Ga0068482_1198026	5	89.346	99.6517	24	20.8333
vSAG_88_3_G20	Ga0068482_1241087	5	91.674	100	24	20.8333
vSAG_88_3_G20	Ga0068502_1154560	5	89.516	100.107	24	20.8333
vSAG_88_3_G20	Ga0068502_1166684	5	92.39	98.8294	24	20.8333
vSAG_88_3_G20	Ga0068503_10175859	5	90.974	98.5484	24	20.8333
vSAG_88_3_G20	Ga0068503_10185265	5	87.986	99.5344	24	20.8333
vSAG_88_3_G20	Ga0068503_10196786	5	89.086	99.8739	24	20.8333
vSAG_88_3_G20	Ga0068503_10201779	5	94.584	97.5288	24	20.8333
vSAG_88_3_G20	Ga0068503_10212187	5	91.71	100.527	24	20.8333
vSAG_88_3_G20	Ga0068503_10256703	5	83.716	98.2243	24	20.8333
vSAG_88_3_G20	Ga0068503_10277601	5	93.698	99.9064	24	20.8333
vSAG_88_3_G20	Ga0068503_10282132	5	94.948	99.7403	24	20.8333
vSAG_88_3_G20	Ga0068503_10302813	5	94.356	99.9115	24	20.8333
vSAG_88_3_G20	Ga0068503_10303744	5	88.51	99.4349	24	20.8333
vSAG_88_3_G20	Ga0068503_10306561	5	87.478	97.4359	24	20.8333
vSAG_88_3_G20	Ga0068503_10306605	5	92.678	99.6722	24	20.8333
vSAG_88_3_G20	Ga0068503_10306924	5	92.068	100.328	24	20.8333
vSAG_88_3_G20	Ga0068503_10307439	5	90.906	98.5268	24	20.8333
vSAG_88_3_G20	Ga0068503_10319528	5	85.988	99.6528	24	20.8333
vSAG_88_3_G20	Ga0068503_10429802	5	89.41	100.109	24	20.8333
vSAG_88_3_G20	Ga0068503_10437409	5	94.162	99.8919	24	20.8333
vSAG_88_3_G20	Ga0070749_10002964	5	85.708	100.236	24	20.8333
vSAG_88_3_G20	Ga0070751_1001766	5	83.452	96.9755	24	20.8333
vSAG_88_3_G20	Ga0070754_10002564	5	85.58	100.236	24	20.8333
vSAG_88_3_G20	Ga0073579_1191566	5	85.462	98.689	24	20.8333
vSAG_88_3_G20	Ga0098034_1002906	5	92.336	98.4786	24	20.8333
vSAG_88_3_G20	Ga0098035_1002813	5	92.23	98.3448	24	20.8333
vSAG_88_3_G20	Ga0098036_1002112	5	87.638	98.3638	24	20.8333
vSAG_88_3_G20	Ga0098037_1001368	5	87.07	99.1407	24	20.8333
vSAG_88_3_G20	Ga0104999_1008891	5	90.94	100.348	24	20.8333
vSAG_88_3_G20	Ga0105010_1003750	5	84.536	100.606	24	20.8333
vSAG_88_3_G20	Ga0105011_1008695	5	90.964	100.348	24	20.8333
vSAG_88_3_G20	Ga0105012_1015370	5	89.754	100.867	24	20.8333
vSAG_88_3_G20	Ga0105015_1008355	5	90.906	100.348	24	20.8333
vSAG_88_3_G20	Ga0105016_1017922	5	90.94	100.348	24	20.8333
vSAG_88_3_G20	Ga0105018_1004621	5	84.232	100.822	24	20.8333
vSAG_88_3_G20	Ga0105019_1013717	5	91.342	99.464	24	20.8333
vSAG_88_3_G20	Ga0105023_1000209	5	84.594	99.8638	24	20.8333
vSAG_88_3_G20	Ga0105023_1006505	5	90.94	100.348	24	20.8333
vSAG_88_3_G20	Ga0110931_1001403	5	87.13	98.9827	24	20.8333
vSAG_88_3_G20	Ga0114899_1006232	5	90.464	99.3052	24	20.8333
vSAG_88_3_G20	Ga0114902_1000662	5	84.504	99.0298	24	20.8333
vSAG_88_3_G20	Ga0114902_1002687	5	84.206	99.5214	24	20.8333
vSAG_88_3_G20	Ga0114905_1001341	5	85.046	99.0682	24	20.8333
vSAG_88_3_G20	Ga0114908_1001087	5	84.504	99.1257	24	20.8333
vSAG_88_3_G20	Ga0114910_1000337	5	84.504	99.0298	24	20.8333
vSAG_88_3_G20	Ga0114912_1002190	5	87.034	97.4733	24	20.8333
vSAG_88_3_G20	Ga0114933_10007913	5	87.64	99.8572	24	20.8333
vSAG_88_3_G20	Ga0115650_1023115	5	91.316	100.316	24	20.8333
vSAG_88_3_G20	Ga0115651_1009354	5	90.774	100.44	24	20.8333
vSAG_88_3_G20	Ga0115652_1005023	5	90.812	100.348	24	20.8333
vSAG_88_3_G20	Ga0115657_1009912	5	90.774	100.44	24	20.8333
vSAG_88_3_G20	Ga0115657_1012744	5	89.164	100.368	24	20.8333
vSAG_88_3_G20	Ga0115661_1005023	5	90.812	100.348	24	20.8333
vSAG_88_3_G20	Ga0115662_1017923	5	90.94	100.348	24	20.8333
vSAG_88_3_G20	Ga0117901_1018398	5	91.932	99.138	24	20.8333
vSAG_88_3_G20	Ga0117920_1006290	5	90.94	100.348	24	20.8333
vSAG_88_3_G20	Ga0117922_1007731	5	90.94	100.348	24	20.8333
vSAG_88_3_G20	Ga0118712_1009912	5	90.774	100.44	24	20.8333
vSAG_88_3_G20	Ga0118712_1012744	5	89.164	100.368	24	20.8333
vSAG_88_3_G20	Ga0118715_1018398	5	91.932	99.138	24	20.8333
vSAG_88_3_G20	Ga0118716_1007919	5	90.774	100.44	24	20.8333
vSAG_88_3_G20	Ga0118717_1009354	5	90.774	100.44	24	20.8333
vSAG_88_3_G20	Ga0118718_1023115	5	91.316	100.316	24	20.8333
vSAG_88_3_G20	Ga0129324_10001221	5	84.366	99.8692	24	20.8333
vSAG_88_3_G20	Ga0181401_1000797	5	84.662	100.058	24	20.8333
vSAG_88_3_G20	Ga0181407_1000774	5	84.244	99.4136	24	20.8333
vSAG_88_3_G20	Ga0181409_1000899	5	84.244	99.4136	24	20.8333
vSAG_88_3_G20	Ga0181414_1000303	5	82.99	99.5701	24	20.8333
vSAG_88_3_G20	Ga0183757_1001168	5	85.33	98.2268	24	20.8333
vSAG_88_3_G20	Ga0183757_1003910	5	89.882	96.9211	24	20.8333
vSAG_88_3_G20	Ga0196889_1000008	5	83.122	99.8409	24	20.8333
vSAG_88_3_G20	Ga0196891_1000003	5	82.158	99.6699	24	20.8333
vSAG_88_3_G20	Ga0196891_1000095	5	83.126	99.9433	24	20.8333
vSAG_88_3_G20	Ga0206125_10011307	5	84.266	100.404	24	20.8333
vSAG_88_3_G20	Ga0207896_1000014	5	82.086	97.6172	24	20.8333
vSAG_88_3_G20	Ga0207901_1000183	5	86.188	96.8301	24	20.8333
vSAG_88_3_G20	Ga0207906_1000168	5	84.334	96.8301	24	20.8333
vSAG_88_3_G20	Ga0207986_1001352	5	84.338	99.9426	24	20.8333
vSAG_88_3_G20	Ga0207988_1001933	5	82.746	99.9416	24	20.8333
vSAG_88_3_G20	Ga0208013_1001410	5	87.75	99.3147	24	20.8333
vSAG_88_3_G20	Ga0208029_1000434	5	84.668	99.2672	24	20.8333
vSAG_88_3_G20	Ga0208029_1001992	5	90.28	100.29	24	20.8333
vSAG_88_3_G20	Ga0208029_1002261	5	89.24	97.5002	24	20.8333
vSAG_88_3_G20	Ga0208029_1002439	5	88.636	99.2065	24	20.8333
vSAG_88_3_G20	Ga0208029_1002878	5	88.388	99.6598	24	20.8333
vSAG_88_3_G20	Ga0208030_1001026	5	84.004	99.3162	24	20.8333
vSAG_88_3_G20	Ga0208030_1003220	5	83.768	98.4682	24	20.8333
vSAG_88_3_G20	Ga0208030_1004134	5	88.004	99.0142	24	20.8333
vSAG_88_3_G20	Ga0208032_1001796	5	88.692	101.291	24	20.8333
vSAG_88_3_G20	Ga0208134_1001054	5	85.752	98.0079	24	20.8333
vSAG_88_3_G20	Ga0208149_1000837	5	85.752	98.0079	24	20.8333
vSAG_88_3_G20	Ga0208149_1001958	5	85.894	100.013	24	20.8333
vSAG_88_3_G20	Ga0208150_1000862	5	85.752	98.0079	24	20.8333
vSAG_88_3_G20	Ga0208157_1003342	5	93.26	100.062	24	20.8333
vSAG_88_3_G20	Ga0208179_1001628	5	85.046	99.3044	24	20.8333
vSAG_88_3_G20	Ga0208180_1000615	5	84.668	99.2672	24	20.8333
vSAG_88_3_G20	Ga0208180_1001984	5	85.212	99.5728	24	20.8333
vSAG_88_3_G20	Ga0208180_1002094	5	83.488	98.548	24	20.8333
vSAG_88_3_G20	Ga0208180_1003595	5	90.772	100	24	20.8333
vSAG_88_3_G20	Ga0208181_1000513	5	84.486	99.2672	24	20.8333
vSAG_88_3_G20	Ga0208181_1001176	5	84.004	99.3162	24	20.8333
vSAG_88_3_G20	Ga0208181_1003014	5	90.686	99.4565	24	20.8333
vSAG_88_3_G20	Ga0208182_1002424	5	88.626	99.2065	24	20.8333
vSAG_88_3_G20	Ga0208182_1003551	5	87.8	99.6078	24	20.8333
vSAG_88_3_G20	Ga0208183_1000990	5	84.256	100.048	24	20.8333
vSAG_88_3_G20	Ga0208298_1002117	5	87.75	99.3147	24	20.8333
vSAG_88_3_G20	Ga0208299_1000168	5	85.224	97.9724	24	20.8333
vSAG_88_3_G20	Ga0208299_1000240	5	85.224	97.9724	24	20.8333
vSAG_88_3_G20	Ga0208299_1001312	5	86.862	99.3274	24	20.8333
vSAG_88_3_G20	Ga0208299_1001476	5	83.416	99.7833	24	20.8333
vSAG_88_3_G20	Ga0208315_1000928	5	84.572	99.1588	24	20.8333
vSAG_88_3_G20	Ga0208315_1002936	5	88.612	99.2065	24	20.8333
vSAG_88_3_G20	Ga0208315_1003742	5	92.032	100.131	24	20.8333
vSAG_88_3_G20	Ga0208316_1000414	5	84.668	99.2672	24	20.8333
vSAG_88_3_G20	Ga0208316_1002461	5	84.236	99.079	24	20.8333
vSAG_88_3_G20	Ga0208316_1004923	5	90.86	99.977	24	20.8333
vSAG_88_3_G20	Ga0208425_1000012	5	85.412	98.7322	24	20.8333
vSAG_88_3_G20	Ga0208425_1000015	5	82.158	99.6699	24	20.8333
vSAG_88_3_G20	Ga0208425_1000320	5	83.126	99.9433	24	20.8333
vSAG_88_3_G20	Ga0208428_1001080	5	85.752	98.0079	24	20.8333
vSAG_88_3_G20	Ga0208434_1000390	5	87.75	99.3147	24	20.8333
vSAG_88_3_G20	Ga0208449_1000176	5	84.486	99.2672	24	20.8333
vSAG_88_3_G20	Ga0208449_1001488	5	84.838	99.8826	24	20.8333
vSAG_88_3_G20	Ga0208449_1004227	5	90.06	99.5235	24	20.8333
vSAG_88_3_G20	Ga0208449_1005162	5	91.758	100	24	20.8333
vSAG_88_3_G20	Ga0208450_1000324	5	84.668	99.2672	24	20.8333
vSAG_88_3_G20	Ga0208450_1001972	5	89.768	100.427	24	20.8333
vSAG_88_3_G20	Ga0208450_1002251	5	88.636	99.2065	24	20.8333
vSAG_88_3_G20	Ga0208450_1002822	5	84.012	98.4136	24	20.8333
vSAG_88_3_G20	Ga0208450_1004448	5	86.626	99.12	24	20.8333
vSAG_88_3_G20	Ga0208467_1000552	5	87.854	99.6391	24	20.8333
vSAG_88_3_G20	Ga0208543_1000015	5	82.158	99.6699	24	20.8333
vSAG_88_3_G20	Ga0208544_10000142	5	83.122	99.8409	24	20.8333
vSAG_88_3_G20	Ga0208553_1000814	5	92.414	98.6468	24	20.8333
vSAG_88_3_G20	Ga0208643_1000700	5	83.122	99.8409	24	20.8333
vSAG_88_3_G20	Ga0208644_1000090	5	82.158	99.6699	24	20.8333
vSAG_88_3_G20	Ga0208644_1008103	5	85.656	100.013	24	20.8333
vSAG_88_3_G20	Ga0208645_1002542	5	84.48	96.6287	24	20.8333
vSAG_88_3_G20	Ga0208645_1003332	5	83.982	98.1265	24	20.8333
vSAG_88_3_G20	Ga0208668_1001205	5	92.668	98.7114	24	20.8333
vSAG_88_3_G20	Ga0208684_1000532	5	85.054	99.3051	24	20.8333
vSAG_88_3_G20	Ga0208684_1004424	5	92.822	100	24	20.8333
vSAG_88_3_G20	Ga0208684_1005450	5	91.36	98.5267	24	20.8333
vSAG_88_3_G20	Ga0208767_1000089	5	82.158	99.6699	24	20.8333
vSAG_88_3_G20	Ga0208767_1001351	5	83.126	99.9433	24	20.8333
vSAG_88_3_G20	Ga0208767_1006004	5	85.894	100.013	24	20.8333
vSAG_88_3_G20	Ga0208790_1003669	5	85.058	98.4162	24	20.8333
vSAG_88_3_G20	Ga0208790_1004634	5	91.26	97.3961	24	20.8333
vSAG_88_3_G20	Ga0208813_1002658	5	86.636	99.2982	24	20.8333
vSAG_88_3_G20	Ga0208813_1002722	5	87.884	99.2853	24	20.8333
vSAG_88_3_G20	Ga0208814_1001139	5	83.142	100.439	24	20.8333
vSAG_88_3_G20	Ga0208899_1001633	5	83.126	99.9433	24	20.8333
vSAG_88_3_G20	Ga0208899_1006414	5	85.894	100.013	24	20.8333
vSAG_88_3_G20	Ga0208919_1001189	5	86.296	100.08	24	20.8333
vSAG_88_3_G20	Ga0208919_1001831	5	87.278	98.4381	24	20.8333
vSAG_88_3_G20	Ga0208919_1002288	5	88.624	97.3949	24	20.8333
vSAG_88_3_G20	Ga0208919_1004428	5	88.862	99.6632	24	20.8333
vSAG_88_3_G20	Ga0209128_1000236	5	82.732	100.479	24	20.8333
vSAG_88_3_G20	Ga0209128_1002210	5	83.814	99.4088	24	20.8333
vSAG_88_3_G20	Ga0209128_1005140	5	89.142	98.1581	24	20.8333
vSAG_88_3_G20	Ga0209279_10002298	5	86.004	99.7229	24	20.8333
vSAG_88_3_G20	Ga0209279_10002366	5	88.14	99.5702	24	20.8333
vSAG_88_3_G20	Ga0209337_1001512	5	84.272	99.438	24	20.8333
vSAG_88_3_G20	Ga0209348_1000957	5	81.934	100.078	24	20.8333
vSAG_88_3_G20	Ga0209348_1003190	5	87.534	97.3973	24	20.8333
vSAG_88_3_G20	Ga0209362_1002879	5	90.442	100.449	24	20.8333
vSAG_88_3_G20	Ga0209383_1007662	5	88.432	99.8166	24	20.8333
vSAG_88_3_G20	Ga0209535_1005019	5	89.316	99.4411	24	20.8333
vSAG_88_3_G20	Ga0209634_1002533	5	84.296	99.438	24	20.8333
vSAG_88_3_G20	Ga0209634_1011471	5	88.194	99.549	24	20.8333
vSAG_88_3_G20	Ga0209666_1004897	5	86.524	97.5966	24	20.8333
vSAG_88_3_G20	Ga0209756_1000945	5	84.262	100.254	24	20.8333
vSAG_88_3_G20	Ga0209756_1006766	5	85.422	99.6347	24	20.8333
vSAG_88_3_G20	Ga0209816_1002547	5	81.904	100.508	24	20.8333
vSAG_88_3_G20	Ga0209816_1005133	5	86.072	99.6737	24	20.8333
vSAG_88_3_G20	Ga0209816_1005549	5	86.642	99.2122	24	20.8333
vSAG_88_3_G20	Ga0209992_10004006	5	86.822	98.9115	24	20.8333
vSAG_88_3_G20	Ga0209992_10011855	5	90.376	99.5188	24	20.8333
vSAG_88_3_G20	Ga0211560_1001677	5	88.478	99.2727	24	20.8333
vSAG_88_3_G20	Ga0211574_10001549	5	83.448	99.4981	24	20.8333
vSAG_88_3_G20	Ga0212024_1000001	5	82.158	99.6699	24	20.8333
vSAG_88_3_G20	Ga0224906_1002577	5	87.486	100.28	24	20.8333
vSAG_88_3_G20	Ga0233433_10000799	5	82.444	100.192	24	20.8333
vSAG_88_3_G20	Ga0233438_10004830	5	83.606	99.9127	24	20.8333
vSAG_88_3_G20	Ga0233439_10000540	5	82.444	100.192	24	20.8333
vSAG_88_3_G20	Ga0256381_1000217	5	87.12	97.3671	24	20.8333
vSAG_88_3_G20	Ga0257121_1004113	5	92.018	98.9589	24	20.8333
vSAG_88_3_G20	Ga0257121_1005772	5	86.556	99.51	24	20.8333
vSAG_88_3_G20	Ga0308016_10006541	5	87.714	99.8743	24	20.8333
vSAG_88_3_G20	JGI24514J20073_1000159	5	84.172	96.549	24	20.8333
vSAG_88_3_G20	JGI25134J35505_10000276	5	82.768	100.242	24	20.8333
vSAG_88_3_G20	JGI26238J51125_1001289	5	90.236	100.055	24	20.8333
vSAG_88_3_G20	JGI26380J51729_10003034	5	90.254	99.8701	24	20.8333
vSAG_88_3_G20	PicMicro_10023004	5	87.768	100.109	24	20.8333
vSAG_88_3_G20	SI34jun09_120mDRAFT_1001489	5	90.462	100.138	24	20.8333
vSAG_88_3_G20	SI39nov09_120mDRAFT_c1001268	5	90.148	100.138	24	20.8333
vSAG_88_3_G20	SI47jul10_120mDRAFT_c1000514	5	82.482	99.9576	24	20.8333
vSAG_88_3_G20	Station30_DCM_ALL_assembly_NODE_155_length_51034_cov_133,668746	5	84.23	97.0755	24	20.8333
vSAG_88_3_G20	unknown_gi_486908286	5	84.67	99.1336	24	20.8333
vSAG_27_A8	Ga0098035_1002001	6	87.2267	99.1368	29	20.6897
vSAG_27_A8	Ga0098044_1003183	6	88.415	99.1081	29	20.6897
vSAG_27_A8	Ga0098061_1000393	6	90.14	99.2223	29	20.6897
vSAG_27_A8	Ga0115649_1013770	6	90.86	100.329	29	20.6897
vSAG_27_A8	Ga0115651_1006288	6	90.165	99.1179	29	20.6897
vSAG_27_A8	Ga0118710_1013770	6	90.86	100.329	29	20.6897
vSAG_27_A8	Ga0118717_1006288	6	90.165	99.1179	29	20.6897
vSAG_27_A8	Ga0163180_10004856	6	91.7717	98.815	29	20.6897
vSAG_27_A8	Ga0208012_1000534	6	89.34	101.534	29	20.6897
vSAG_27_A8	Ga0208013_1001259	6	88.2583	98.9955	29	20.6897
vSAG_27_A8	Ga0208013_1001536	6	89.34	101.534	29	20.6897
vSAG_27_A8	Ga0208669_1000585	6	90.335	98.8033	29	20.6897
vSAG_27_A8	Ga0209128_1000947	6	90.3617	99.5134	29	20.6897
vSAG_27_A8	Ga0209349_1002550	6	89.7783	99.0232	29	20.6897
vSAG_27_A8	Ga0209434_1000200	6	88.8283	99.0968	29	20.6897
vSAG_27_A8	Ga0209756_1000298	6	92.5967	100.342	29	20.6897
vSAG_27_A8	Ga0209756_1001571	6	94.9317	99.5749	29	20.6897
vSAG_27_A8	Ga0209756_1003064	6	90.3617	99.5134	29	20.6897
vSAG_27_A8	Ga0315326_10001548	6	92.2767	99.7699	29	20.6897
vSAG_27_A8	JGI25129J35166_1000624	6	99.9817	98.5448	29	20.6897
vSAG_27_A8	JGI25133J35611_10001255	6	90.4133	99.2481	29	20.6897
vSAG_27_A8	JGI25134J35505_10001159	6	92.9417	98.2497	29	20.6897
vSAG_27_A8	PicViral_1000147	6	88.7833	99.7312	29	20.6897
vSAG_27_A8	Station122_DCM_ALL_assembly_NODE_5_length_178986_cov_68,467437	6	85.7033	98.8182	29	20.6897
vSAG_27_A8	Station123_MXL_ALL_assembly_NODE_9_length_118427_cov_9,948848_1	6	85.7033	98.8979	29	20.6897
vSAG_27_A8	Station124_MXL_ALL_assembly_NODE_8_length_145096_cov_22,809723_1	6	85.7033	98.8182	29	20.6897
vSAG_27_A8	Station206_SUR_ALL_assembly_NODE_246_length_91889_cov_4,117092	6	93.6583	99.7312	29	20.6897
vSAG_88_3_D14	Ga0068503_10176822	6	92.0517	99.1618	29	20.6897
vSAG_88_3_D14	Ga0070754_10004354	6	86.7233	100.796	29	20.6897
vSAG_88_3_D14	Ga0098046_1002644	6	86.3983	100.624	29	20.6897
vSAG_88_3_D14	Ga0099847_1000480	6	86.8367	98.4994	29	20.6897
vSAG_88_3_D14	Ga0099849_1001863	6	87.0933	100.574	29	20.6897
vSAG_88_3_D14	Ga0114934_10005883	6	85.835	96.1025	29	20.6897
vSAG_88_3_D14	Ga0208158_1002892	6	90.28	98.3012	29	20.6897
vSAG_88_3_D14	Ga0208299_1001897	6	87.3433	99.274	29	20.6897
vSAG_88_3_D14	Ga0208645_1001242	6	86.3883	98.4864	29	20.6897
vSAG_88_3_D14	Ga0208645_1001462	6	86.3883	98.4864	29	20.6897
vSAG_30_F21	DelMOSpr2010_c10000952	7	86.7914	99.0492	35	20
vSAG_30_F21	DelMOSum2010_c10001096	7	86.7914	99.0492	35	20
vSAG_30_F21	Ga0098040_1003815	7	95.4871	100	35	20
vSAG_30_J17	Ga0181389_1000008	15	86.3367	98.8073	75	20
vSAG_30_J17	Station123_SUR_ALL_assembly_NODE_181_length_44600_cov_76,161836	15	84.414	98.2807	75	20
vSAG_30_J17	Station125_SUR_ALL_assembly_NODE_268_length_44708_cov_89,010212	15	84.39	98.2294	75	20
vSAG_88_3_B13	B570J29607_100041	2	85.695	98.8829	10	20
vSAG_88_3_B13	B570J40625_100012114	2	84.385	99.6688	10	20
vSAG_88_3_B13	B570J40625_100061439	2	86.02	98.8829	10	20
vSAG_88_3_B13	DelMOSpr2010_c10001367	2	83.295	94.697	10	20
vSAG_88_3_B13	DelMOSpr2010_c10003250	2	85.18	99.1807	10	20
vSAG_88_3_B13	DelMOSpr2010_c10003561	2	84.79	99.0259	10	20
vSAG_88_3_B13	DelMOSpr2010_c10004025	2	83.675	100.165	10	20
vSAG_88_3_B13	DelMOSpr2010_c10004063	2	85.475	100.496	10	20
vSAG_88_3_B13	DelMOSpr2010_c10004480	2	86.41	97.3518	10	20
vSAG_88_3_B13	DelMOSpr2010_c10006637	2	87.465	96.7585	10	20
vSAG_88_3_B13	DelMOSpr2010_c10007168	2	89	98.5721	10	20
vSAG_88_3_B13	DelMOSpr2010_c10009879	2	83.87	95.8333	10	20
vSAG_88_3_B13	DelMOSum2010_c10001062	2	82.425	98.2952	10	20
vSAG_88_3_B13	DelMOSum2010_c10001285	2	87.075	98.2529	10	20
vSAG_88_3_B13	DelMOSum2010_c10004794	2	87.895	100.34	10	20
vSAG_88_3_B13	DelMOSum2010_c10006452	2	85.38	100.665	10	20
vSAG_88_3_B13	DelMOSum2010_c10008933	2	88.17	97.9065	10	20
vSAG_88_3_B13	DelMOSum2010_c10010064	2	85.27	100	10	20
vSAG_88_3_B13	DelMOSum2010_c10011987	2	83.16	100.496	10	20
vSAG_88_3_B13	DelMOSum2010_c10013700	2	89.325	99.0721	10	20
vSAG_88_3_B13	DelMOSum2011_c10002753	2	87.075	98.2529	10	20
vSAG_88_3_B13	DelMOSum2011_c10003150	2	86.41	98.2529	10	20
vSAG_88_3_B13	DelMOSum2011_c10004861	2	83.16	100.496	10	20
vSAG_88_3_B13	DelMOSum2011_c10010167	2	88.275	100	10	20
vSAG_88_3_B13	DelMOWin2010_c10004327	2	86.41	98.2529	10	20
vSAG_88_3_B13	DelMOWin2010_c10009279	2	88.04	98.5485	10	20
vSAG_88_3_B13	DTR_629895	2	82.22	99.6183	10	20
vSAG_88_3_B13	DTR_893228	2	81.995	100.641	10	20
vSAG_88_3_B13	Flavobacteriia_gi_487372893	2	90.19	98.4065	10	20
vSAG_88_3_B13	G310J44882_10000257	2	84.975	99.191	10	20
vSAG_88_3_B13	Ga0008649_10007232	2	84.835	100.496	10	20
vSAG_88_3_B13	Ga0065726_16387	2	87.645	99.2062	10	20
vSAG_88_3_B13	Ga0065726_18035	2	85.685	99.1807	10	20
vSAG_88_3_B13	Ga0066222_1019306	2	85.455	99.074	10	20
vSAG_88_3_B13	Ga0066376_10006305	2	81.4	100.665	10	20
vSAG_88_3_B13	Ga0066833_10004463	2	94.575	100	10	20
vSAG_88_3_B13	Ga0066838_10003023	2	87.765	100.33	10	20
vSAG_88_3_B13	Ga0066847_10003626	2	87.765	100.33	10	20
vSAG_88_3_B13	Ga0066848_10001877	2	84.51	100.523	10	20
vSAG_88_3_B13	Ga0066848_10003598	2	87.765	100.33	10	20
vSAG_88_3_B13	Ga0066853_10004307	2	87.765	100.33	10	20
vSAG_88_3_B13	Ga0066864_10002967	2	90.27	99.3464	10	20
vSAG_88_3_B13	Ga0066868_10003784	2	87.765	100.33	10	20
vSAG_88_3_B13	Ga0068468_1001494	2	85.235	99.3548	10	20
vSAG_88_3_B13	Ga0068470_1105041	2	83.54	100.665	10	20
vSAG_88_3_B13	Ga0068470_1119744	2	85.005	99.8429	10	20
vSAG_88_3_B13	Ga0068471_1060440	2	94.185	99.6753	10	20
vSAG_88_3_B13	Ga0068471_1061607	2	84.51	100.496	10	20
vSAG_88_3_B13	Ga0068471_1068527	2	86.36	100.496	10	20
vSAG_88_3_B13	Ga0068471_1079351	2	83.7	100.665	10	20
vSAG_88_3_B13	Ga0068471_1079352	2	84.355	100.665	10	20
vSAG_88_3_B13	Ga0068471_1079353	2	83.865	100.665	10	20
vSAG_88_3_B13	Ga0068471_1084638	2	84.35	100.496	10	20
vSAG_88_3_B13	Ga0068471_1089742	2	97.395	100	10	20
vSAG_88_3_B13	Ga0068471_1091973	2	85.005	100.823	10	20
vSAG_88_3_B13	Ga0068471_1093035	2	97.715	100	10	20
vSAG_88_3_B13	Ga0068471_1094346	2	97.24	99.4792	10	20
vSAG_88_3_B13	Ga0068471_1101325	2	88.295	100.33	10	20
vSAG_88_3_B13	Ga0068471_1101326	2	88.13	100.33	10	20
vSAG_88_3_B13	Ga0068471_1105932	2	91.145	100	10	20
vSAG_88_3_B13	Ga0068471_1105969	2	87.74	99.5984	10	20
vSAG_88_3_B13	Ga0068471_1106070	2	84.675	100.496	10	20
vSAG_88_3_B13	Ga0068471_1117359	2	87.05	99.5074	10	20
vSAG_88_3_B13	Ga0068471_1119025	2	85.51	100.508	10	20
vSAG_88_3_B13	Ga0068471_1119026	2	85.98	100.496	10	20
vSAG_88_3_B13	Ga0068471_1125543	2	86.2	99.8377	10	20
vSAG_88_3_B13	Ga0068471_1127177	2	84.835	100.496	10	20
vSAG_88_3_B13	Ga0068471_1131996	2	83.225	100.793	10	20
vSAG_88_3_B13	Ga0068471_1142466	2	87.93	100.165	10	20
vSAG_88_3_B13	Ga0068471_1163541	2	85.575	99.5353	10	20
vSAG_88_3_B13	Ga0068471_1180169	2	86.03	99.3354	10	20
vSAG_88_3_B13	Ga0068471_1189896	2	86.29	100.496	10	20
vSAG_88_3_B13	Ga0068471_1190851	2	92.395	100	10	20
vSAG_88_3_B13	Ga0068471_1225889	2	84.84	100.992	10	20
vSAG_88_3_B13	Ga0068476_1112684	2	83.525	100.496	10	20
vSAG_88_3_B13	Ga0068478_1148306	2	89.74	100.385	10	20
vSAG_88_3_B13	Ga0068478_1151853	2	86.35	100.496	10	20
vSAG_88_3_B13	Ga0068478_1159595	2	97.225	100	10	20
vSAG_88_3_B13	Ga0068481_1188556	2	83.7	100.665	10	20
vSAG_88_3_B13	Ga0068481_1212220	2	85.21	99.8339	10	20
vSAG_88_3_B13	Ga0068482_1146218	2	96.265	100	10	20
vSAG_88_3_B13	Ga0068482_1301416	2	82.745	100.731	10	20
vSAG_88_3_B13	Ga0068486_1019914	2	89	100.98	10	20
vSAG_88_3_B13	Ga0068500_1110759	2	91.06	100.165	10	20
vSAG_88_3_B13	Ga0068500_1176513	2	88.44	100.165	10	20
vSAG_88_3_B13	Ga0068501_1106976	2	85.875	100.161	10	20
vSAG_88_3_B13	Ga0068502_1122126	2	85.045	100.161	10	20
vSAG_88_3_B13	Ga0068502_1134649	2	90.6	99.6752	10	20
vSAG_88_3_B13	Ga0068502_1137894	2	86.09	99.8333	10	20
vSAG_88_3_B13	Ga0068502_1149985	2	93.94	100.33	10	20
vSAG_88_3_B13	Ga0068502_1161202	2	80.915	100.165	10	20
vSAG_88_3_B13	Ga0068502_1162380	2	88.225	100.165	10	20
vSAG_88_3_B13	Ga0068502_1166615	2	90.56	100	10	20
vSAG_88_3_B13	Ga0068502_1166684	2	87.33	99.3708	10	20
vSAG_88_3_B13	Ga0068502_1176195	2	85.28	99.8398	10	20
vSAG_88_3_B13	Ga0068502_1181930	2	89.65	99.2064	10	20
vSAG_88_3_B13	Ga0068502_1191898	2	84.82	99.5109	10	20
vSAG_88_3_B13	Ga0068503_10175858	2	92.56	100	10	20
vSAG_88_3_B13	Ga0068503_10176826	2	86.415	95.2565	10	20
vSAG_88_3_B13	Ga0068503_10177493	2	84.025	100.665	10	20
vSAG_88_3_B13	Ga0068503_10180364	2	83.44	98.934	10	20
vSAG_88_3_B13	Ga0068503_10185264	2	83.865	100.665	10	20
vSAG_88_3_B13	Ga0068503_10185265	2	89.55	99.3421	10	20
vSAG_88_3_B13	Ga0068503_10196271	2	84.835	100.496	10	20
vSAG_88_3_B13	Ga0068503_10196273	2	86.64	100.165	10	20
vSAG_88_3_B13	Ga0068503_10196283	2	88.94	100	10	20
vSAG_88_3_B13	Ga0068503_10196320	2	84.235	99.8339	10	20
vSAG_88_3_B13	Ga0068503_10196321	2	85.365	100.496	10	20
vSAG_88_3_B13	Ga0068503_10196479	2	84.68	100.496	10	20
vSAG_88_3_B13	Ga0068503_10201706	2	88.13	100.33	10	20
vSAG_88_3_B13	Ga0068503_10201780	2	86.175	100.496	10	20
vSAG_88_3_B13	Ga0068503_10206053	2	88.255	100.33	10	20
vSAG_88_3_B13	Ga0068503_10209802	2	88.715	99.9483	10	20
vSAG_88_3_B13	Ga0068503_10210455	2	95.935	100	10	20
vSAG_88_3_B13	Ga0068503_10212599	2	82.655	99.2226	10	20
vSAG_88_3_B13	Ga0068503_10215147	2	88.785	100.33	10	20
vSAG_88_3_B13	Ga0068503_10221648	2	81.565	100.165	10	20
vSAG_88_3_B13	Ga0068503_10224460	2	89.925	100	10	20
vSAG_88_3_B13	Ga0068503_10224719	2	89.995	100	10	20
vSAG_88_3_B13	Ga0068503_10242198	2	85.165	100.496	10	20
vSAG_88_3_B13	Ga0068503_10248912	2	86.79	100.165	10	20
vSAG_88_3_B13	Ga0068503_10277601	2	85.86	100.665	10	20
vSAG_88_3_B13	Ga0068503_10290322	2	85.36	99.1776	10	20
vSAG_88_3_B13	Ga0068503_10291529	2	84.255	100.572	10	20
vSAG_88_3_B13	Ga0068503_10302813	2	84.79	100.496	10	20
vSAG_88_3_B13	Ga0068503_10303744	2	88.585	100.165	10	20
vSAG_88_3_B13	Ga0068503_10306533	2	83.7	100.496	10	20
vSAG_88_3_B13	Ga0068503_10306568	2	87.56	99.2029	10	20
vSAG_88_3_B13	Ga0068503_10306924	2	84.35	100.992	10	20
vSAG_88_3_B13	Ga0068503_10307216	2	86.2	99.8377	10	20
vSAG_88_3_B13	Ga0068503_10307218	2	85.38	99.8377	10	20
vSAG_88_3_B13	Ga0068503_10307434	2	84.885	99.4382	10	20
vSAG_88_3_B13	Ga0068503_10307439	2	92.62	97.3809	10	20
vSAG_88_3_B13	Ga0068503_10310729	2	88.96	99.3708	10	20
vSAG_88_3_B13	Ga0068503_10329932	2	87.595	100.327	10	20
vSAG_88_3_B13	Ga0068503_10438570	2	96.415	100	10	20
vSAG_88_3_B13	Ga0068503_10438582	2	85.49	100.496	10	20
vSAG_88_3_B13	Ga0068503_10442495	2	85.68	100.521	10	20
vSAG_88_3_B13	Ga0070431_1000739	2	91.565	99.1841	10	20
vSAG_88_3_B13	Ga0070431_1002928	2	86.735	98.2529	10	20
vSAG_88_3_B13	Ga0070431_1005373	2	85.95	97.5155	10	20
vSAG_88_3_B13	Ga0070745_1000529	2	81.285	99.2126	10	20
vSAG_88_3_B13	Ga0070745_1002538	2	83.455	99.3421	10	20
vSAG_88_3_B13	Ga0070745_1003076	2	86.405	99.8355	10	20
vSAG_88_3_B13	Ga0070745_1003639	2	85.855	98.2385	10	20
vSAG_88_3_B13	Ga0070745_1004960	2	85.54	100.665	10	20
vSAG_88_3_B13	Ga0070745_1005939	2	85.2	97.5676	10	20
vSAG_88_3_B13	Ga0070745_1007181	2	85.83	99.2062	10	20
vSAG_88_3_B13	Ga0070745_1007266	2	89.1	99.5275	10	20
vSAG_88_3_B13	Ga0070745_1008173	2	89.525	99.5194	10	20
vSAG_88_3_B13	Ga0070746_10000420	2	90.06	99.1841	10	20
vSAG_88_3_B13	Ga0070746_10001399	2	85.2	97.5676	10	20
vSAG_88_3_B13	Ga0070746_10002466	2	83.415	100.17	10	20
vSAG_88_3_B13	Ga0070746_10002778	2	83.78	99.3421	10	20
vSAG_88_3_B13	Ga0070746_10003030	2	86.88	97.1654	10	20
vSAG_88_3_B13	Ga0070746_10003494	2	83.515	100.665	10	20
vSAG_88_3_B13	Ga0070746_10007503	2	91.685	100.165	10	20
vSAG_88_3_B13	Ga0070746_10008962	2	88.55	100.005	10	20
vSAG_88_3_B13	Ga0070746_10009975	2	89.36	99.5194	10	20
vSAG_88_3_B13	Ga0070746_10010273	2	83.675	100.165	10	20
vSAG_88_3_B13	Ga0070746_10010784	2	85.225	100.003	10	20
vSAG_88_3_B13	Ga0070746_10011096	2	83.01	100.496	10	20
vSAG_88_3_B13	Ga0070746_10011349	2	86.02	98.2385	10	20
vSAG_88_3_B13	Ga0070747_1000312	2	90.06	99.1841	10	20
vSAG_88_3_B13	Ga0070747_1000733	2	86.88	97.1654	10	20
vSAG_88_3_B13	Ga0070747_1001211	2	90.64	99.6732	10	20
vSAG_88_3_B13	Ga0070747_1001707	2	91.685	100.165	10	20
vSAG_88_3_B13	Ga0070748_1000647	2	86.88	97.1654	10	20
vSAG_88_3_B13	Ga0070748_1003904	2	85.705	100.665	10	20
vSAG_88_3_B13	Ga0070749_10000529	2	86.88	97.1654	10	20
vSAG_88_3_B13	Ga0070749_10000624	2	90.06	99.1841	10	20
vSAG_88_3_B13	Ga0070749_10001618	2	89.645	98.1506	10	20
vSAG_88_3_B13	Ga0070749_10002964	2	83.675	100.165	10	20
vSAG_88_3_B13	Ga0070749_10003015	2	85.2	97.5676	10	20
vSAG_88_3_B13	Ga0070749_10005095	2	85.85	98.2385	10	20
vSAG_88_3_B13	Ga0070749_10005394	2	93.135	97.7923	10	20
vSAG_88_3_B13	Ga0070749_10006239	2	85.715	98.7955	10	20
vSAG_88_3_B13	Ga0070749_10007454	2	86.02	98.2385	10	20
vSAG_88_3_B13	Ga0070749_10007952	2	87.025	98.3769	10	20
vSAG_88_3_B13	Ga0070749_10012532	2	87.68	100.338	10	20
vSAG_88_3_B13	Ga0070749_10014391	2	89.36	99.5194	10	20
vSAG_88_3_B13	Ga0070750_10001706	2	85.785	97.5155	10	20
vSAG_88_3_B13	Ga0070750_10001707	2	83.415	100.17	10	20
vSAG_88_3_B13	Ga0070750_10001768	2	85.435	99.8513	10	20
vSAG_88_3_B13	Ga0070750_10002036	2	85.225	100.003	10	20
vSAG_88_3_B13	Ga0070750_10003014	2	86.88	97.1654	10	20
vSAG_88_3_B13	Ga0070750_10007126	2	85.2	97.5676	10	20
vSAG_88_3_B13	Ga0070750_10009301	2	81.845	99.6835	10	20
vSAG_88_3_B13	Ga0070751_1001123	2	81.285	99.2126	10	20
vSAG_88_3_B13	Ga0070751_1001308	2	86.02	98.2385	10	20
vSAG_88_3_B13	Ga0070751_1001766	2	87.725	98.8906	10	20
vSAG_88_3_B13	Ga0070751_1001900	2	85.435	99.8513	10	20
vSAG_88_3_B13	Ga0070751_1004488	2	85.2	97.5676	10	20
vSAG_88_3_B13	Ga0070751_1005468	2	85.705	100.665	10	20
vSAG_88_3_B13	Ga0070751_1007387	2	83.78	99.3421	10	20
vSAG_88_3_B13	Ga0070751_1008749	2	89.36	99.5194	10	20
vSAG_88_3_B13	Ga0070752_1002007	2	82.47	100.496	10	20
vSAG_88_3_B13	Ga0070752_1002683	2	84.505	99.5224	10	20
vSAG_88_3_B13	Ga0070752_1002799	2	85.665	99.2062	10	20
vSAG_88_3_B13	Ga0070752_1006200	2	83.78	99.3421	10	20
vSAG_88_3_B13	Ga0070752_1006239	2	82.47	97.8169	10	20
vSAG_88_3_B13	Ga0070752_1008068	2	87.725	98.8906	10	20
vSAG_88_3_B13	Ga0070752_1010333	2	89.305	97.4026	10	20
vSAG_88_3_B13	Ga0070753_1002823	2	86.02	98.2385	10	20
vSAG_88_3_B13	Ga0070753_1003848	2	85.2	97.5676	10	20
vSAG_88_3_B13	Ga0070753_1004162	2	89.1	99.5275	10	20
vSAG_88_3_B13	Ga0070753_1004250	2	89.2	98.8906	10	20
vSAG_88_3_B13	Ga0070753_1004780	2	85.54	100.665	10	20
vSAG_88_3_B13	Ga0070753_1005362	2	83.78	99.3421	10	20
vSAG_88_3_B13	Ga0070753_1006067	2	90.545	98.7097	10	20
vSAG_88_3_B13	Ga0070753_1007029	2	86.08	99.8355	10	20
vSAG_88_3_B13	Ga0070753_1007349	2	89.36	99.5194	10	20
vSAG_88_3_B13	Ga0070754_10001708	2	86.88	97.1654	10	20
vSAG_88_3_B13	Ga0070754_10001967	2	82.47	100.496	10	20
vSAG_88_3_B13	Ga0070754_10002564	2	83.675	100.165	10	20
vSAG_88_3_B13	Ga0070754_10010992	2	88.855	97.9065	10	20
vSAG_88_3_B13	Ga0070754_10012047	2	86.02	98.2385	10	20
vSAG_88_3_B13	Ga0070754_10012837	2	81.845	99.6835	10	20
vSAG_88_3_B13	Ga0072334_10397417	2	82.425	98.2952	10	20
vSAG_88_3_B13	Ga0073579_1189383	2	85.47	100.346	10	20
vSAG_88_3_B13	Ga0073579_1191566	2	91.44	97.742	10	20
vSAG_88_3_B13	Ga0074647_1000454	2	85.345	99.1807	10	20
vSAG_88_3_B13	Ga0074647_1000761	2	87.725	99.5194	10	20
vSAG_88_3_B13	Ga0074647_1000825	2	86.91	98.8731	10	20
vSAG_88_3_B13	Ga0074647_1001284	2	90.73	98.228	10	20
vSAG_88_3_B13	Ga0074647_1001680	2	85.685	99.1807	10	20
vSAG_88_3_B13	Ga0074647_1001697	2	84.89	98.8731	10	20
vSAG_88_3_B13	Ga0074647_1001893	2	88.455	99.1904	10	20
vSAG_88_3_B13	Ga0074647_1001951	2	85.315	100.496	10	20
vSAG_88_3_B13	Ga0074647_1002210	2	89.075	100.165	10	20
vSAG_88_3_B13	Ga0074647_1002468	2	88.95	100.165	10	20
vSAG_88_3_B13	Ga0074648_1002732	2	85.685	99.1807	10	20
vSAG_88_3_B13	Ga0074648_1002804	2	88.95	100.165	10	20
vSAG_88_3_B13	Ga0074648_1004364	2	87.725	99.5194	10	20
vSAG_88_3_B13	Ga0074648_1004896	2	82.695	96.0086	10	20
vSAG_88_3_B13	Ga0074648_1005185	2	92.175	100.165	10	20
vSAG_88_3_B13	Ga0074648_1005432	2	85.345	99.1807	10	20
vSAG_88_3_B13	Ga0074648_1006239	2	84.89	98.8731	10	20
vSAG_88_3_B13	Ga0074648_1006420	2	85.51	98.2385	10	20
vSAG_88_3_B13	Ga0074648_1008818	2	88.455	99.1904	10	20
vSAG_88_3_B13	Ga0074648_1012439	2	89.625	100.165	10	20
vSAG_88_3_B13	Ga0074648_1012968	2	87.89	99.5194	10	20
vSAG_88_3_B13	Ga0074648_1013101	2	91.03	100.165	10	20
vSAG_88_3_B13	Ga0074648_1013392	2	85.435	99.8513	10	20
vSAG_88_3_B13	Ga0074649_1002221	2	85.345	98.2385	10	20
vSAG_88_3_B13	Ga0074649_1002412	2	84.89	98.8731	10	20
vSAG_88_3_B13	Ga0074649_1002730	2	85.475	100.496	10	20
vSAG_88_3_B13	Ga0074649_1003047	2	88.95	100.165	10	20
vSAG_88_3_B13	Ga0074649_1003136	2	85.685	99.1807	10	20
vSAG_88_3_B13	Ga0074649_1003424	2	88.04	98.5485	10	20
vSAG_88_3_B13	Ga0074649_1003711	2	87.08	98.8731	10	20
vSAG_88_3_B13	Ga0074649_1004594	2	84.83	99.5224	10	20
vSAG_88_3_B13	Ga0074649_1005812	2	88.79	99.1904	10	20
vSAG_88_3_B13	Ga0074649_1006655	2	86.82	99.5224	10	20
vSAG_88_3_B13	Ga0074649_1007009	2	83.86	99.6732	10	20
vSAG_88_3_B13	Ga0074649_1007306	2	94.445	100	10	20
vSAG_88_3_B13	Ga0074649_1010051	2	85.005	97.4026	10	20
vSAG_88_3_B13	Ga0074649_1010531	2	84.575	99.6753	10	20
vSAG_88_3_B13	Ga0074649_1010790	2	84.94	98.2237	10	20
vSAG_88_3_B13	Ga0074649_1013112	2	91.615	98.8732	10	20
vSAG_88_3_B13	Ga0074649_1013174	2	86.37	100.17	10	20
vSAG_88_3_B13	Ga0074649_1013506	2	84.325	100.496	10	20
vSAG_88_3_B13	Ga0075109_1006936	2	86.05	98.5396	10	20
vSAG_88_3_B13	Ga0075116_10004418	2	88.67	99.3825	10	20
vSAG_88_3_B13	Ga0075117_1006256	2	87.405	100.496	10	20
vSAG_88_3_B13	Ga0075124_10004928	2	88.67	99.3825	10	20
vSAG_88_3_B13	Ga0075441_10001137	2	87.04	97.4999	10	20
vSAG_88_3_B13	Ga0075441_10004727	2	87.845	100.756	10	20
vSAG_88_3_B13	Ga0075441_10006201	2	88.82	100.165	10	20
vSAG_88_3_B13	Ga0075444_10004871	2	88.06	99.6732	10	20
vSAG_88_3_B13	Ga0075444_10010665	2	88.82	100.165	10	20
vSAG_88_3_B13	Ga0075445_10003718	2	87.04	97.4999	10	20
vSAG_88_3_B13	Ga0075445_10006004	2	84.915	95.3145	10	20
vSAG_88_3_B13	Ga0075446_10001233	2	85.55	100.17	10	20
vSAG_88_3_B13	Ga0075446_10001691	2	87.04	97.4999	10	20
vSAG_88_3_B13	Ga0075446_10001877	2	82.965	97.0931	10	20
vSAG_88_3_B13	Ga0075447_10002494	2	82.24	96.7056	10	20
vSAG_88_3_B13	Ga0075448_10003317	2	85.55	100.17	10	20
vSAG_88_3_B13	Ga0075458_10000119	2	81.285	99.2126	10	20
vSAG_88_3_B13	Ga0075460_10000627	2	81.285	99.2126	10	20
vSAG_88_3_B13	Ga0075460_10003506	2	85.435	99.8513	10	20
vSAG_88_3_B13	Ga0075460_10003536	2	89.1	99.5275	10	20
vSAG_88_3_B13	Ga0075461_10001436	2	89.1	100.165	10	20
vSAG_88_3_B13	Ga0075461_10002149	2	85.435	99.8513	10	20
vSAG_88_3_B13	Ga0075461_10002641	2	85.705	100.665	10	20
vSAG_88_3_B13	Ga0075462_10000090	2	90.06	99.1841	10	20
vSAG_88_3_B13	Ga0075462_10000413	2	86.88	97.1654	10	20
vSAG_88_3_B13	Ga0075462_10000737	2	88.63	100.165	10	20
vSAG_88_3_B13	Ga0075462_10001215	2	87.125	98.9433	10	20
vSAG_88_3_B13	Ga0075462_10002318	2	88.915	100.237	10	20
vSAG_88_3_B13	Ga0075462_10003134	2	87.025	98.3769	10	20
vSAG_88_3_B13	Ga0075462_10003546	2	85.435	99.8513	10	20
vSAG_88_3_B13	Ga0075463_10000114	2	81.285	99.2126	10	20
vSAG_88_3_B13	Ga0075463_10002286	2	85.475	100.496	10	20
vSAG_88_3_B13	Ga0075463_10003235	2	87.025	98.3769	10	20
vSAG_88_3_B13	Ga0075464_10003622	2	86.3	100.496	10	20
vSAG_88_3_B13	Ga0075466_1000393	2	90.06	99.1841	10	20
vSAG_88_3_B13	Ga0075466_1000908	2	86.88	97.1654	10	20
vSAG_88_3_B13	Ga0075467_10003885	2	85.54	100.665	10	20
vSAG_88_3_B13	Ga0075467_10007301	2	84.32	98.8717	10	20
vSAG_88_3_B13	Ga0075467_10007845	2	82.47	100.496	10	20
vSAG_88_3_B13	Ga0075468_10000424	2	86.88	97.1654	10	20
vSAG_88_3_B13	Ga0075469_10004921	2	90.84	99.5194	10	20
vSAG_88_3_B13	Ga0075474_10002504	2	85.435	99.8513	10	20
vSAG_88_3_B13	Ga0075475_10001166	2	85.435	99.8513	10	20
vSAG_88_3_B13	Ga0075475_10002227	2	85.83	99.2062	10	20
vSAG_88_3_B13	Ga0075475_10002917	2	86.195	99.1807	10	20
vSAG_88_3_B13	Ga0075475_10004689	2	88.04	98.5485	10	20
vSAG_88_3_B13	Ga0075475_10008189	2	85.755	100.665	10	20
vSAG_88_3_B13	Ga0075476_10001701	2	89.595	100.165	10	20
vSAG_88_3_B13	Ga0075476_10002520	2	85.435	99.8513	10	20
vSAG_88_3_B13	Ga0075477_10001192	2	85.435	99.8513	10	20
vSAG_88_3_B13	Ga0075477_10002465	2	86.915	99.6835	10	20
vSAG_88_3_B13	Ga0075477_10002718	2	84.32	98.8717	10	20
vSAG_88_3_B13	Ga0075478_10000654	2	83.675	100.165	10	20
vSAG_88_3_B13	Ga0075478_10001059	2	86.88	97.1654	10	20
vSAG_88_3_B13	Ga0075478_10002382	2	85.705	100.665	10	20
vSAG_88_3_B13	Ga0075478_10002555	2	84.89	98.8731	10	20
vSAG_88_3_B13	Ga0075478_10003232	2	85.435	99.8513	10	20
vSAG_88_3_B13	Ga0075478_10003498	2	87.645	99.2062	10	20
vSAG_88_3_B13	Ga0075479_10001112	2	85.435	99.8513	10	20
vSAG_88_3_B13	Ga0075479_10002784	2	84.89	98.8731	10	20
vSAG_88_3_B13	Ga0075479_10003871	2	90.225	99.3548	10	20
vSAG_88_3_B13	Ga0075479_10003885	2	85.705	100.665	10	20
vSAG_88_3_B13	Ga0075479_10006193	2	82.52	100	10	20
vSAG_88_3_B13	Ga0075480_10002371	2	85.435	99.8513	10	20
vSAG_88_3_B13	Ga0075480_10004310	2	81.99	99.6835	10	20
vSAG_88_3_B13	Ga0075480_10007345	2	86.88	97.1654	10	20
vSAG_88_3_B13	Ga0075480_10007806	2	85.705	100.665	10	20
vSAG_88_3_B13	Ga0075480_10013925	2	84.335	99.5224	10	20
vSAG_88_3_B13	Ga0075481_10000679	2	85.435	99.8513	10	20
vSAG_88_3_B13	Ga0078746_1000403	2	84	98.8717	10	20
vSAG_88_3_B13	Ga0078893_10013746	2	83.48	100.207	10	20
vSAG_88_3_B13	Ga0079300_10002243	2	84.06	99.6688	10	20
vSAG_88_3_B13	Ga0079957_1005268	2	85.045	99.6688	10	20
vSAG_88_3_B13	Ga0081594_1009871	2	83.93	99.8362	10	20
vSAG_88_3_B13	Ga0098034_1002906	2	84.535	100.521	10	20
vSAG_88_3_B13	Ga0098034_1003174	2	85.71	99.8339	10	20
vSAG_88_3_B13	Ga0098035_1002229	2	82.305	98.2672	10	20
vSAG_88_3_B13	Ga0098035_1002813	2	85.095	100.343	10	20
vSAG_88_3_B13	Ga0098035_1005028	2	84.97	99.5918	10	20
vSAG_88_3_B13	Ga0098036_1000084	2	86.545	97.1654	10	20
vSAG_88_3_B13	Ga0098036_1000201	2	90.02	100.019	10	20
vSAG_88_3_B13	Ga0098036_1000677	2	82.58	98.9132	10	20
vSAG_88_3_B13	Ga0098036_1000942	2	86.57	98.1913	10	20
vSAG_88_3_B13	Ga0098036_1001111	2	88.545	100.34	10	20
vSAG_88_3_B13	Ga0098036_1001676	2	85.835	99.8445	10	20
vSAG_88_3_B13	Ga0098036_1001766	2	91.35	100.165	10	20
vSAG_88_3_B13	Ga0098036_1002112	2	83.17	100.654	10	20
vSAG_88_3_B13	Ga0098036_1003489	2	91.82	99.8398	10	20
vSAG_88_3_B13	Ga0098036_1003613	2	89.9	99.1841	10	20
vSAG_88_3_B13	Ga0098036_1003784	2	86.975	100.496	10	20
vSAG_88_3_B13	Ga0098037_1000135	2	86.545	97.1654	10	20
vSAG_88_3_B13	Ga0098037_1001368	2	86.57	98.1913	10	20
vSAG_88_3_B13	Ga0098038_1000696	2	86.57	98.1913	10	20
vSAG_88_3_B13	Ga0098038_1003609	2	81.23	91.8495	10	20
vSAG_88_3_B13	Ga0098038_1003823	2	86.545	97.1654	10	20
vSAG_88_3_B13	Ga0098038_1004094	2	87.195	100.17	10	20
vSAG_88_3_B13	Ga0098038_1005339	2	91.205	95.7564	10	20
vSAG_88_3_B13	Ga0098041_1001006	2	90.02	100.019	10	20
vSAG_88_3_B13	Ga0098041_1001050	2	86.38	98.2385	10	20
vSAG_88_3_B13	Ga0098041_1001379	2	83.415	100.17	10	20
vSAG_88_3_B13	Ga0098041_1003190	2	86.53	97.7659	10	20
vSAG_88_3_B13	Ga0098042_1000091	2	90.02	100.019	10	20
vSAG_88_3_B13	Ga0098042_1000731	2	85.225	100.003	10	20
vSAG_88_3_B13	Ga0098042_1001188	2	87.055	97.1654	10	20
vSAG_88_3_B13	Ga0098042_1001878	2	85.18	100.165	10	20
vSAG_88_3_B13	Ga0098042_1002274	2	86.57	98.1913	10	20
vSAG_88_3_B13	Ga0098042_1003447	2	82.34	102.145	10	20
vSAG_88_3_B13	Ga0098042_1004067	2	83.705	97.2812	10	20
vSAG_88_3_B13	Ga0098043_1000784	2	84.65	98.8717	10	20
vSAG_88_3_B13	Ga0098043_1001354	2	85.485	98.1078	10	20
vSAG_88_3_B13	Ga0098043_1002717	2	85.225	100.003	10	20
vSAG_88_3_B13	Ga0098043_1003213	2	91.98	99.5194	10	20
vSAG_88_3_B13	Ga0098044_1002085	2	82.74	98.9132	10	20
vSAG_88_3_B13	Ga0098044_1004949	2	82.305	98.2672	10	20
vSAG_88_3_B13	Ga0098044_1006339	2	87.13	95.2865	10	20
vSAG_88_3_B13	Ga0098045_1000157	2	90.02	100.019	10	20
vSAG_88_3_B13	Ga0098045_1000643	2	84.65	98.8717	10	20
vSAG_88_3_B13	Ga0098045_1002288	2	86.41	98.2529	10	20
vSAG_88_3_B13	Ga0098045_1002817	2	89.92	100.163	10	20
vSAG_88_3_B13	Ga0098046_1000062	2	90.02	100.019	10	20
vSAG_88_3_B13	Ga0098046_1000196	2	84.65	98.8717	10	20
vSAG_88_3_B13	Ga0098046_1000748	2	85.71	100.17	10	20
vSAG_88_3_B13	Ga0098046_1002590	2	90.895	100.165	10	20
vSAG_88_3_B13	Ga0098047_10001425	2	87.11	100.496	10	20
vSAG_88_3_B13	Ga0098047_10001763	2	84.65	98.8717	10	20
vSAG_88_3_B13	Ga0098047_10002771	2	91.31	100.165	10	20
vSAG_88_3_B13	Ga0098048_1000276	2	90.02	100.019	10	20
vSAG_88_3_B13	Ga0098048_1000662	2	84.65	98.8717	10	20
vSAG_88_3_B13	Ga0098048_1002834	2	85.22	100.17	10	20
vSAG_88_3_B13	Ga0098048_1003363	2	86.41	98.2529	10	20
vSAG_88_3_B13	Ga0098049_1000223	2	90.02	100.019	10	20
vSAG_88_3_B13	Ga0098049_1001541	2	83.415	100.17	10	20
vSAG_88_3_B13	Ga0098049_1002096	2	84.65	98.8717	10	20
vSAG_88_3_B13	Ga0098049_1003048	2	82.58	98.9132	10	20
vSAG_88_3_B13	Ga0098049_1003508	2	85.71	100.17	10	20
vSAG_88_3_B13	Ga0098049_1004001	2	83.535	100.496	10	20
vSAG_88_3_B13	Ga0098050_1003430	2	86.41	98.2529	10	20
vSAG_88_3_B13	Ga0098051_1000452	2	86.41	98.2529	10	20
vSAG_88_3_B13	Ga0098052_1000968	2	90.35	99.5194	10	20
vSAG_88_3_B13	Ga0098052_1000986	2	82.255	98.9132	10	20
vSAG_88_3_B13	Ga0098052_1008095	2	87.44	100.33	10	20
vSAG_88_3_B13	Ga0098053_1000919	2	90.115	98.366	10	20
vSAG_88_3_B13	Ga0098053_1001317	2	82.355	100.665	10	20
vSAG_88_3_B13	Ga0098053_1001741	2	89.565	99.1841	10	20
vSAG_88_3_B13	Ga0098054_1002368	2	84.65	98.8717	10	20
vSAG_88_3_B13	Ga0098054_1003255	2	85.1	99.0561	10	20
vSAG_88_3_B13	Ga0098054_1003660	2	81.75	95.8714	10	20
vSAG_88_3_B13	Ga0098054_1004156	2	85.52	97.9324	10	20
vSAG_88_3_B13	Ga0098054_1005993	2	89.565	99.1841	10	20
vSAG_88_3_B13	Ga0098055_1002016	2	86.41	98.2529	10	20
vSAG_88_3_B13	Ga0098055_1003456	2	89.335	98.7097	10	20
vSAG_88_3_B13	Ga0098055_1006118	2	85.1	99.0561	10	20
vSAG_88_3_B13	Ga0098056_1001354	2	81.03	97.4638	10	20
vSAG_88_3_B13	Ga0098056_1003815	2	82.58	98.9132	10	20
vSAG_88_3_B13	Ga0098056_1004750	2	86.41	98.2529	10	20
vSAG_88_3_B13	Ga0098059_1000610	2	86.545	97.1654	10	20
vSAG_88_3_B13	Ga0098059_1002025	2	82.74	98.9132	10	20
vSAG_88_3_B13	Ga0098059_1002261	2	82.01	96.6555	10	20
vSAG_88_3_B13	Ga0098059_1005722	2	90.025	98.0263	10	20
vSAG_88_3_B13	Ga0098059_1005990	2	87.765	100.33	10	20
vSAG_88_3_B13	Ga0098060_1000119	2	85.225	99.3548	10	20
vSAG_88_3_B13	Ga0098060_1003809	2	83	100.496	10	20
vSAG_88_3_B13	Ga0098061_1001544	2	82.58	98.9132	10	20
vSAG_88_3_B13	Ga0098061_1002528	2	89.365	100.019	10	20
vSAG_88_3_B13	Ga0098061_1002539	2	90.35	99.5194	10	20
vSAG_88_3_B13	Ga0098061_1005703	2	87.765	100.33	10	20
vSAG_88_3_B13	Ga0098062_1002880	2	90.66	100.245	10	20
vSAG_88_3_B13	Ga0098066_1000398	2	90.705	100.165	10	20
vSAG_88_3_B13	Ga0098074_1000631	2	89.7	99.1696	10	20
vSAG_88_3_B13	Ga0098074_1001032	2	86.86	100.338	10	20
vSAG_88_3_B13	Ga0098074_1003525	2	86.735	98.2529	10	20
vSAG_88_3_B13	Ga0099675_1024177	2	84.355	99.6904	10	20
vSAG_88_3_B13	Ga0099693_1022848	2	84.19	99.356	10	20
vSAG_88_3_B13	Ga0099846_1001235	2	85.055	99.8471	10	20
vSAG_88_3_B13	Ga0099846_1002199	2	91.98	99.5194	10	20
vSAG_88_3_B13	Ga0099846_1002937	2	85.705	100.665	10	20
vSAG_88_3_B13	Ga0099846_1003994	2	84.32	98.8717	10	20
vSAG_88_3_B13	Ga0099846_1004160	2	89.67	100.396	10	20
vSAG_88_3_B13	Ga0099846_1005749	2	86.98	99.2062	10	20
vSAG_88_3_B13	Ga0099847_1000100	2	90.06	99.1841	10	20
vSAG_88_3_B13	Ga0099847_1000489	2	86.88	97.1654	10	20
vSAG_88_3_B13	Ga0099847_1001134	2	87.025	98.3769	10	20
vSAG_88_3_B13	Ga0099847_1001271	2	91.685	100.165	10	20
vSAG_88_3_B13	Ga0099847_1002573	2	89.69	98.8906	10	20
vSAG_88_3_B13	Ga0099847_1002802	2	87.315	99.2062	10	20
vSAG_88_3_B13	Ga0099847_1003916	2	84.89	98.2265	10	20
vSAG_88_3_B13	Ga0099847_1004026	2	85	100.665	10	20
vSAG_88_3_B13	Ga0099848_1001686	2	84.77	100.026	10	20
vSAG_88_3_B13	Ga0099848_1005230	2	86.82	99.5224	10	20
vSAG_88_3_B13	Ga0099848_1005253	2	86.02	98.2385	10	20
vSAG_88_3_B13	Ga0099849_1001350	2	85.055	99.8471	10	20
vSAG_88_3_B13	Ga0099849_1002333	2	93.615	100	10	20
vSAG_88_3_B13	Ga0099849_1004247	2	84.79	99.0259	10	20
vSAG_88_3_B13	Ga0099849_1005561	2	85	100.665	10	20
vSAG_88_3_B13	Ga0099849_1005784	2	87.645	99.2062	10	20
vSAG_88_3_B13	Ga0099849_1005890	2	91.49	99.3548	10	20
vSAG_88_3_B13	Ga0099849_1006017	2	85.54	100.665	10	20
vSAG_88_3_B13	Ga0099850_1002881	2	91.98	99.5194	10	20
vSAG_88_3_B13	Ga0099851_1001329	2	85.38	100.665	10	20
vSAG_88_3_B13	Ga0099851_1002168	2	84.32	98.8717	10	20
vSAG_88_3_B13	Ga0099851_1002296	2	91.98	99.5194	10	20
vSAG_88_3_B13	Ga0099851_1003274	2	84.79	99.0259	10	20
vSAG_88_3_B13	Ga0099851_1005006	2	87.315	99.2062	10	20
vSAG_88_3_B13	Ga0099851_1005450	2	85.055	99.8471	10	20
vSAG_88_3_B13	Ga0099972_12193713	2	84.39	99.2737	10	20
vSAG_88_3_B13	Ga0100226_1011997	2	84.19	99.356	10	20
vSAG_88_3_B13	Ga0100228_1024276	2	84.835	100.496	10	20
vSAG_88_3_B13	Ga0100228_1024734	2	89	100.98	10	20
vSAG_88_3_B13	Ga0100228_1030204	2	91.06	100.165	10	20
vSAG_88_3_B13	Ga0101094_10030	2	83.93	99.8362	10	20
vSAG_88_3_B13	Ga0101444_101747	2	84.005	96.2162	10	20
vSAG_88_3_B13	Ga0101444_110467	2	83.185	100.665	10	20
vSAG_88_3_B13	Ga0101444_110477	2	83.415	100.17	10	20
vSAG_88_3_B13	Ga0101550_1000156	2	83.93	99.8362	10	20
vSAG_88_3_B13	Ga0101552_1000030	2	83.93	99.8362	10	20
vSAG_88_3_B13	Ga0101554_1000508	2	83.93	99.8362	10	20
vSAG_88_3_B13	Ga0101560_1000606	2	83.93	99.8362	10	20
vSAG_88_3_B13	Ga0101644_1000097	2	83.93	99.8362	10	20
vSAG_88_3_B13	Ga0101646_1000030	2	83.93	99.8362	10	20
vSAG_88_3_B13	Ga0101649_1000112	2	83.93	99.8362	10	20
vSAG_88_3_B13	Ga0101728_100871	2	83.235	99.8339	10	20
vSAG_88_3_B13	Ga0101728_101450	2	83.41	99.8339	10	20
vSAG_88_3_B13	Ga0101728_104102	2	84.375	98.366	10	20
vSAG_88_3_B13	Ga0101728_104838	2	91.195	100	10	20
vSAG_88_3_B13	Ga0101874_100112	2	83.93	99.8362	10	20
vSAG_88_3_B13	Ga0102948_1004704	2	86.41	99.8445	10	20
vSAG_88_3_B13	Ga0102951_1002883	2	82.98	96.1384	10	20
vSAG_88_3_B13	Ga0102957_1002731	2	86.33	99.6732	10	20
vSAG_88_3_B13	Ga0102960_1004813	2	86.74	100.427	10	20
vSAG_88_3_B13	Ga0102963_1003101	2	90.165	99.6239	10	20
vSAG_88_3_B13	Ga0104986_1122	2	88.3	98.2089	10	20
vSAG_88_3_B13	Ga0104986_1300	2	86.565	98.5294	10	20
vSAG_88_3_B13	Ga0104986_1798	2	85.765	99.8513	10	20
vSAG_88_3_B13	Ga0104986_1948	2	85	100.496	10	20
vSAG_88_3_B13	Ga0104988_10845	2	85.765	99.8513	10	20
vSAG_88_3_B13	Ga0104999_1007693	2	90.705	100.165	10	20
vSAG_88_3_B13	Ga0104999_1008891	2	84.02	100.496	10	20
vSAG_88_3_B13	Ga0105010_1002753	2	90.705	100.165	10	20
vSAG_88_3_B13	Ga0105011_1002588	2	88.58	100.33	10	20
vSAG_88_3_B13	Ga0105011_1005246	2	91.345	99.6183	10	20
vSAG_88_3_B13	Ga0105011_1008695	2	84.02	100.496	10	20
vSAG_88_3_B13	Ga0105012_1000808	2	88.58	100.33	10	20
vSAG_88_3_B13	Ga0105012_1007475	2	90.705	100.165	10	20
vSAG_88_3_B13	Ga0105012_1015370	2	84.02	100.496	10	20
vSAG_88_3_B13	Ga0105015_1003660	2	90.705	100.165	10	20
vSAG_88_3_B13	Ga0105015_1008355	2	84.165	100.51	10	20
vSAG_88_3_B13	Ga0105016_1017922	2	84.02	100.496	10	20
vSAG_88_3_B13	Ga0105018_1001621	2	88.58	100.33	10	20
vSAG_88_3_B13	Ga0105019_1004320	2	88.58	100.33	10	20
vSAG_88_3_B13	Ga0105019_1006111	2	90.415	100.165	10	20
vSAG_88_3_B13	Ga0105019_1009004	2	90.705	100.165	10	20
vSAG_88_3_B13	Ga0105019_1013717	2	84.73	100.17	10	20
vSAG_88_3_B13	Ga0105023_1000209	2	90.705	100.165	10	20
vSAG_88_3_B13	Ga0105023_1006505	2	84.02	100.496	10	20
vSAG_88_3_B13	Ga0105050_10020429	2	84.545	99.6688	10	20
vSAG_88_3_B13	Ga0105050_10023994	2	87.875	96.9387	10	20
vSAG_88_3_B13	Ga0105051_10010553	2	84.545	99.6688	10	20
vSAG_88_3_B13	Ga0105051_10023028	2	87.875	96.9387	10	20
vSAG_88_3_B13	Ga0105052_10009508	2	84.545	99.6688	10	20
vSAG_88_3_B13	Ga0105052_10019322	2	87.875	96.9387	10	20
vSAG_88_3_B13	Ga0105096_10006062	2	86.02	98.8829	10	20
vSAG_88_3_B13	Ga0105096_10006424	2	84.225	99.6688	10	20
vSAG_88_3_B13	Ga0105548_1000030	2	83.93	99.8362	10	20
vSAG_88_3_B13	Ga0110929_1005294	2	86.03	97.9324	10	20
vSAG_88_3_B13	Ga0110931_1000441	2	86.57	98.1913	10	20
vSAG_88_3_B13	Ga0110931_1001403	2	90.415	98.0263	10	20
vSAG_88_3_B13	Ga0110931_1001611	2	88.755	100.356	10	20
vSAG_88_3_B13	Ga0110931_1002349	2	82.74	98.9132	10	20
vSAG_88_3_B13	Ga0110931_1003101	2	86.13	97.7326	10	20
vSAG_88_3_B13	Ga0110931_1003261	2	81.285	99.2126	10	20
vSAG_88_3_B13	Ga0110931_1003304	2	85.655	100.665	10	20
vSAG_88_3_B13	Ga0111031_1024576	2	84	98.8717	10	20
vSAG_88_3_B13	Ga0111034_1096680	2	89.365	100.019	10	20
vSAG_88_3_B13	Ga0114336_1004708	2	83.005	98.4564	10	20
vSAG_88_3_B13	Ga0114336_1008578	2	86.37	99.2144	10	20
vSAG_88_3_B13	Ga0114340_1007479	2	85.76	100.496	10	20
vSAG_88_3_B13	Ga0114340_1010444	2	88.925	93.7221	10	20
vSAG_88_3_B13	Ga0114346_1005947	2	86.37	99.2144	10	20
vSAG_88_3_B13	Ga0114350_1003694	2	83.93	99.2246	10	20
vSAG_88_3_B13	Ga0114351_1010728	2	85.6	99.8513	10	20
vSAG_88_3_B13	Ga0114351_1018372	2	87.4	100.496	10	20
vSAG_88_3_B13	Ga0114351_1040194	2	84.385	99.6688	10	20
vSAG_88_3_B13	Ga0114354_1004489	2	86.37	99.2144	10	20
vSAG_88_3_B13	Ga0114355_1005797	2	85.595	99.8513	10	20
vSAG_88_3_B13	Ga0114363_1008308	2	84.385	99.6688	10	20
vSAG_88_3_B13	Ga0114878_1009168	2	84.385	99.6688	10	20
vSAG_88_3_B13	Ga0114898_1003692	2	81.505	99.2226	10	20
vSAG_88_3_B13	Ga0114898_1003988	2	89.135	98.602	10	20
vSAG_88_3_B13	Ga0114898_1004590	2	84.56	99.8339	10	20
vSAG_88_3_B13	Ga0114898_1005012	2	90.61	100	10	20
vSAG_88_3_B13	Ga0114899_1005151	2	81.505	99.2226	10	20
vSAG_88_3_B13	Ga0114899_1006201	2	87.93	100.165	10	20
vSAG_88_3_B13	Ga0114899_1006232	2	84.615	100	10	20
vSAG_88_3_B13	Ga0114899_1006566	2	87.27	100	10	20
vSAG_88_3_B13	Ga0114900_1003592	2	84.56	99.8339	10	20
vSAG_88_3_B13	Ga0114900_1003840	2	87.735	98.5521	10	20
vSAG_88_3_B13	Ga0114900_1005049	2	90.8	99.5152	10	20
vSAG_88_3_B13	Ga0114900_1005436	2	89.135	98.602	10	20
vSAG_88_3_B13	Ga0114900_1006612	2	88.7	100	10	20
vSAG_88_3_B13	Ga0114901_1001991	2	81.505	99.2226	10	20
vSAG_88_3_B13	Ga0114902_1001316	2	89.08	100.165	10	20
vSAG_88_3_B13	Ga0114902_1001964	2	87.735	98.5521	10	20
vSAG_88_3_B13	Ga0114904_1002354	2	87.4	98.5521	10	20
vSAG_88_3_B13	Ga0114904_1005034	2	89.975	100	10	20
vSAG_88_3_B13	Ga0114905_1003681	2	86.945	99.8361	10	20
vSAG_88_3_B13	Ga0114905_1004674	2	87.735	98.5521	10	20
vSAG_88_3_B13	Ga0114905_1005627	2	84.755	99.517	10	20
vSAG_88_3_B13	Ga0114905_1005971	2	92.275	99.6753	10	20
vSAG_88_3_B13	Ga0114906_1001068	2	90.38	100.165	10	20
vSAG_88_3_B13	Ga0114906_1002616	2	89.24	100	10	20
vSAG_88_3_B13	Ga0114906_1003052	2	85.12	99.7981	10	20
vSAG_88_3_B13	Ga0114906_1004297	2	85.39	99.3548	10	20
vSAG_88_3_B13	Ga0114906_1006419	2	89.4	99.1841	10	20
vSAG_88_3_B13	Ga0114908_1001178	2	81.505	99.2226	10	20
vSAG_88_3_B13	Ga0114908_1001779	2	89.24	100	10	20
vSAG_88_3_B13	Ga0114908_1003954	2	90.92	99.8763	10	20
vSAG_88_3_B13	Ga0114909_1004154	2	84.185	100.496	10	20
vSAG_88_3_B13	Ga0114910_1002200	2	85.77	98.4069	10	20
vSAG_88_3_B13	Ga0114910_1004245	2	84.185	100.496	10	20
vSAG_88_3_B13	Ga0114910_1004317	2	84.29	100	10	20
vSAG_88_3_B13	Ga0114910_1005355	2	88.07	96.9966	10	20
vSAG_88_3_B13	Ga0114910_1005390	2	81.505	99.2226	10	20
vSAG_88_3_B13	Ga0114910_1005646	2	90.265	100.165	10	20
vSAG_88_3_B13	Ga0114911_1002092	2	86.945	99.8361	10	20
vSAG_88_3_B13	Ga0114911_1003891	2	81.695	98.8931	10	20
vSAG_88_3_B13	Ga0114911_1005117	2	87.93	100.165	10	20
vSAG_88_3_B13	Ga0114912_1000964	2	89.16	99.6732	10	20
vSAG_88_3_B13	Ga0114914_1000553	2	88.22	99.2029	10	20
[truncated: 133,827 more rows]
