# Supplementary material for: Into the Dark: Exploring the Deep Ocean with Single-Virus Genomics
Source: Viruses. 2022 Jul 21;14(7):1589. doi: 10.3390/v14071589 (PMC9322844; doi:10.3390/v14071589)
Supplement: Supplementary file 1 [file viruses-14-01589-s001.zip › TableS5-RelatedvSAGs.xlsx]

## Sheet: Table S5. Related vSAGs
deep vSAG (DvSAG)	IMGVR Scaffold ID	Hits	Sim	Qcov	DvSAG prots	%Shared proteins
DvSAG_27_A8	Abe_10000112	1	94.64	94.1176	29	3.44828
DvSAG_27_A8	Abe_10000942	7	87.0686	97.4846	29	24.1379
DvSAG_27_A8	Abe_10002311	1	90.08	99.1803	29	3.44828
DvSAG_27_A8	Abe_10002475	3	85.6967	98.4367	29	10.3448
DvSAG_27_A8	Abe_10002682	1	80.53	99.0115	29	3.44828
DvSAG_27_A8	DelMOSpr2010_c10002537	1	82.76	101.754	29	3.44828
DvSAG_27_A8	DelMOWin2010_c10000826	1	85.31	100	29	3.44828
DvSAG_27_A8	DelMOWin2010_c10002889	2	85.195	99.2593	29	6.89655
DvSAG_27_A8	DelMOWin2010_c10004679	1	81.82	100	29	3.44828
DvSAG_27_A8	DTR_888915	1	81.03	95.082	29	3.44828
DvSAG_27_A8	Ga0008650_1003269	1	89.42	99.0476	29	3.44828
DvSAG_27_A8	Ga0055584_100000729	2	81.03	94.1026	29	6.89655
DvSAG_27_A8	Ga0063391_1005679	1	80	100	29	3.44828
DvSAG_27_A8	Ga0066840_10000170	1	81.07	98.2558	29	3.44828
DvSAG_27_A8	Ga0070745_1001529	1	83.61	100.235	29	3.44828
DvSAG_27_A8	Ga0070745_1005754	2	87.37	99.578	29	6.89655
DvSAG_27_A8	Ga0070746_10000690	1	80.43	95.8333	29	3.44828
DvSAG_27_A8	Ga0070746_10005426	1	81.25	99.6721	29	3.44828
DvSAG_27_A8	Ga0070746_10006317	1	83.05	90.7692	29	3.44828
DvSAG_27_A8	Ga0070746_10007777	1	90.2	100	29	3.44828
DvSAG_27_A8	Ga0070746_10011372	3	86.62	96.3814	29	10.3448
DvSAG_27_A8	Ga0070749_10000761	1	83.24	98.4043	29	3.44828
DvSAG_27_A8	Ga0070752_1001460	1	91.76	100	29	3.44828
DvSAG_27_A8	Ga0070752_1001867	1	82.49	99.4382	29	3.44828
DvSAG_27_A8	Ga0070752_1003571	1	83.48	98.6784	29	3.44828
DvSAG_27_A8	Ga0070753_1001301	1	87.04	100	29	3.44828
DvSAG_27_A8	Ga0070753_1002789	2	84.045	95.6954	29	6.89655
DvSAG_27_A8	Ga0070753_1003344	4	88.94	99.7107	29	13.7931
DvSAG_27_A8	Ga0070753_1004192	1	85.39	98.8889	29	3.44828
DvSAG_27_A8	Ga0070754_10009627	1	83.71	98.3425	29	3.44828
DvSAG_27_A8	Ga0075444_10001682	1	80.6	100	29	3.44828
DvSAG_27_A8	Ga0075461_10001000	1	80.54	94.6032	29	3.44828
DvSAG_27_A8	Ga0075474_10002497	1	80.56	97.2973	29	3.44828
DvSAG_27_A8	Ga0075476_10001469	1	82.1	99.2278	29	3.44828
DvSAG_27_A8	Ga0075476_10006271	2	93.58	96.875	29	6.89655
DvSAG_27_A8	Ga0075477_10007251	2	81.515	97.2462	29	6.89655
DvSAG_27_A8	Ga0075478_10000781	1	82.64	100	29	3.44828
DvSAG_27_A8	Ga0075478_10002793	4	87.3725	99.6894	29	13.7931
DvSAG_27_A8	Ga0081602_1004262	1	81.36	92.1875	29	3.44828
DvSAG_27_A8	Ga0098033_1000202	1	92.78	97.9798	29	3.44828
DvSAG_27_A8	Ga0098033_1000344	1	82.08	98.8571	29	3.44828
DvSAG_27_A8	Ga0098033_1000410	1	92.39	98.9247	29	3.44828
DvSAG_27_A8	Ga0098033_1000657	2	80.765	98.4375	29	6.89655
DvSAG_27_A8	Ga0098033_1000818	1	82.76	100	29	3.44828
DvSAG_27_A8	Ga0098033_1001165	3	96.5033	100	29	10.3448
DvSAG_27_A8	Ga0098033_1001297	1	89.17	100	29	3.44828
DvSAG_27_A8	Ga0098033_1001382	1	82.26	96.875	29	3.44828
DvSAG_27_A8	Ga0098033_1001458	5	88.732	98.6596	29	17.2414
DvSAG_27_A8	Ga0098033_1001521	1	80.85	100	29	3.44828
DvSAG_27_A8	Ga0098033_1001779	1	82.26	91.1765	29	3.44828
DvSAG_27_A8	Ga0098033_1002115	1	81.25	98.4615	29	3.44828
DvSAG_27_A8	Ga0098033_1002137	1	81.6	98.4252	29	3.44828
DvSAG_27_A8	Ga0098033_1002505	2	81.87	99.1936	29	6.89655
DvSAG_27_A8	Ga0098033_1003113	1	81.62	99.6337	29	3.44828
DvSAG_27_A8	Ga0098034_1000460	1	93.33	97.8261	29	3.44828
DvSAG_27_A8	Ga0098034_1000597	1	83.61	98.3871	29	3.44828
DvSAG_27_A8	Ga0098034_1000717	3	88.5867	100.401	29	10.3448
DvSAG_27_A8	Ga0098034_1000804	1	89.29	100	29	3.44828
DvSAG_27_A8	Ga0098034_1000857	1	82.46	98.8439	29	3.44828
DvSAG_27_A8	Ga0098034_1001220	1	80.92	100.184	29	3.44828
DvSAG_27_A8	Ga0098034_1001989	2	86.965	100	29	6.89655
DvSAG_27_A8	Ga0098034_1002655	1	84.15	100	29	3.44828
DvSAG_27_A8	Ga0098034_1002850	1	93.33	97.8261	29	3.44828
DvSAG_27_A8	Ga0098034_1003119	1	90.48	100	29	3.44828
DvSAG_27_A8	Ga0098034_1003824	2	86.67	98.9209	29	6.89655
DvSAG_27_A8	Ga0098035_1000137	1	80.87	100	29	3.44828
DvSAG_27_A8	Ga0098035_1000180	1	81.93	98.8095	29	3.44828
DvSAG_27_A8	Ga0098035_1000537	1	83.61	98.3871	29	3.44828
DvSAG_27_A8	Ga0098035_1000679	4	84.0575	95.7455	29	13.7931
DvSAG_27_A8	Ga0098035_1000693	1	85.19	100	29	3.44828
DvSAG_27_A8	Ga0098035_1000744	2	97.98	100	29	6.89655
DvSAG_27_A8	Ga0098035_1000752	1	95	98.3607	29	3.44828
DvSAG_27_A8	Ga0098035_1000857	1	95.51	100	29	3.44828
DvSAG_27_A8	Ga0098035_1000880	2	94.98	100	29	6.89655
DvSAG_27_A8	Ga0098035_1001134	1	81.65	95.614	29	3.44828
DvSAG_27_A8	Ga0098035_1001294	3	93.0067	98.6243	29	10.3448
DvSAG_27_A8	Ga0098035_1001441	2	94.85	100	29	6.89655
DvSAG_27_A8	Ga0098035_1001574	1	92.31	98.913	29	3.44828
DvSAG_27_A8	Ga0098035_1002001	6	87.2267	99.1368	29	20.6897
DvSAG_27_A8	Ga0098035_1002409	1	84.38	103.226	29	3.44828
DvSAG_27_A8	Ga0098035_1002740	1	86.59	96.4706	29	3.44828
DvSAG_27_A8	Ga0098035_1002913	5	89.104	98.8075	29	17.2414
DvSAG_27_A8	Ga0098035_1003086	1	83.46	96.9466	29	3.44828
DvSAG_27_A8	Ga0098035_1003098	1	92.68	100	29	3.44828
DvSAG_27_A8	Ga0098035_1003441	3	84.5533	98.7556	29	10.3448
DvSAG_27_A8	Ga0098035_1003574	1	82.95	100	29	3.44828
DvSAG_27_A8	Ga0098035_1003798	1	82.91	99.1525	29	3.44828
DvSAG_27_A8	Ga0098035_1003807	2	88.95	98.5897	29	6.89655
DvSAG_27_A8	Ga0098035_1003865	1	82.17	100	29	3.44828
DvSAG_27_A8	Ga0098035_1004119	3	88.0167	99.4624	29	10.3448
DvSAG_27_A8	Ga0098035_1004742	2	86.595	98.6842	29	6.89655
DvSAG_27_A8	Ga0098035_1006382	1	84.13	101.961	29	3.44828
DvSAG_27_A8	Ga0098036_1001511	1	85.45	100	29	3.44828
DvSAG_27_A8	Ga0098038_1000001	1	81.91	100	29	3.44828
DvSAG_27_A8	Ga0098038_1001866	1	83.9	100.855	29	3.44828
DvSAG_27_A8	Ga0098039_1000098	1	86	97.6562	29	3.44828
DvSAG_27_A8	Ga0098039_1000328	1	84.51	100	29	3.44828
DvSAG_27_A8	Ga0098039_1000419	1	91.96	93.3333	29	3.44828
DvSAG_27_A8	Ga0098039_1000448	1	80.52	97.479	29	3.44828
DvSAG_27_A8	Ga0098039_1000744	2	86.965	100	29	6.89655
DvSAG_27_A8	Ga0098039_1000772	2	96.305	100	29	6.89655
DvSAG_27_A8	Ga0098039_1000805	1	95.76	100	29	3.44828
DvSAG_27_A8	Ga0098039_1000952	1	86.96	96.8421	29	3.44828
DvSAG_27_A8	Ga0098039_1001340	1	82.14	90.3226	29	3.44828
DvSAG_27_A8	Ga0098039_1001343	1	80.92	100.184	29	3.44828
DvSAG_27_A8	Ga0098039_1001774	1	87.5	100	29	3.44828
DvSAG_27_A8	Ga0098039_1001781	3	83.6233	98.3754	29	10.3448
DvSAG_27_A8	Ga0098039_1002174	1	89.01	95.7895	29	3.44828
DvSAG_27_A8	Ga0098039_1002485	1	83.61	98.3871	29	3.44828
DvSAG_27_A8	Ga0098039_1002589	1	82.95	100	29	3.44828
DvSAG_27_A8	Ga0098039_1002599	1	91.91	100	29	3.44828
DvSAG_27_A8	Ga0098039_1004475	2	84.14	100	29	6.89655
DvSAG_27_A8	Ga0098040_1000071	1	85.11	96.9072	29	3.44828
DvSAG_27_A8	Ga0098040_1000337	5	89.404	99.2648	29	17.2414
DvSAG_27_A8	Ga0098040_1000353	3	85.15	99.1228	29	10.3448
DvSAG_27_A8	Ga0098040_1000471	1	82.86	97.2222	29	3.44828
DvSAG_27_A8	Ga0098040_1000756	2	92.055	97.5806	29	6.89655
DvSAG_27_A8	Ga0098040_1000878	2	86.29	98.9801	29	6.89655
DvSAG_27_A8	Ga0098040_1000959	1	81.65	95.614	29	3.44828
DvSAG_27_A8	Ga0098040_1001104	1	83.61	98.3871	29	3.44828
DvSAG_27_A8	Ga0098040_1001294	4	89.515	99.1815	29	13.7931
DvSAG_27_A8	Ga0098040_1002099	1	82.38	100.521	29	3.44828
DvSAG_27_A8	Ga0098040_1002311	1	88.54	100	29	3.44828
DvSAG_27_A8	Ga0098040_1002351	3	86.5833	99.4624	29	10.3448
DvSAG_27_A8	Ga0098042_1001102	1	83.21	100	29	3.44828
DvSAG_27_A8	Ga0098043_1000972	1	83.21	100	29	3.44828
DvSAG_27_A8	Ga0098043_1002506	1	80.92	98.0645	29	3.44828
DvSAG_27_A8	Ga0098044_1000361	5	90.844	99.6774	29	17.2414
DvSAG_27_A8	Ga0098044_1000549	3	86.04	99.3122	29	10.3448
DvSAG_27_A8	Ga0098044_1000605	1	82.86	100	29	3.44828
DvSAG_27_A8	Ga0098044_1000922	1	95.35	100	29	3.44828
DvSAG_27_A8	Ga0098044_1000936	4	93.3575	100.066	29	13.7931
DvSAG_27_A8	Ga0098044_1000969	1	94.19	100	29	3.44828
DvSAG_27_A8	Ga0098044_1001026	1	82.17	100	29	3.44828
DvSAG_27_A8	Ga0098044_1001122	2	86.29	98.9801	29	6.89655
DvSAG_27_A8	Ga0098044_1001159	2	93.61	100.568	29	6.89655
DvSAG_27_A8	Ga0098044_1001470	1	87.08	101.136	29	3.44828
DvSAG_27_A8	Ga0098044_1001486	1	96.61	95.1613	29	3.44828
DvSAG_27_A8	Ga0098044_1001576	1	86.84	100	29	3.44828
DvSAG_27_A8	Ga0098044_1002181	4	87.255	98.9861	29	13.7931
DvSAG_27_A8	Ga0098044_1002316	1	83.61	98.3871	29	3.44828
DvSAG_27_A8	Ga0098044_1003183	6	88.415	99.1081	29	20.6897
DvSAG_27_A8	Ga0098044_1003492	1	92.17	99.1379	29	3.44828
DvSAG_27_A8	Ga0098044_1003928	1	82.65	98.4925	29	3.44828
DvSAG_27_A8	Ga0098044_1004090	3	86.1733	99.4624	29	10.3448
DvSAG_27_A8	Ga0098044_1004342	1	80.77	97.5	29	3.44828
DvSAG_27_A8	Ga0098044_1004390	1	89.57	100	29	3.44828
DvSAG_27_A8	Ga0098044_1004777	2	86.59	98.6842	29	6.89655
DvSAG_27_A8	Ga0098044_1004902	2	88.95	98.5897	29	6.89655
DvSAG_27_A8	Ga0098044_1005012	1	80.82	93.5897	29	3.44828
DvSAG_27_A8	Ga0098044_1005082	1	85.25	98.3871	29	3.44828
DvSAG_27_A8	Ga0098044_1005316	1	80	100	29	3.44828
DvSAG_27_A8	Ga0098044_1005768	1	83.65	92.8571	29	3.44828
DvSAG_27_A8	Ga0098044_1005901	1	80.08	100.417	29	3.44828
DvSAG_27_A8	Ga0098044_1006022	1	95	98.3607	29	3.44828
DvSAG_27_A8	Ga0098044_1007331	5	90.804	99.1019	29	17.2414
DvSAG_27_A8	Ga0098044_1007995	1	81.67	98.3607	29	3.44828
DvSAG_27_A8	Ga0098046_1000645	1	83.33	96.7742	29	3.44828
DvSAG_27_A8	Ga0098047_10000054	1	80	100	29	3.44828
DvSAG_27_A8	Ga0098047_10000228	1	82.87	100	29	3.44828
DvSAG_27_A8	Ga0098047_10000234	1	88.14	96.7213	29	3.44828
DvSAG_27_A8	Ga0098047_10000375	1	86.67	97.8261	29	3.44828
DvSAG_27_A8	Ga0098047_10000404	2	92.835	99.4382	29	6.89655
DvSAG_27_A8	Ga0098047_10000438	3	90.9	100.274	29	10.3448
DvSAG_27_A8	Ga0098047_10000467	1	89.04	100	29	3.44828
DvSAG_27_A8	Ga0098047_10000548	1	81.65	95.614	29	3.44828
DvSAG_27_A8	Ga0098047_10000689	1	86.96	96.8421	29	3.44828
DvSAG_27_A8	Ga0098047_10000694	1	86.05	100	29	3.44828
DvSAG_27_A8	Ga0098047_10000799	1	89.01	95.7895	29	3.44828
DvSAG_27_A8	Ga0098047_10000833	2	80.49	99.1936	29	6.89655
DvSAG_27_A8	Ga0098047_10000949	1	84.62	100	29	3.44828
DvSAG_27_A8	Ga0098047_10001087	2	94.49	98.8637	29	6.89655
DvSAG_27_A8	Ga0098047_10001097	1	93.02	100	29	3.44828
DvSAG_27_A8	Ga0098047_10001458	1	80.92	100.184	29	3.44828
DvSAG_27_A8	Ga0098047_10002222	1	89.77	100	29	3.44828
DvSAG_27_A8	Ga0098047_10002619	1	83.61	98.3871	29	3.44828
DvSAG_27_A8	Ga0098047_10003215	1	87.73	92.0904	29	3.44828
DvSAG_27_A8	Ga0098047_10003232	1	91.53	100	29	3.44828
DvSAG_27_A8	Ga0098047_10003728	1	92.11	98.7013	29	3.44828
DvSAG_27_A8	Ga0098047_10003762	1	82.95	100	29	3.44828
DvSAG_27_A8	Ga0098047_10005336	1	81.08	90.2439	29	3.44828
DvSAG_27_A8	Ga0098051_1002222	1	85.71	96.5517	29	3.44828
DvSAG_27_A8	Ga0098051_1002356	1	80	90.1639	29	3.44828
DvSAG_27_A8	Ga0098051_1003087	1	95	98.3607	29	3.44828
DvSAG_27_A8	Ga0098051_1003602	4	87.99	97.9227	29	13.7931
DvSAG_27_A8	Ga0098052_1000202	1	83.19	99.1667	29	3.44828
DvSAG_27_A8	Ga0098052_1000351	2	86.16	98.9854	29	6.89655
DvSAG_27_A8	Ga0098052_1000381	1	87.98	99.4565	29	3.44828
DvSAG_27_A8	Ga0098052_1000617	1	81.96	99.2218	29	3.44828
DvSAG_27_A8	Ga0098052_1000987	4	88.235	99.2366	29	13.7931
DvSAG_27_A8	Ga0098052_1001223	3	93.39	100.087	29	10.3448
DvSAG_27_A8	Ga0098052_1001528	4	87.9275	99.116	29	13.7931
DvSAG_27_A8	Ga0098052_1001632	1	84.82	96.5517	29	3.44828
DvSAG_27_A8	Ga0098052_1001685	4	89.8225	99.116	29	13.7931
DvSAG_27_A8	Ga0098052_1002717	1	87.72	100	29	3.44828
DvSAG_27_A8	Ga0098052_1003067	4	87.44	98.7138	29	13.7931
DvSAG_27_A8	Ga0098052_1003124	1	95.12	100	29	3.44828
DvSAG_27_A8	Ga0098052_1003567	1	82.61	100	29	3.44828
DvSAG_27_A8	Ga0098052_1003831	2	80.165	99.1936	29	6.89655
DvSAG_27_A8	Ga0098052_1003952	1	87.18	98.7342	29	3.44828
DvSAG_27_A8	Ga0098052_1005588	3	85.9667	97.0424	29	10.3448
DvSAG_27_A8	Ga0098052_1005609	1	88.41	98.5714	29	3.44828
DvSAG_27_A8	Ga0098052_1005617	1	81.6	99.3902	29	3.44828
DvSAG_27_A8	Ga0098052_1005918	2	88.95	98.5897	29	6.89655
DvSAG_27_A8	Ga0098052_1006500	1	84.09	100	29	3.44828
DvSAG_27_A8	Ga0098052_1006937	4	89.3075	99.2763	29	13.7931
DvSAG_27_A8	Ga0098052_1007196	1	80.46	98.8636	29	3.44828
DvSAG_27_A8	Ga0098052_1007576	2	96.07	100.282	29	6.89655
DvSAG_27_A8	Ga0098052_1007872	1	80.87	98.2906	29	3.44828
DvSAG_27_A8	Ga0098052_1008682	1	90.24	97.619	29	3.44828
DvSAG_27_A8	Ga0098052_1008860	1	87.2	97.0414	29	3.44828
DvSAG_27_A8	Ga0098053_1000061	2	96.61	100	29	6.89655
DvSAG_27_A8	Ga0098053_1000065	1	81.36	95.1613	29	3.44828
DvSAG_27_A8	Ga0098053_1000167	1	84.47	97.1698	29	3.44828
DvSAG_27_A8	Ga0098053_1000190	5	90.842	99.6774	29	17.2414
DvSAG_27_A8	Ga0098053_1000239	1	87.88	100	29	3.44828
DvSAG_27_A8	Ga0098053_1000341	1	80.33	99.8182	29	3.44828
DvSAG_27_A8	Ga0098053_1000485	1	88.41	98.5714	29	3.44828
DvSAG_27_A8	Ga0098053_1000590	3	89.28	99.4832	29	10.3448
DvSAG_27_A8	Ga0098053_1000627	1	90.21	100	29	3.44828
DvSAG_27_A8	Ga0098053_1000663	4	87.255	98.9861	29	13.7931
DvSAG_27_A8	Ga0098053_1000818	1	84.38	100	29	3.44828
DvSAG_27_A8	Ga0098053_1000955	1	80.49	100	29	3.44828
DvSAG_27_A8	Ga0098053_1001461	3	84.61	98.0083	29	10.3448
DvSAG_27_A8	Ga0098053_1001556	2	88.95	98.5897	29	6.89655
DvSAG_27_A8	Ga0098053_1002383	1	80.87	98.2906	29	3.44828
DvSAG_27_A8	Ga0098053_1002469	1	84.97	99.7118	29	3.44828
DvSAG_27_A8	Ga0098054_1000242	1	90.48	98.4375	29	3.44828
DvSAG_27_A8	Ga0098054_1000571	5	90.846	99.6774	29	17.2414
DvSAG_27_A8	Ga0098054_1000764	2	97.265	100	29	6.89655
DvSAG_27_A8	Ga0098054_1000875	2	88.945	100.143	29	6.89655
DvSAG_27_A8	Ga0098054_1001021	5	87.878	99.2367	29	17.2414
DvSAG_27_A8	Ga0098054_1001227	1	81.82	94.2857	29	3.44828
DvSAG_27_A8	Ga0098054_1001353	1	83.9	101.724	29	3.44828
DvSAG_27_A8	Ga0098054_1001395	1	87.08	101.136	29	3.44828
DvSAG_27_A8	Ga0098054_1001432	3	89.28	99.4832	29	10.3448
DvSAG_27_A8	Ga0098054_1001494	4	93.3575	100.066	29	13.7931
DvSAG_27_A8	Ga0098054_1001869	2	83.95	98.8281	29	6.89655
DvSAG_27_A8	Ga0098054_1002908	1	86.96	96.8421	29	3.44828
DvSAG_27_A8	Ga0098054_1003817	2	88.95	98.5897	29	6.89655
DvSAG_27_A8	Ga0098054_1004181	1	81.18	97.7011	29	3.44828
DvSAG_27_A8	Ga0098054_1004503	1	80	90.1639	29	3.44828
DvSAG_27_A8	Ga0098054_1006539	1	83.33	90	29	3.44828
DvSAG_27_A8	Ga0098055_1003127	4	88.0075	97.9227	29	13.7931
DvSAG_27_A8	Ga0098055_1003161	1	80.47	98.2558	29	3.44828
DvSAG_27_A8	Ga0098055_1003472	1	84.82	100.526	29	3.44828
DvSAG_27_A8	Ga0098055_1005424	1	80.68	99.7992	29	3.44828
DvSAG_27_A8	Ga0098055_1007101	4	89.05	99.1009	29	13.7931
DvSAG_27_A8	Ga0098056_1000269	3	87.6267	99.9038	29	10.3448
DvSAG_27_A8	Ga0098056_1000474	1	83.78	100	29	3.44828
DvSAG_27_A8	Ga0098056_1001690	5	87.936	99.1149	29	17.2414
DvSAG_27_A8	Ga0098056_1002562	5	89.228	99.3673	29	17.2414
DvSAG_27_A8	Ga0098057_1000283	1	92.47	98.9362	29	3.44828
DvSAG_27_A8	Ga0098057_1000599	1	82.55	99.3333	29	3.44828
DvSAG_27_A8	Ga0098057_1000662	1	94.44	99.0826	29	3.44828
DvSAG_27_A8	Ga0098057_1000971	2	95.37	100	29	6.89655
DvSAG_27_A8	Ga0098057_1001003	1	88.64	100	29	3.44828
DvSAG_27_A8	Ga0098057_1001048	2	84.68	100	29	6.89655
DvSAG_27_A8	Ga0098057_1001245	1	81.6	97.6562	29	3.44828
DvSAG_27_A8	Ga0098058_1000366	1	81.67	98.3607	29	3.44828
DvSAG_27_A8	Ga0098058_1000510	1	86.33	98.5816	29	3.44828
DvSAG_27_A8	Ga0098058_1000696	3	87.4233	97.9894	29	10.3448
DvSAG_27_A8	Ga0098058_1001523	1	90	100	29	3.44828
DvSAG_27_A8	Ga0098058_1001533	2	91.605	100.257	29	6.89655
DvSAG_27_A8	Ga0098059_1000661	2	94.585	100	29	6.89655
DvSAG_27_A8	Ga0098059_1001350	3	86.5667	96.8479	29	10.3448
DvSAG_27_A8	Ga0098059_1001526	1	86.96	100	29	3.44828
DvSAG_27_A8	Ga0098059_1005223	1	84.21	100	29	3.44828
DvSAG_27_A8	Ga0098060_1000579	1	81.54	97.0149	29	3.44828
DvSAG_27_A8	Ga0098060_1000748	1	86.32	100	29	3.44828
DvSAG_27_A8	Ga0098060_1000959	1	93.91	100	29	3.44828
DvSAG_27_A8	Ga0098060_1001717	1	80.15	99.2424	29	3.44828
DvSAG_27_A8	Ga0098060_1001902	3	94.97	100	29	10.3448
DvSAG_27_A8	Ga0098060_1002898	4	88.25	97.6359	29	13.7931
DvSAG_27_A8	Ga0098060_1003104	1	85.45	98.2143	29	3.44828
DvSAG_27_A8	Ga0098061_1000002	1	96.61	95.1613	29	3.44828
DvSAG_27_A8	Ga0098061_1000147	2	97.305	100	29	6.89655
DvSAG_27_A8	Ga0098061_1000276	1	95.35	100	29	3.44828
DvSAG_27_A8	Ga0098061_1000287	2	86.16	98.9854	29	6.89655
DvSAG_27_A8	Ga0098061_1000319	4	91.9175	100.066	29	13.7931
DvSAG_27_A8	Ga0098061_1000325	1	80.43	97.8723	29	3.44828
DvSAG_27_A8	Ga0098061_1000393	6	90.14	99.2223	29	20.6897
DvSAG_27_A8	Ga0098061_1000474	3	91.53	96.6667	29	10.3448
DvSAG_27_A8	Ga0098061_1000537	1	89	99.0099	29	3.44828
DvSAG_27_A8	Ga0098061_1000616	5	89.602	99.1019	29	17.2414
DvSAG_27_A8	Ga0098061_1000780	2	92.055	99.4382	29	6.89655
DvSAG_27_A8	Ga0098061_1000800	1	81.03	90.625	29	3.44828
DvSAG_27_A8	Ga0098061_1000870	1	94.19	100	29	3.44828
DvSAG_27_A8	Ga0098061_1000914	2	84.18	99.0695	29	6.89655
DvSAG_27_A8	Ga0098061_1000966	1	85.42	100	29	3.44828
DvSAG_27_A8	Ga0098061_1000985	1	95.12	100	29	3.44828
DvSAG_27_A8	Ga0098061_1001041	1	85.2	100	29	3.44828
DvSAG_27_A8	Ga0098061_1001501	1	96.61	95.1613	29	3.44828
DvSAG_27_A8	Ga0098061_1001502	5	89.574	99.2648	29	17.2414
DvSAG_27_A8	Ga0098061_1001663	1	85.96	100	29	3.44828
DvSAG_27_A8	Ga0098061_1001810	1	80.21	100	29	3.44828
DvSAG_27_A8	Ga0098061_1002046	5	86.188	97.9958	29	17.2414
DvSAG_27_A8	Ga0098061_1003676	3	86.1633	99.4624	29	10.3448
DvSAG_27_A8	Ga0098061_1004078	1	82.17	100	29	3.44828
DvSAG_27_A8	Ga0098061_1004348	2	88.95	98.5897	29	6.89655
DvSAG_27_A8	Ga0098061_1004718	1	87.88	100	29	3.44828
DvSAG_27_A8	Ga0098061_1004969	2	87.32	97.7272	29	6.89655
DvSAG_27_A8	Ga0098061_1005345	1	81.6	98.4252	29	3.44828
DvSAG_27_A8	Ga0098061_1007119	4	91.1575	98.9857	29	13.7931
DvSAG_27_A8	Ga0098074_1000759	1	84.62	100	29	3.44828
DvSAG_27_A8	Ga0099846_1000082	1	82.61	97.8723	29	3.44828
DvSAG_27_A8	Ga0099846_1000768	1	87.93	92.0635	29	3.44828
DvSAG_27_A8	Ga0099846_1001815	1	80	100	29	3.44828
DvSAG_27_A8	Ga0099848_1000643	1	87.98	96.3158	29	3.44828
DvSAG_27_A8	Ga0099848_1001308	1	87.93	92.0635	29	3.44828
DvSAG_27_A8	Ga0099849_1000617	1	88.46	100	29	3.44828
DvSAG_27_A8	Ga0099849_1001393	1	80.47	93.8889	29	3.44828
DvSAG_27_A8	Ga0099849_1001819	1	81.25	100	29	3.44828
DvSAG_27_A8	Ga0099850_1000545	1	86.79	94.6429	29	3.44828
DvSAG_27_A8	Ga0099850_1000737	2	87.935	100	29	6.89655
DvSAG_27_A8	Ga0099850_1001623	1	85.25	99.187	29	3.44828
DvSAG_27_A8	Ga0099850_1004391	3	86.8267	98.6616	29	10.3448
DvSAG_27_A8	Ga0099851_1000964	2	87.21	100	29	6.89655
DvSAG_27_A8	Ga0099851_1002035	1	87.93	92.0635	29	3.44828
DvSAG_27_A8	Ga0102963_1001199	1	84.78	95.8333	29	3.44828
DvSAG_27_A8	Ga0104988_10734	1	84.03	99.5816	29	3.44828
DvSAG_27_A8	Ga0104999_1006420	1	88.73	100	29	3.44828
DvSAG_27_A8	Ga0104999_1012388	2	85.415	98.9209	29	6.89655
DvSAG_27_A8	Ga0105000_1003175	1	84.44	100	29	3.44828
DvSAG_27_A8	Ga0105000_1003570	4	87.295	97.8752	29	13.7931
DvSAG_27_A8	Ga0105000_1003644	2	90.1	100	29	6.89655
DvSAG_27_A8	Ga0105000_1005140	5	90.402	99.0977	29	17.2414
DvSAG_27_A8	Ga0105000_1006498	4	89.93	98.9637	29	13.7931
DvSAG_27_A8	Ga0105000_1007773	1	83.22	99.6479	29	3.44828
DvSAG_27_A8	Ga0105000_1009506	3	97.5667	100	29	10.3448
DvSAG_27_A8	Ga0105000_1010185	4	89.935	98.3638	29	13.7931
DvSAG_27_A8	Ga0105000_1012699	3	95.7967	100	29	10.3448
DvSAG_27_A8	Ga0105000_1020829	1	83.87	100	29	3.44828
DvSAG_27_A8	Ga0105000_1022655	1	91.4	100	29	3.44828
DvSAG_27_A8	Ga0105000_1025824	2	86.28	98.9209	29	6.89655
DvSAG_27_A8	Ga0105000_1026917	3	86.0667	98.3871	29	10.3448
DvSAG_27_A8	Ga0105000_1030408	1	81	99.0099	29	3.44828
DvSAG_27_A8	Ga0105010_1005511	1	80.8	98.4252	29	3.44828
DvSAG_27_A8	Ga0105010_1009636	3	86.0667	98.3871	29	10.3448
DvSAG_27_A8	Ga0105012_1001927	4	84.845	98.3966	29	13.7931
DvSAG_27_A8	Ga0105013_1005768	1	80.45	98.2143	29	3.44828
DvSAG_27_A8	Ga0105013_1025014	2	81.585	96.7736	29	6.89655
DvSAG_27_A8	Ga0105015_1000790	3	93.8533	100	29	10.3448
DvSAG_27_A8	Ga0105015_1002467	2	96.15	100	29	6.89655
DvSAG_27_A8	Ga0105015_1009177	2	86.28	98.9209	29	6.89655
DvSAG_27_A8	Ga0105015_1009603	3	86.0667	98.3871	29	10.3448
DvSAG_27_A8	Ga0105015_1010954	1	81	99.0099	29	3.44828
DvSAG_27_A8	Ga0105015_1011675	1	89.07	98.3871	29	3.44828
DvSAG_27_A8	Ga0105016_1001707	1	91.96	100	29	3.44828
DvSAG_27_A8	Ga0105016_1003798	4	89.93	98.9637	29	13.7931
DvSAG_27_A8	Ga0105016_1005162	4	89.935	98.3638	29	13.7931
DvSAG_27_A8	Ga0105016_1006289	5	90.144	100.395	29	17.2414
DvSAG_27_A8	Ga0105016_1006404	2	96.475	100	29	6.89655
DvSAG_27_A8	Ga0105016_1009886	1	82.95	100	29	3.44828
DvSAG_27_A8	Ga0105016_1010960	7	89.7729	99.4613	29	24.1379
DvSAG_27_A8	Ga0105016_1014232	1	89.6	100	29	3.44828
DvSAG_27_A8	Ga0105016_1017663	1	80	98.3607	29	3.44828
DvSAG_27_A8	Ga0105016_1017940	2	86.28	98.9209	29	6.89655
DvSAG_27_A8	Ga0105016_1018835	3	86.0667	98.3871	29	10.3448
DvSAG_27_A8	Ga0105016_1021643	1	81	99.0099	29	3.44828
DvSAG_27_A8	Ga0105016_1021725	1	86.25	100	29	3.44828
DvSAG_27_A8	Ga0105018_1000862	2	93.3	100	29	6.89655
DvSAG_27_A8	Ga0105018_1001092	7	92.6771	99.4078	29	24.1379
DvSAG_27_A8	Ga0105018_1002728	1	89.13	96.3351	29	3.44828
DvSAG_27_A8	Ga0105018_1005356	1	80	98.3607	29	3.44828
DvSAG_27_A8	Ga0105018_1005565	2	86.28	98.9209	29	6.89655
DvSAG_27_A8	Ga0105018_1005886	3	86.0667	98.3871	29	10.3448
DvSAG_27_A8	Ga0105018_1006990	1	81	99.0099	29	3.44828
DvSAG_27_A8	Ga0105019_1001412	1	91.96	100	29	3.44828
DvSAG_27_A8	Ga0105019_1002807	4	89.93	98.9637	29	13.7931
DvSAG_27_A8	Ga0105019_1003171	1	84.44	100	29	3.44828
DvSAG_27_A8	Ga0105019_1003839	4	89.935	98.3638	29	13.7931
DvSAG_27_A8	Ga0105019_1004174	2	96.475	100	29	6.89655
DvSAG_27_A8	Ga0105019_1007321	1	89.39	100	29	3.44828
DvSAG_27_A8	Ga0105019_1010247	1	80	98.3607	29	3.44828
DvSAG_27_A8	Ga0105019_1010481	1	84.07	97.4138	29	3.44828
DvSAG_27_A8	Ga0105019_1011721	1	80.82	93.5897	29	3.44828
DvSAG_27_A8	Ga0105019_1011773	2	86.28	98.9209	29	6.89655
DvSAG_27_A8	Ga0105019_1012387	3	86.0667	98.3871	29	10.3448
DvSAG_27_A8	Ga0105019_1014300	1	81	99.0099	29	3.44828
DvSAG_27_A8	Ga0105023_1007439	3	85.9533	98.3871	29	10.3448
DvSAG_27_A8	Ga0114336_1000470	1	82.12	100	29	3.44828
DvSAG_27_A8	Ga0114336_1012996	1	93.33	100	29	3.44828
DvSAG_27_A8	Ga0114340_1002879	1	81.48	100	29	3.44828
DvSAG_27_A8	Ga0114346_1016165	1	82.86	100	29	3.44828
DvSAG_27_A8	Ga0114363_1001064	1	80	100	29	3.44828
DvSAG_27_A8	Ga0114364_1000781	1	81.04	92.9515	29	3.44828
DvSAG_27_A8	Ga0114364_1001879	1	83.33	100	29	3.44828
DvSAG_27_A8	Ga0114364_1002903	1	88.33	100	29	3.44828
DvSAG_27_A8	Ga0114865_1000846	1	81.04	92.9515	29	3.44828
DvSAG_27_A8	Ga0114865_1002082	1	83.33	100	29	3.44828
DvSAG_27_A8	Ga0114866_101832	1	81.04	92.9515	29	3.44828
DvSAG_27_A8	Ga0114866_108137	1	83.33	100	29	3.44828
DvSAG_27_A8	Ga0114898_1000111	2	81.51	99.1936	29	6.89655
DvSAG_27_A8	Ga0114899_1002149	1	81.88	100.242	29	3.44828
DvSAG_27_A8	Ga0114899_1003142	1	80.79	99.3939	29	3.44828
DvSAG_27_A8	Ga0114902_1000436	1	80.24	94.8864	29	3.44828
DvSAG_27_A8	Ga0114902_1000453	1	83.33	100	29	3.44828
DvSAG_27_A8	Ga0114902_1002641	5	84.858	98.3532	29	17.2414
DvSAG_27_A8	Ga0114902_1004458	2	91.025	97.532	29	6.89655
DvSAG_27_A8	Ga0114904_1000515	1	82.86	100	29	3.44828
DvSAG_27_A8	Ga0114905_1000246	2	85.12	96.6235	29	6.89655
DvSAG_27_A8	Ga0114905_1001472	2	86.055	100	29	6.89655
DvSAG_27_A8	Ga0114905_1001485	1	83.33	100	29	3.44828
DvSAG_27_A8	Ga0114905_1003585	1	80	98.3607	29	3.44828
DvSAG_27_A8	Ga0114905_1003999	2	88.17	97.5806	29	6.89655
DvSAG_27_A8	Ga0114905_1004440	1	80.84	100.263	29	3.44828
DvSAG_27_A8	Ga0114906_1000050	1	94.92	95.1613	29	3.44828
DvSAG_27_A8	Ga0114906_1000117	7	88.76	98.8838	29	24.1379
DvSAG_27_A8	Ga0114906_1000679	2	92.68	99.7126	29	6.89655
DvSAG_27_A8	Ga0114906_1000681	3	84.1467	99.4624	29	10.3448
DvSAG_27_A8	Ga0114906_1001128	1	93.06	98.6301	29	3.44828
DvSAG_27_A8	Ga0114906_1001450	3	81.92	98.0963	29	10.3448
DvSAG_27_A8	Ga0114906_1001545	4	86.0275	98.8187	29	13.7931
DvSAG_27_A8	Ga0114906_1003581	1	90.57	97.2477	29	3.44828
DvSAG_27_A8	Ga0114906_1004226	1	84.44	97.8261	29	3.44828
DvSAG_27_A8	Ga0114906_1004590	1	82.4	100	29	3.44828
DvSAG_27_A8	Ga0114906_1005104	1	80.07	100	29	3.44828
DvSAG_27_A8	Ga0114906_1005535	1	87.56	94.6078	29	3.44828
DvSAG_27_A8	Ga0114908_1000455	2	85.12	96.6235	29	6.89655
DvSAG_27_A8	Ga0114908_1001022	1	83.67	100	29	3.44828
DvSAG_27_A8	Ga0114908_1001387	1	80.18	99.0868	29	3.44828
DvSAG_27_A8	Ga0114908_1001527	1	87.61	97.4138	29	3.44828
DvSAG_27_A8	Ga0114908_1002104	2	82.33	99.1936	29	6.89655
DvSAG_27_A8	Ga0114908_1002404	1	91.09	96.1905	29	3.44828
DvSAG_27_A8	Ga0114908_1003002	1	87.5	100	29	3.44828
DvSAG_27_A8	Ga0114908_1004070	1	87.9	100	29	3.44828
DvSAG_27_A8	Ga0114908_1004498	1	89.66	100	29	3.44828
DvSAG_27_A8	Ga0114908_1004920	2	82.57	97.184	29	6.89655
DvSAG_27_A8	Ga0114908_1006192	1	83.09	100.485	29	3.44828
DvSAG_27_A8	Ga0114908_1006519	2	92.68	99.7126	29	6.89655
DvSAG_27_A8	Ga0114909_1000484	2	85.12	96.6235	29	6.89655
DvSAG_27_A8	Ga0114910_1004401	1	90	98.3607	29	3.44828
DvSAG_27_A8	Ga0114911_1002216	1	85.24	99.5261	29	3.44828
DvSAG_27_A8	Ga0114912_1000256	2	85.12	96.6235	29	6.89655
DvSAG_27_A8	Ga0114912_1001737	2	81.51	99.1936	29	6.89655
DvSAG_27_A8	Ga0114912_1002593	1	86.46	97.8632	29	3.44828
DvSAG_27_A8	Ga0114918_10001077	1	88.66	95.098	29	3.44828
DvSAG_27_A8	Ga0114968_10004389	1	84.48	90.625	29	3.44828
DvSAG_27_A8	Ga0114973_10007193	1	84.48	90.625	29	3.44828
DvSAG_27_A8	Ga0114976_10001020	1	84.48	90.625	29	3.44828
DvSAG_27_A8	Ga0114993_10011990	1	87.5	100	29	3.44828
DvSAG_27_A8	Ga0115000_10001657	1	81.92	100	29	3.44828
DvSAG_27_A8	Ga0115011_10002893	1	84.62	100	29	3.44828
DvSAG_27_A8	Ga0115371_10475639	1	81.58	100	29	3.44828
DvSAG_27_A8	Ga0115545_1002755	1	85.25	100.286	29	3.44828
DvSAG_27_A8	Ga0115545_1006250	1	87.02	98.4962	29	3.44828
DvSAG_27_A8	Ga0115546_1001169	2	88.255	99.7126	29	6.89655
DvSAG_27_A8	Ga0115546_1002927	1	82.98	97.9167	29	3.44828
DvSAG_27_A8	Ga0115546_1005610	1	84.38	98.9691	29	3.44828
DvSAG_27_A8	Ga0115548_1004069	1	85.06	100.286	29	3.44828
DvSAG_27_A8	Ga0115551_1005337	1	84.61	100.512	29	3.44828
DvSAG_27_A8	Ga0115556_1008992	1	87.27	99.0991	29	3.44828
DvSAG_27_A8	Ga0115566_10001973	4	88.0825	99.9278	29	13.7931
DvSAG_27_A8	Ga0115571_1008557	1	92.06	98.4375	29	3.44828
DvSAG_27_A8	Ga0115649_1006784	2	88.7	100	29	6.89655
DvSAG_27_A8	Ga0115649_1007245	4	87.14	97.9227	29	13.7931
DvSAG_27_A8	Ga0115649_1008940	2	96.15	100	29	6.89655
DvSAG_27_A8	Ga0115649_1011201	4	89.93	98.9637	29	13.7931
DvSAG_27_A8	Ga0115649_1013770	6	90.86	100.329	29	20.6897
DvSAG_27_A8	Ga0115649_1014082	4	89.935	98.3638	29	13.7931
DvSAG_27_A8	Ga0115649_1015299	1	84.44	100	29	3.44828
DvSAG_27_A8	Ga0115649_1016266	5	90.402	99.0977	29	17.2414
DvSAG_27_A8	Ga0115649_1020695	3	95.7967	100	29	10.3448
DvSAG_27_A8	Ga0115649_1029063	1	82.22	104.651	29	3.44828
DvSAG_27_A8	Ga0115649_1040744	2	86.28	98.9209	29	6.89655
DvSAG_27_A8	Ga0115649_1042393	3	86.0667	98.3871	29	10.3448
DvSAG_27_A8	Ga0115649_1047500	1	81	99.0099	29	3.44828
DvSAG_27_A8	Ga0115650_1002743	1	91.96	100	29	3.44828
DvSAG_27_A8	Ga0115650_1003144	1	84.62	100	29	3.44828
DvSAG_27_A8	Ga0115650_1003561	9	88.4644	99.3902	29	31.0345
DvSAG_27_A8	Ga0115650_1005721	1	86.46	100	29	3.44828
DvSAG_27_A8	Ga0115650_1005951	4	89.93	98.9637	29	13.7931
DvSAG_27_A8	Ga0115650_1006119	1	81.82	94.8276	29	3.44828
DvSAG_27_A8	Ga0115650_1007495	4	89.935	98.3638	29	13.7931
DvSAG_27_A8	Ga0115650_1011237	2	96.475	100	29	6.89655
DvSAG_27_A8	Ga0115650_1011479	10	88.84	99.7955	29	34.4828
DvSAG_27_A8	Ga0115650_1012889	1	86.36	100	29	3.44828
DvSAG_27_A8	Ga0115650_1014794	5	90.402	99.0977	29	17.2414
DvSAG_27_A8	Ga0115650_1017083	1	80	98.3607	29	3.44828
DvSAG_27_A8	Ga0115650_1017723	1	91.96	100	29	3.44828
DvSAG_27_A8	Ga0115650_1021698	2	86.03	92.8963	29	6.89655
DvSAG_27_A8	Ga0115650_1022794	2	86.28	98.9209	29	6.89655
DvSAG_27_A8	Ga0115650_1023083	4	90.9675	97.5397	29	13.7931
DvSAG_27_A8	Ga0115650_1023821	3	86.0667	98.3871	29	10.3448
DvSAG_27_A8	Ga0115650_1024952	3	85.6967	95.4027	29	10.3448
DvSAG_27_A8	Ga0115650_1027218	1	81	99.0099	29	3.44828
DvSAG_27_A8	Ga0115651_1001562	5	90.144	100.395	29	17.2414
DvSAG_27_A8	Ga0115651_1001801	1	91.96	100	29	3.44828
DvSAG_27_A8	Ga0115651_1003818	4	89.93	98.9637	29	13.7931
DvSAG_27_A8	Ga0115651_1003857	1	81.03	100.247	29	3.44828
DvSAG_27_A8	Ga0115651_1005108	1	84.44	100	29	3.44828
DvSAG_27_A8	Ga0115651_1006023	1	85.71	95.4545	29	3.44828
DvSAG_27_A8	Ga0115651_1006184	2	96.475	100	29	6.89655
DvSAG_27_A8	Ga0115651_1006288	6	90.165	99.1179	29	20.6897
DvSAG_27_A8	Ga0115651_1007427	1	80.72	93.7853	29	3.44828
DvSAG_27_A8	Ga0115651_1007477	1	84.09	100	29	3.44828
DvSAG_27_A8	Ga0115651_1008019	1	86.46	100	29	3.44828
DvSAG_27_A8	Ga0115651_1008748	4	89.935	98.3638	29	13.7931
DvSAG_27_A8	Ga0115651_1009913	1	80	104.167	29	3.44828
DvSAG_27_A8	Ga0115651_1011582	4	91.415	97.452	29	13.7931
DvSAG_27_A8	Ga0115651_1011872	1	91.96	100	29	3.44828
DvSAG_27_A8	Ga0115651_1013801	1	80	98.3607	29	3.44828
DvSAG_27_A8	Ga0115651_1013912	1	86.49	100	29	3.44828
DvSAG_27_A8	Ga0115651_1016197	2	86.28	98.9209	29	6.89655
DvSAG_27_A8	Ga0115651_1017080	3	86.0667	98.3871	29	10.3448
DvSAG_27_A8	Ga0115651_1017659	4	87.8525	99.0572	29	13.7931
DvSAG_27_A8	Ga0115651_1020233	1	81	99.0099	29	3.44828
DvSAG_27_A8	Ga0115653_1009101	1	88.73	100	29	3.44828
DvSAG_27_A8	Ga0115653_1017846	2	85.415	98.9209	29	6.89655
DvSAG_27_A8	Ga0115656_1003876	1	80.8	98.4252	29	3.44828
DvSAG_27_A8	Ga0115656_1015955	3	86.0667	98.3871	29	10.3448
DvSAG_27_A8	Ga0115657_1003330	4	84.845	98.3966	29	13.7931
DvSAG_27_A8	Ga0115657_1016757	1	80.83	100	29	3.44828
DvSAG_27_A8	Ga0115662_1001706	1	91.96	100	29	3.44828
DvSAG_27_A8	Ga0115662_1003798	4	89.93	98.9637	29	13.7931
DvSAG_27_A8	Ga0115662_1005162	4	89.935	98.3638	29	13.7931
DvSAG_27_A8	Ga0115662_1006290	5	90.144	100.395	29	17.2414
DvSAG_27_A8	Ga0115662_1006403	2	96.475	100	29	6.89655
DvSAG_27_A8	Ga0115662_1009885	1	82.95	100	29	3.44828
DvSAG_27_A8	Ga0115662_1010960	7	89.7729	99.4613	29	24.1379
DvSAG_27_A8	Ga0115662_1014233	1	89.6	100	29	3.44828
DvSAG_27_A8	Ga0115662_1017663	1	80	98.3607	29	3.44828
DvSAG_27_A8	Ga0115662_1017942	2	86.28	98.9209	29	6.89655
DvSAG_27_A8	Ga0115662_1018831	3	86.0667	98.3871	29	10.3448
DvSAG_27_A8	Ga0115662_1021642	1	81	99.0099	29	3.44828
DvSAG_27_A8	Ga0115662_1021725	1	86.25	100	29	3.44828
DvSAG_27_A8	Ga0115663_1002911	1	85.76	99.67	29	3.44828
DvSAG_27_A8	Ga0117901_1013105	1	83.41	97.3799	29	3.44828
DvSAG_27_A8	Ga0117901_1019572	2	96.27	100	29	6.89655
DvSAG_27_A8	Ga0117931_1009101	1	88.73	100	29	3.44828
DvSAG_27_A8	Ga0117931_1017846	2	85.415	98.9209	29	6.89655
DvSAG_27_A8	Ga0118710_1006784	2	88.7	100	29	6.89655
DvSAG_27_A8	Ga0118710_1007245	4	87.14	97.9227	29	13.7931
DvSAG_27_A8	Ga0118710_1008940	2	96.15	100	29	6.89655
DvSAG_27_A8	Ga0118710_1011201	4	89.93	98.9637	29	13.7931
DvSAG_27_A8	Ga0118710_1013770	6	90.86	100.329	29	20.6897
DvSAG_27_A8	Ga0118710_1014082	4	89.935	98.3638	29	13.7931
DvSAG_27_A8	Ga0118710_1015299	1	84.44	100	29	3.44828
DvSAG_27_A8	Ga0118710_1016266	5	90.402	99.0977	29	17.2414
DvSAG_27_A8	Ga0118710_1020695	3	95.7967	100	29	10.3448
DvSAG_27_A8	Ga0118710_1029063	1	82.22	104.651	29	3.44828
DvSAG_27_A8	Ga0118710_1040744	2	86.28	98.9209	29	6.89655
DvSAG_27_A8	Ga0118710_1042393	3	86.0667	98.3871	29	10.3448
DvSAG_27_A8	Ga0118710_1047500	1	81	99.0099	29	3.44828
DvSAG_27_A8	Ga0118711_1003876	1	80.8	98.4252	29	3.44828
DvSAG_27_A8	Ga0118711_1015955	3	86.0667	98.3871	29	10.3448
DvSAG_27_A8	Ga0118712_1003330	4	84.845	98.3966	29	13.7931
DvSAG_27_A8	Ga0118712_1016757	1	80.83	100	29	3.44828
DvSAG_27_A8	Ga0118715_1013105	1	83.41	97.3799	29	3.44828
DvSAG_27_A8	Ga0118715_1019572	2	96.27	100	29	6.89655
DvSAG_27_A8	Ga0118716_1003375	1	82.72	99.7389	29	3.44828
DvSAG_27_A8	Ga0118717_1001562	5	90.144	100.395	29	17.2414
DvSAG_27_A8	Ga0118717_1001801	1	91.96	100	29	3.44828
DvSAG_27_A8	Ga0118717_1003818	4	89.93	98.9637	29	13.7931
DvSAG_27_A8	Ga0118717_1003857	1	81.03	100.247	29	3.44828
DvSAG_27_A8	Ga0118717_1005108	1	84.44	100	29	3.44828
DvSAG_27_A8	Ga0118717_1006023	1	85.71	95.4545	29	3.44828
DvSAG_27_A8	Ga0118717_1006184	2	96.475	100	29	6.89655
DvSAG_27_A8	Ga0118717_1006288	6	90.165	99.1179	29	20.6897
DvSAG_27_A8	Ga0118717_1007427	1	80.72	93.7853	29	3.44828
DvSAG_27_A8	Ga0118717_1007477	1	84.09	100	29	3.44828
DvSAG_27_A8	Ga0118717_1008019	1	86.46	100	29	3.44828
DvSAG_27_A8	Ga0118717_1008748	4	89.935	98.3638	29	13.7931
DvSAG_27_A8	Ga0118717_1009913	1	80	104.167	29	3.44828
DvSAG_27_A8	Ga0118717_1011582	4	91.415	97.452	29	13.7931
DvSAG_27_A8	Ga0118717_1011872	1	91.96	100	29	3.44828
DvSAG_27_A8	Ga0118717_1013801	1	80	98.3607	29	3.44828
DvSAG_27_A8	Ga0118717_1013912	1	86.49	100	29	3.44828
DvSAG_27_A8	Ga0118717_1016197	2	86.28	98.9209	29	6.89655
DvSAG_27_A8	Ga0118717_1017080	3	86.0667	98.3871	29	10.3448
DvSAG_27_A8	Ga0118717_1017659	4	87.8525	99.0572	29	13.7931
DvSAG_27_A8	Ga0118717_1020233	1	81	99.0099	29	3.44828
DvSAG_27_A8	Ga0118718_1002743	1	91.96	100	29	3.44828
DvSAG_27_A8	Ga0118718_1003144	1	84.62	100	29	3.44828
DvSAG_27_A8	Ga0118718_1003561	9	88.4644	99.3902	29	31.0345
DvSAG_27_A8	Ga0118718_1005721	1	86.46	100	29	3.44828
DvSAG_27_A8	Ga0118718_1005951	4	89.93	98.9637	29	13.7931
DvSAG_27_A8	Ga0118718_1006119	1	81.82	94.8276	29	3.44828
DvSAG_27_A8	Ga0118718_1007495	4	89.935	98.3638	29	13.7931
DvSAG_27_A8	Ga0118718_1011237	2	96.475	100	29	6.89655
DvSAG_27_A8	Ga0118718_1011479	10	88.84	99.7955	29	34.4828
DvSAG_27_A8	Ga0118718_1012889	1	86.36	100	29	3.44828
DvSAG_27_A8	Ga0118718_1014794	5	90.402	99.0977	29	17.2414
DvSAG_27_A8	Ga0118718_1017083	1	80	98.3607	29	3.44828
DvSAG_27_A8	Ga0118718_1017723	1	91.96	100	29	3.44828
DvSAG_27_A8	Ga0118718_1021698	2	86.03	92.8963	29	6.89655
DvSAG_27_A8	Ga0118718_1022794	2	86.28	98.9209	29	6.89655
DvSAG_27_A8	Ga0118718_1023083	4	90.9675	97.5397	29	13.7931
DvSAG_27_A8	Ga0118718_1023821	3	86.0667	98.3871	29	10.3448
DvSAG_27_A8	Ga0118718_1024952	3	85.6967	95.4027	29	10.3448
DvSAG_27_A8	Ga0118718_1027218	1	81	99.0099	29	3.44828
DvSAG_27_A8	Ga0118722_1009852	4	89.8675	99.4604	29	13.7931
DvSAG_27_A8	Ga0118728_1001134	1	96.59	98.8764	29	3.44828
DvSAG_27_A8	Ga0118728_1001404	7	89.0029	98.9068	29	24.1379
DvSAG_27_A8	Ga0118728_1005058	3	96.3233	100	29	10.3448
DvSAG_27_A8	Ga0118728_1006163	5	88.428	98.6704	29	17.2414
DvSAG_27_A8	Ga0118729_1000083	1	81.07	98.2558	29	3.44828
DvSAG_27_A8	Ga0118729_1004960	2	93.825	100	29	6.89655
DvSAG_27_A8	Ga0118729_1005338	3	94.9767	100	29	10.3448
DvSAG_27_A8	Ga0118729_1005709	4	87.985	99.4156	29	13.7931
DvSAG_27_A8	Ga0118729_1006706	4	88.0175	98.338	29	13.7931
DvSAG_27_A8	Ga0118729_1007233	1	88.52	98.3871	29	3.44828
DvSAG_27_A8	Ga0118729_1012006	3	89.7833	98.4207	29	10.3448
DvSAG_27_A8	Ga0118729_1012859	2	89.815	100	29	6.89655
DvSAG_27_A8	Ga0118730_1001854	5	84.49	98.3808	29	17.2414
DvSAG_27_A8	Ga0118730_1007179	3	93.8	100	29	10.3448
DvSAG_27_A8	Ga0129342_1000964	1	80.85	97.9167	29	3.44828
DvSAG_27_A8	Ga0133547_10006147	1	92.68	100	29	3.44828
DvSAG_27_A8	Ga0133547_10011998	13	89.9254	99.1524	29	44.8276
DvSAG_27_A8	Ga0133547_10016302	1	81.92	100	29	3.44828
DvSAG_27_A8	Ga0133547_10017464	2	80.165	99.1936	29	6.89655
DvSAG_27_A8	Ga0133547_10022937	1	92.59	100	29	3.44828
DvSAG_27_A8	Ga0133547_10025284	1	80.33	92.4242	29	3.44828
DvSAG_27_A8	Ga0133547_10025654	3	85.6767	98.3574	29	10.3448
DvSAG_27_A8	Ga0133547_10031219	1	80.79	99.6835	29	3.44828
DvSAG_27_A8	Ga0133547_10031400	4	88.915	99.5223	29	13.7931
DvSAG_27_A8	Ga0133547_10045600	1	90	100	29	3.44828
DvSAG_27_A8	Ga0133547_10045840	1	81.08	100	29	3.44828
DvSAG_27_A8	Ga0133547_10049414	1	92	100	29	3.44828
DvSAG_27_A8	Ga0133547_10062193	1	81.1	99.2188	29	3.44828
DvSAG_27_A8	Ga0133547_10070414	5	89.148	99.421	29	17.2414
DvSAG_27_A8	Ga0133547_10084807	5	86.268	97.9535	29	17.2414
DvSAG_27_A8	Ga0136644_10002434	1	85.06	97.7528	29	3.44828
DvSAG_27_A8	Ga0136656_1003056	1	80.63	99.4334	29	3.44828
DvSAG_27_A8	Ga0160423_10000596	1	88.89	91.6667	29	3.44828
DvSAG_27_A8	Ga0163108_10000403	1	88.97	99.3151	29	3.44828
DvSAG_27_A8	Ga0163108_10003563	1	95.51	100	29	3.44828
DvSAG_27_A8	Ga0163108_10005093	1	81.45	100.251	29	3.44828
DvSAG_27_A8	Ga0163108_10013383	4	90.8175	98.9857	29	13.7931
DvSAG_27_A8	Ga0163110_10000592	1	80.12	96.5116	29	3.44828
DvSAG_27_A8	Ga0163179_10004452	1	88.62	99.1935	29	3.44828
DvSAG_27_A8	Ga0163180_10001050	1	94.29	98.3146	29	3.44828
DvSAG_27_A8	Ga0163180_10004856	6	91.7717	98.815	29	20.6897
DvSAG_27_A8	Ga0163180_10005085	1	86.74	100	29	3.44828
DvSAG_27_A8	Ga0163180_10009420	1	82.05	100	29	3.44828
DvSAG_27_A8	Ga0163180_10011259	1	84.62	100	29	3.44828
DvSAG_27_A8	Ga0172373_10005891	1	86.21	93.5484	29	3.44828
DvSAG_27_A8	Ga0172380_10000292	1	82.05	90.6977	29	3.44828
DvSAG_27_A8	Ga0180432_10015476	2	88.585	95.727	29	6.89655
DvSAG_27_A8	Ga0180433_10000674	4	88.345	98.879	29	13.7931
DvSAG_27_A8	Ga0180434_10002095	4	88.375	97.7968	29	13.7931
DvSAG_27_A8	Ga0180437_10001570	4	88.345	98.879	29	13.7931
DvSAG_27_A8	Ga0180438_10000234	4	88.375	97.7968	29	13.7931
DvSAG_27_A8	Ga0181394_1000187	1	87.88	100	29	3.44828
DvSAG_27_A8	Ga0181394_1001155	1	88.89	100	29	3.44828
DvSAG_27_A8	Ga0181395_1001757	2	82.805	96.5026	29	6.89655
DvSAG_27_A8	Ga0181406_1003438	1	81.36	92.1875	29	3.44828
DvSAG_27_A8	Ga0181412_1002849	1	80	100	29	3.44828
DvSAG_27_A8	Ga0181413_1002890	1	81.36	92.1875	29	3.44828
DvSAG_27_A8	Ga0181419_1001097	1	80.56	100	29	3.44828
DvSAG_27_A8	Ga0181422_1001138	1	81.36	92.1875	29	3.44828
DvSAG_27_A8	Ga0181423_1002567	1	80	100	29	3.44828
DvSAG_27_A8	Ga0181433_1001517	1	82.26	91.1765	29	3.44828
DvSAG_27_A8	Ga0181568_10009039	1	84.26	99.0826	29	3.44828
DvSAG_27_A8	Ga0181570_10000443	1	80.58	100	29	3.44828
DvSAG_27_A8	Ga0181580_10000827	1	83.33	92.3077	29	3.44828
DvSAG_27_A8	Ga0181580_10008412	1	83.33	97.2973	29	3.44828
DvSAG_27_A8	Ga0181583_10000232	1	85.38	100	29	3.44828
DvSAG_27_A8	Ga0181587_10019175	1	86.62	100	29	3.44828
DvSAG_27_A8	Ga0181590_10003816	1	83.19	92.623	29	3.44828
DvSAG_27_A8	Ga0181591_10011440	1	82.98	100	29	3.44828
DvSAG_27_A8	Ga0181592_10002564	1	88.07	98.1982	29	3.44828
DvSAG_27_A8	Ga0181592_10013806	1	80	98.4848	29	3.44828
DvSAG_27_A8	Ga0181606_10003787	1	80	95.7447	29	3.44828
DvSAG_27_A8	Ga0183748_1000003	1	81.29	97.1591	29	3.44828
DvSAG_27_A8	Ga0183748_1000220	2	87.435	100	29	6.89655
DvSAG_27_A8	Ga0183748_1000462	1	84.33	100	29	3.44828
DvSAG_27_A8	Ga0183748_1001031	1	88.02	97.6608	29	3.44828
DvSAG_27_A8	Ga0183748_1001059	2	90.695	100	29	6.89655
DvSAG_27_A8	Ga0183748_1001394	1	89.53	99.422	29	3.44828
DvSAG_27_A8	Ga0183748_1001417	3	91.4967	98.7374	29	10.3448
DvSAG_27_A8	Ga0183748_1001477	4	87.52	97.9432	29	13.7931
DvSAG_27_A8	Ga0183748_1001676	3	87.72	99.4025	29	10.3448
DvSAG_27_A8	Ga0183748_1001784	2	86.78	100	29	6.89655
DvSAG_27_A8	Ga0183748_1002090	4	81.38	98.8486	29	13.7931
DvSAG_27_A8	Ga0183748_1003285	1	95.31	98.4615	29	3.44828
DvSAG_27_A8	Ga0183748_1003326	2	83.63	99.8798	29	6.89655
DvSAG_27_A8	Ga0183748_1003911	1	90.48	98.8235	29	3.44828
DvSAG_27_A8	Ga0183748_1004083	1	85.25	98.9189	29	3.44828
DvSAG_27_A8	Ga0183757_1000167	2	90.52	100	29	6.89655
DvSAG_27_A8	Ga0183757_1000350	2	91.72	100	29	6.89655
DvSAG_27_A8	Ga0183757_1000476	2	86.795	99.711	29	6.89655
DvSAG_27_A8	Ga0183757_1000653	1	93.89	100	29	3.44828
DvSAG_27_A8	Ga0183757_1000842	4	90.9825	100.163	29	13.7931
DvSAG_27_A8	Ga0183757_1001303	4	81.5275	98.8426	29	13.7931
DvSAG_27_A8	Ga0183757_1001347	3	86.1067	98.6995	29	10.3448
DvSAG_27_A8	Ga0183757_1001465	4	88.2225	98.1768	29	13.7931
DvSAG_27_A8	Ga0183757_1001759	3	81.5733	100.088	29	10.3448
DvSAG_27_A8	Ga0187221_1001798	1	84.88	92.4731	29	3.44828
DvSAG_27_A8	Ga0194115_10001335	1	87.85	95.5357	29	3.44828
DvSAG_27_A8	Ga0194123_10018021	1	86.03	99.2701	29	3.44828
DvSAG_27_A8	Ga0194127_10001913	1	88.66	96.0396	29	3.44828
DvSAG_27_A8	Ga0194130_10012168	1	90.12	94.186	29	3.44828
DvSAG_27_A8	Ga0196899_1000648	4	87.505	97.5118	29	13.7931
DvSAG_27_A8	Ga0206123_10000215	1	86.36	100	29	3.44828
DvSAG_27_A8	Ga0206123_10000859	1	92.22	98.9011	29	3.44828
DvSAG_27_A8	Ga0206123_10001122	1	93.25	100	29	3.44828
DvSAG_27_A8	Ga0206123_10003538	2	92.49	96.2121	29	6.89655
DvSAG_27_A8	Ga0206123_10003884	1	81.82	100	29	3.44828
DvSAG_27_A8	Ga0206124_10006489	1	93.25	100	29	3.44828
DvSAG_27_A8	Ga0206125_10000293	2	92.49	96.2121	29	6.89655
DvSAG_27_A8	Ga0206125_10002874	1	82.57	99.0909	29	3.44828
DvSAG_27_A8	Ga0206125_10006590	1	92.22	98.9011	29	3.44828
DvSAG_27_A8	Ga0206126_10000025	1	81.21	100	29	3.44828
DvSAG_27_A8	Ga0206126_10000176	2	92.49	96.2121	29	6.89655
DvSAG_27_A8	Ga0206127_1011326	2	92.09	96.2121	29	6.89655
DvSAG_27_A8	Ga0206129_10008748	1	84.85	99	29	3.44828
DvSAG_27_A8	Ga0206130_10000970	1	96.43	96.5517	29	3.44828
DvSAG_27_A8	Ga0206686_1000024	1	86.96	96.4072	29	3.44828
DvSAG_27_A8	Ga0208010_1000514	4	84.1725	98.8698	29	13.7931
DvSAG_27_A8	Ga0208010_1001417	1	81.6	99.2063	29	3.44828
DvSAG_27_A8	Ga0208010_1001512	3	91	99.8117	29	10.3448
DvSAG_27_A8	Ga0208010_1001641	3	84.8233	98.992	29	10.3448
DvSAG_27_A8	Ga0208010_1002757	3	87.4967	98.7429	29	10.3448
DvSAG_27_A8	Ga0208011_1000060	3	85.1	99.41	29	10.3448
DvSAG_27_A8	Ga0208011_1000277	4	89.455	99.5364	29	13.7931
DvSAG_27_A8	Ga0208011_1000393	1	81.51	99.5717	29	3.44828
DvSAG_27_A8	Ga0208011_1000514	4	91.325	99.2007	29	13.7931
DvSAG_27_A8	Ga0208011_1000843	2	84.6	99.763	29	6.89655
DvSAG_27_A8	Ga0208011_1000884	5	89.37	99.5664	29	17.2414
DvSAG_27_A8	Ga0208011_1000899	1	85.95	91.133	29	3.44828
DvSAG_27_A8	Ga0208011_1001519	3	86.6267	100	29	10.3448
DvSAG_27_A8	Ga0208011_1001582	1	89.89	100	29	3.44828
DvSAG_27_A8	Ga0208011_1001596	4	91.25	99.4929	29	13.7931
DvSAG_27_A8	Ga0208011_1003423	3	90.69	99.6234	29	10.3448
DvSAG_27_A8	Ga0208012_1000040	1	80.7	93.4426	29	3.44828
DvSAG_27_A8	Ga0208012_1000072	2	84.76	97.7113	29	6.89655
DvSAG_27_A8	Ga0208012_1000103	3	91.9967	100	29	10.3448
DvSAG_27_A8	Ga0208012_1000120	1	89.83	100	29	3.44828
DvSAG_27_A8	Ga0208012_1000291	8	90.8812	99.9023	29	27.5862
DvSAG_27_A8	Ga0208012_1000293	2	94.07	100.572	29	6.89655
DvSAG_27_A8	Ga0208012_1000344	4	87.19	99.458	29	13.7931
DvSAG_27_A8	Ga0208012_1000368	1	96.05	100	29	3.44828
DvSAG_27_A8	Ga0208012_1000388	1	87.01	101.143	29	3.44828
DvSAG_27_A8	Ga0208012_1000427	1	83.18	98.1651	29	3.44828
DvSAG_27_A8	Ga0208012_1000505	2	89.405	98.8299	29	6.89655
DvSAG_27_A8	Ga0208012_1000534	6	89.34	101.534	29	20.6897
DvSAG_27_A8	Ga0208012_1000610	1	87.18	100.862	29	3.44828
DvSAG_27_A8	Ga0208012_1000637	1	84.75	96.7213	29	3.44828
DvSAG_27_A8	Ga0208012_1000639	5	89.584	99.3887	29	17.2414
DvSAG_27_A8	Ga0208012_1000740	4	87.9125	98.4932	29	13.7931
DvSAG_27_A8	Ga0208012_1000868	1	80.95	100	29	3.44828
DvSAG_27_A8	Ga0208012_1001060	1	93.48	97.8723	29	3.44828
DvSAG_27_A8	Ga0208013_1000524	5	88.568	99.8438	29	17.2414
DvSAG_27_A8	Ga0208013_1000737	4	87.295	99.0548	29	13.7931
DvSAG_27_A8	Ga0208013_1001103	2	90.13	98.7845	29	6.89655
DvSAG_27_A8	Ga0208013_1001198	1	80.47	99.4118	29	3.44828
DvSAG_27_A8	Ga0208013_1001259	6	88.2583	98.9955	29	20.6897
DvSAG_27_A8	Ga0208013_1001342	1	90.28	100	29	3.44828
DvSAG_27_A8	Ga0208013_1001536	6	89.34	101.534	29	20.6897
DvSAG_27_A8	Ga0208013_1002123	1	93.48	97.8723	29	3.44828
DvSAG_27_A8	Ga0208013_1002237	1	89.33	99.3377	29	3.44828
DvSAG_27_A8	Ga0208013_1002797	1	80.8	98.4252	29	3.44828
DvSAG_27_A8	Ga0208013_1002842	4	92.33	100	29	13.7931
DvSAG_27_A8	Ga0208013_1002897	1	80	91.6667	29	3.44828
DvSAG_27_A8	Ga0208019_1000255	2	87.445	100	29	6.89655
DvSAG_27_A8	Ga0208019_1000349	1	89.42	99.0476	29	3.44828
DvSAG_27_A8	Ga0208019_1004157	2	86.6	95.4545	29	6.89655
DvSAG_27_A8	Ga0208029_1000940	1	80.24	95.4286	29	3.44828
DvSAG_27_A8	Ga0208029_1001146	1	82.86	97.2222	29	3.44828
DvSAG_27_A8	Ga0208030_1000213	5	85.328	99.2438	29	17.2414
DvSAG_27_A8	Ga0208030_1000338	2	81.43	97.8078	29	6.89655
DvSAG_27_A8	Ga0208030_1001124	2	81.455	100	29	6.89655
DvSAG_27_A8	Ga0208030_1001414	2	88.475	96.8455	29	6.89655
DvSAG_27_A8	Ga0208030_1001591	1	90	100	29	3.44828
DvSAG_27_A8	Ga0208030_1002358	1	81.12	100	29	3.44828
DvSAG_27_A8	Ga0208030_1002365	3	81.92	99.0986	29	10.3448
DvSAG_27_A8	Ga0208030_1002697	1	81.24	99.7942	29	3.44828
DvSAG_27_A8	Ga0208030_1002915	4	85.7075	99.4015	29	13.7931
DvSAG_27_A8	Ga0208030_1002920	2	92.675	100	29	6.89655
DvSAG_27_A8	Ga0208030_1003368	1	85.07	99.654	29	3.44828
DvSAG_27_A8	Ga0208030_1003450	1	82.86	100	29	3.44828
DvSAG_27_A8	Ga0208150_1003710	1	85.25	98.3871	29	3.44828
DvSAG_27_A8	Ga0208156_1000269	4	91.625	99.4445	29	13.7931
DvSAG_27_A8	Ga0208156_1000494	3	84.9133	99.2523	29	10.3448
DvSAG_27_A8	Ga0208156_1000649	2	93.115	99.7175	29	6.89655
DvSAG_27_A8	Ga0208156_1000725	5	87.578	99.0943	29	17.2414
DvSAG_27_A8	Ga0208156_1000729	1	83.53	99.7653	29	3.44828
DvSAG_27_A8	Ga0208156_1000976	1	87.52	100	29	3.44828
DvSAG_27_A8	Ga0208156_1001294	1	82.26	98.4127	29	3.44828
DvSAG_27_A8	Ga0208156_1001773	1	83.12	100	29	3.44828
DvSAG_27_A8	Ga0208160_1001189	1	87.93	93.5484	29	3.44828
DvSAG_27_A8	Ga0208160_1002229	1	90.12	98.7805	29	3.44828
DvSAG_27_A8	Ga0208161_1005763	1	87.93	93.5484	29	3.44828
DvSAG_27_A8	Ga0208162_1000669	1	83.46	99.6169	29	3.44828
DvSAG_27_A8	Ga0208162_1000976	2	86.16	95.4545	29	6.89655
DvSAG_27_A8	Ga0208162_1001130	1	80.56	100	29	3.44828
DvSAG_27_A8	Ga0208162_1002859	1	80	100	29	3.44828
DvSAG_27_A8	Ga0208162_1005984	1	87.93	93.5484	29	3.44828
DvSAG_27_A8	Ga0208179_1000438	2	85.12	97.7143	29	6.89655
DvSAG_27_A8	Ga0208182_1002124	2	85.12	97.7143	29	6.89655
DvSAG_27_A8	Ga0208183_1000161	2	85.12	97.7143	29	6.89655
DvSAG_27_A8	Ga0208183_1002249	1	92.86	100	29	3.44828
DvSAG_27_A8	Ga0208298_1002578	1	80	91.6667	29	3.44828
DvSAG_27_A8	Ga0208299_1000086	1	81.36	93.6508	29	3.44828
DvSAG_27_A8	Ga0208299_1000443	1	82.86	99.2908	29	3.44828
DvSAG_27_A8	Ga0208299_1000471	1	87.5	100	29	3.44828
DvSAG_27_A8	Ga0208299_1000601	1	89.8	100	29	3.44828
DvSAG_27_A8	Ga0208299_1000686	1	83.05	99.1597	29	3.44828
DvSAG_27_A8	Ga0208299_1000734	1	80.7	90.4762	29	3.44828
DvSAG_27_A8	Ga0208299_1001189	2	95.11	100	29	6.89655
DvSAG_27_A8	Ga0208299_1001452	4	89.69	99.6549	29	13.7931
DvSAG_27_A8	Ga0208299_1001496	2	98.025	100	29	6.89655
DvSAG_27_A8	Ga0208299_1001519	1	88.24	98.5507	29	3.44828
DvSAG_27_A8	Ga0208299_1001529	5	89.272	99.8438	29	17.2414
DvSAG_27_A8	Ga0208299_1001588	1	84.81	95.1807	29	3.44828
DvSAG_27_A8	Ga0208299_1001640	2	87.88	100.572	29	6.89655
DvSAG_27_A8	Ga0208299_1001790	5	88.674	98.6332	29	17.2414
DvSAG_27_A8	Ga0208299_1001822	1	87	99.0099	29	3.44828
DvSAG_27_A8	Ga0208299_1002020	1	87.5	100	29	3.44828
DvSAG_27_A8	Ga0208299_1002046	5	88.14	99.5474	29	17.2414
DvSAG_27_A8	Ga0208299_1002106	1	82.8	100	29	3.44828
DvSAG_27_A8	Ga0208299_1002177	4	89.755	99.4936	29	13.7931
DvSAG_27_A8	Ga0208299_1002296	1	82.35	100	29	3.44828
DvSAG_27_A8	Ga0208299_1002303	1	83.87	100	29	3.44828
DvSAG_27_A8	Ga0208299_1002455	1	81.72	100	29	3.44828
DvSAG_27_A8	Ga0208299_1002482	5	89.902	99.3887	29	17.2414
DvSAG_27_A8	Ga0208299_1002505	1	89.8	100	29	3.44828
DvSAG_27_A8	Ga0208299_1002529	2	92.905	100	29	6.89655
DvSAG_27_A8	Ga0208299_1003869	1	84.62	100	29	3.44828
DvSAG_27_A8	Ga0208299_1003908	1	80.7	90.4762	29	3.44828
DvSAG_27_A8	Ga0208299_1003911	1	82.76	90.625	29	3.44828
DvSAG_27_A8	Ga0208299_1004074	1	88.24	100	29	3.44828
DvSAG_27_A8	Ga0208299_1004457	1	85.85	100	29	3.44828
DvSAG_27_A8	Ga0208299_1004666	1	81.6	99.2063	29	3.44828
DvSAG_27_A8	Ga0208299_1005734	1	89.54	100	29	3.44828
DvSAG_27_A8	Ga0208299_1005951	1	84.06	98.5714	29	3.44828
DvSAG_27_A8	Ga0208299_1006626	1	80	91.6667	29	3.44828
DvSAG_27_A8	Ga0208299_1006797	2	85.2	97.4992	29	6.89655
DvSAG_27_A8	Ga0208299_1006962	3	87.6567	98.7429	29	10.3448
DvSAG_27_A8	Ga0208299_1008444	1	82.48	93.1973	29	3.44828
DvSAG_27_A8	Ga0208299_1009116	4	89.1975	99.6549	29	13.7931
DvSAG_27_A8	Ga0208299_1009183	4	87.9	99.5118	29	13.7931
DvSAG_27_A8	Ga0208315_1003936	1	82.2	100.244	29	3.44828
DvSAG_27_A8	Ga0208405_1000067	1	81.07	98.8304	29	3.44828
DvSAG_27_A8	Ga0208433_1000248	10	86.822	97.9683	29	34.4828
DvSAG_27_A8	Ga0208433_1000710	4	89.8425	99.4964	29	13.7931
DvSAG_27_A8	Ga0208433_1000784	2	92.945	100.572	29	6.89655
DvSAG_27_A8	Ga0208433_1000811	3	88.4733	100.402	29	10.3448
DvSAG_27_A8	Ga0208433_1000855	1	88.73	100	29	3.44828
DvSAG_27_A8	Ga0208433_1001167	2	89.345	98.8153	29	6.89655
DvSAG_27_A8	Ga0208433_1001190	3	88.01	98.7429	29	10.3448
DvSAG_27_A8	Ga0208433_1001191	1	81.67	100	29	3.44828
DvSAG_27_A8	Ga0208433_1001497	1	83.61	100	29	3.44828
DvSAG_27_A8	Ga0208433_1001671	1	82.03	100	29	3.44828
DvSAG_27_A8	Ga0208433_1002093	2	86.59	99.115	29	6.89655
DvSAG_27_A8	Ga0208433_1002189	1	82.81	100	29	3.44828
DvSAG_27_A8	Ga0208433_1002307	1	83.61	100	29	3.44828
DvSAG_27_A8	Ga0208449_1000636	2	85.12	97.7143	29	6.89655
DvSAG_27_A8	Ga0208449_1000979	1	80.17	97.8078	29	3.44828
DvSAG_27_A8	Ga0208449_1001376	1	81.82	100	29	3.44828
DvSAG_27_A8	Ga0208449_1001811	1	84.16	100	29	3.44828
DvSAG_27_A8	Ga0208449_1003280	2	81.455	100	29	6.89655
DvSAG_27_A8	Ga0208449_1004881	1	91.09	97.1154	29	3.44828
DvSAG_27_A8	Ga0208449_1005329	1	88.19	99.3103	29	3.44828
DvSAG_27_A8	Ga0208542_1000026	1	81.94	91.1392	29	3.44828
DvSAG_27_A8	Ga0208547_1000836	1	80.92	99.5192	29	3.44828
DvSAG_27_A8	Ga0208553_1000131	1	91.3	98.5714	29	3.44828
DvSAG_27_A8	Ga0208553_1000311	2	93.115	99.7175	29	6.89655
DvSAG_27_A8	Ga0208553_1000490	3	87.3733	98.7429	29	10.3448
DvSAG_27_A8	Ga0208553_1000725	3	84.4233	99.5859	29	10.3448
DvSAG_27_A8	Ga0208553_1000777	1	91.15	95.7627	29	3.44828
DvSAG_27_A8	Ga0208553_1001355	2	86.91	100	29	6.89655
DvSAG_27_A8	Ga0208553_1001423	1	80.52	95.8791	29	3.44828
DvSAG_27_A8	Ga0208553_1001451	1	88.24	96.5909	29	3.44828
DvSAG_27_A8	Ga0208553_1001493	3	96.03	100	29	10.3448
DvSAG_27_A8	Ga0208553_1002209	3	91	99.8117	29	10.3448
DvSAG_27_A8	Ga0208553_1003017	1	91.86	94.5055	29	3.44828
DvSAG_27_A8	Ga0208644_1001186	2	83.49	100	29	6.89655
DvSAG_27_A8	Ga0208644_1005805	1	83.75	98.7654	29	3.44828
DvSAG_27_A8	Ga0208644_1013494	2	94.615	97.6191	29	6.89655
DvSAG_27_A8	Ga0208645_1003513	5	88.354	98.8159	29	17.2414
DvSAG_27_A8	Ga0208666_1000584	1	83.18	99.6894	29	3.44828
DvSAG_27_A8	Ga0208668_1000243	1	81.82	99.3056	29	3.44828
DvSAG_27_A8	Ga0208668_1000429	1	82.14	98.2456	29	3.44828
DvSAG_27_A8	Ga0208668_1000786	2	86.57	99.2754	29	6.89655
DvSAG_27_A8	Ga0208668_1002031	1	89.7	100	29	3.44828
DvSAG_27_A8	Ga0208669_1000585	6	90.335	98.8033	29	20.6897
DvSAG_27_A8	Ga0208669_1000632	1	88.89	100	29	3.44828
DvSAG_27_A8	Ga0208669_1002229	5	86.918	98.8094	29	17.2414
DvSAG_27_A8	Ga0208684_1000422	2	85.12	97.7143	29	6.89655
DvSAG_27_A8	Ga0208684_1001420	1	82.35	100	29	3.44828
DvSAG_27_A8	Ga0208684_1001621	2	81.455	100	29	6.89655
DvSAG_27_A8	Ga0208684_1003314	1	85.11	94	29	3.44828
DvSAG_27_A8	Ga0208684_1004232	1	83.8	99.3007	29	3.44828
DvSAG_27_A8	Ga0208684_1005327	2	82.89	100	29	6.89655
DvSAG_27_A8	Ga0208767_1000381	1	86.67	100	29	3.44828
DvSAG_27_A8	Ga0208767_1001066	5	88.354	98.8159	29	17.2414
DvSAG_27_A8	Ga0208790_1000083	1	82.03	100	29	3.44828
DvSAG_27_A8	Ga0208790_1000136	3	89.73	98.5395	29	10.3448
DvSAG_27_A8	Ga0208790_1000148	1	93.75	100	29	3.44828
DvSAG_27_A8	Ga0208790_1000173	1	81.67	100	29	3.44828
DvSAG_27_A8	Ga0208790_1000202	2	88.825	97.3697	29	6.89655
DvSAG_27_A8	Ga0208790_1000219	2	96.955	100	29	6.89655
DvSAG_27_A8	Ga0208790_1000535	1	82.54	100	29	3.44828
DvSAG_27_A8	Ga0208790_1000667	1	95.38	100	29	3.44828
DvSAG_27_A8	Ga0208790_1000697	4	91.2625	99.2929	29	13.7931
DvSAG_27_A8	Ga0208790_1000719	4	93.3375	100.066	29	13.7931
DvSAG_27_A8	Ga0208790_1000810	1	81.16	97.1831	29	3.44828
DvSAG_27_A8	Ga0208790_1000891	1	82.61	98.5714	29	3.44828
DvSAG_27_A8	Ga0208790_1000894	5	89.528	99.5664	29	17.2414
DvSAG_27_A8	Ga0208790_1000911	1	82.17	100.213	29	3.44828
DvSAG_27_A8	Ga0208790_1000956	3	86.6267	100	29	10.3448
DvSAG_27_A8	Ga0208790_1001108	1	81.58	100	29	3.44828
DvSAG_27_A8	Ga0208790_1001228	1	81.1	100.213	29	3.44828
DvSAG_27_A8	Ga0208790_1001741	1	83.67	98	29	3.44828
DvSAG_27_A8	Ga0208790_1001838	1	82.35	100	29	3.44828
DvSAG_27_A8	Ga0208790_1001893	3	84.9467	99.2523	29	10.3448
DvSAG_27_A8	Ga0208790_1001951	1	94.22	100	29	3.44828
DvSAG_27_A8	Ga0208790_1002307	2	84.355	98.0964	29	6.89655
DvSAG_27_A8	Ga0208790_1002365	2	84.6	100	29	6.89655
DvSAG_27_A8	Ga0208790_1002734	4	92.255	100	29	13.7931
DvSAG_27_A8	Ga0208790_1003160	4	89.7375	99.6311	29	13.7931
DvSAG_27_A8	Ga0208790_1004632	1	96.47	98.8372	29	3.44828
DvSAG_27_A8	Ga0208790_1004720	5	90.858	99.5652	29	17.2414
DvSAG_27_A8	Ga0208792_1001284	1	85.71	100	29	3.44828
DvSAG_27_A8	Ga0208793_1000431	1	92.78	100	29	3.44828
DvSAG_27_A8	Ga0208793_1004733	1	80	91.6667	29	3.44828
DvSAG_27_A8	Ga0208793_1005255	1	93.33	97.8261	29	3.44828
DvSAG_27_A8	Ga0208794_1000660	1	84.75	100	29	3.44828
DvSAG_27_A8	Ga0208794_1002170	4	88.985	99.305	29	13.7931
DvSAG_27_A8	Ga0208795_1004284	1	87.93	93.5484	29	3.44828
DvSAG_27_A8	Ga0208795_1004654	1	92.11	98.7013	29	3.44828
DvSAG_27_A8	Ga0208814_1001130	1	88.32	100	29	3.44828
DvSAG_27_A8	Ga0208899_1000990	1	84.72	98.6301	29	3.44828
DvSAG_27_A8	Ga0208899_1001643	1	84.87	93.2515	29	3.44828
DvSAG_27_A8	Ga0208899_1006487	4	89.8975	98.5198	29	13.7931
DvSAG_27_A8	Ga0208917_1006673	1	87.27	100	29	3.44828
DvSAG_27_A8	Ga0208919_1002798	1	83.08	99.0854	29	3.44828
DvSAG_27_A8	Ga0208920_1001679	1	88.24	100	29	3.44828
DvSAG_27_A8	Ga0208950_1002154	1	81.03	90.625	29	3.44828
DvSAG_27_A8	Ga0208950_1004855	1	88.89	99.5745	29	3.44828
DvSAG_27_A8	Ga0208973_1000216	1	81.03	90.625	29	3.44828
DvSAG_27_A8	Ga0209128_1000014	1	83.78	99.5516	29	3.44828
DvSAG_27_A8	Ga0209128_1000062	11	93.1927	100.187	29	37.931
DvSAG_27_A8	Ga0209128_1000091	1	80.33	100	29	3.44828
DvSAG_27_A8	Ga0209128_1000175	3	97.3533	100	29	10.3448
DvSAG_27_A8	Ga0209128_1000242	1	95.52	100	29	3.44828
DvSAG_27_A8	Ga0209128_1000261	1	86.15	100	29	3.44828
DvSAG_27_A8	Ga0209128_1000498	1	85.71	100	29	3.44828
DvSAG_27_A8	Ga0209128_1000619	1	81.65	99.6269	29	3.44828
DvSAG_27_A8	Ga0209128_1000766	3	87.7167	97.5309	29	10.3448
DvSAG_27_A8	Ga0209128_1000786	2	92.41	100	29	6.89655
DvSAG_27_A8	Ga0209128_1000792	2	82.13	100	29	6.89655
DvSAG_27_A8	Ga0209128_1000923	1	89.12	100	29	3.44828
DvSAG_27_A8	Ga0209128_1000947	6	90.3617	99.5134	29	20.6897
DvSAG_27_A8	Ga0209128_1001048	5	89.374	99.4137	29	17.2414
DvSAG_27_A8	Ga0209128_1001049	7	94.8686	99.6356	29	24.1379
DvSAG_27_A8	Ga0209128_1001052	2	80.425	100	29	6.89655
DvSAG_27_A8	Ga0209128_1001095	1	82.08	92.1739	29	3.44828
DvSAG_27_A8	Ga0209128_1001148	1	82.75	99.7821	29	3.44828
DvSAG_27_A8	Ga0209128_1001170	1	84.75	96.7213	29	3.44828
DvSAG_27_A8	Ga0209128_1001172	1	81.48	100	29	3.44828
DvSAG_27_A8	Ga0209128_1001213	1	81.97	100	29	3.44828
DvSAG_27_A8	Ga0209128_1001337	2	92.83	99.7175	29	6.89655
DvSAG_27_A8	Ga0209128_1001397	1	80.45	98.6464	29	3.44828
DvSAG_27_A8	Ga0209128_1001438	3	90.6067	100	29	10.3448
DvSAG_27_A8	Ga0209128_1001475	4	87.24	98.09	29	13.7931
DvSAG_27_A8	Ga0209128_1001664	1	93.97	100	29	3.44828
DvSAG_27_A8	Ga0209128_1001824	1	89.8	100	29	3.44828
DvSAG_27_A8	Ga0209128_1001831	3	91.39	100	29	10.3448
DvSAG_27_A8	Ga0209128_1001863	3	94.1467	100	29	10.3448
DvSAG_27_A8	Ga0209128_1001909	1	83.2	98.4252	29	3.44828
DvSAG_27_A8	Ga0209128_1001932	4	92.4575	99.4929	29	13.7931
DvSAG_27_A8	Ga0209128_1001960	2	89.62	99.2481	29	6.89655
DvSAG_27_A8	Ga0209128_1001976	2	91.195	100.129	29	6.89655
DvSAG_27_A8	Ga0209128_1002023	1	82	100.251	29	3.44828
DvSAG_27_A8	Ga0209128_1002077	1	85.6	99.2063	29	3.44828
DvSAG_27_A8	Ga0209128_1002115	1	83.05	93.6508	29	3.44828
DvSAG_27_A8	Ga0209128_1002270	11	100	100	29	37.931
DvSAG_27_A8	Ga0209128_1002325	1	82.98	100	29	3.44828
DvSAG_27_A8	Ga0209128_1002356	1	80.47	100	29	3.44828
DvSAG_27_A8	Ga0209128_1002412	1	96.61	96.7213	29	3.44828
DvSAG_27_A8	Ga0209128_1002417	4	83.485	99.3661	29	13.7931
DvSAG_27_A8	Ga0209128_1002437	1	84.01	100	29	3.44828
DvSAG_27_A8	Ga0209128_1002637	2	86.29	98.8235	29	6.89655
DvSAG_27_A8	Ga0209128_1002674	1	81.36	98.3333	29	3.44828
DvSAG_27_A8	Ga0209128_1002841	2	97.335	100	29	6.89655
DvSAG_27_A8	Ga0209128_1003169	1	82.13	100	29	3.44828
DvSAG_27_A8	Ga0209128_1003220	1	81.57	100	29	3.44828
DvSAG_27_A8	Ga0209128_1003222	8	88.4537	99.5471	29	27.5862
DvSAG_27_A8	Ga0209128_1003247	1	88.14	93.6508	29	3.44828
DvSAG_27_A8	Ga0209128_1003337	2	84.565	100	29	6.89655
DvSAG_27_A8	Ga0209128_1003427	1	80.77	98.7342	29	3.44828
DvSAG_27_A8	Ga0209128_1003591	13	99.5577	100.02	29	44.8276
DvSAG_27_A8	Ga0209128_1003682	1	80.6	96.1722	29	3.44828
DvSAG_27_A8	Ga0209128_1003740	2	90.875	96.0349	29	6.89655
DvSAG_27_A8	Ga0209128_1003855	3	87.5567	98.424	29	10.3448
DvSAG_27_A8	Ga0209128_1004281	1	82.05	100	29	3.44828
DvSAG_27_A8	Ga0209128_1004638	1	82.54	94.7368	29	3.44828
DvSAG_27_A8	Ga0209128_1004739	3	95.12	100	29	10.3448
DvSAG_27_A8	Ga0209128_1004767	4	84.635	96.4195	29	13.7931
DvSAG_27_A8	Ga0209128_1004903	5	86.244	98.2852	29	17.2414
DvSAG_27_A8	Ga0209128_1004954	1	88.46	100	29	3.44828
DvSAG_27_A8	Ga0209128_1005139	5	91.42	100.225	29	17.2414
DvSAG_27_A8	Ga0209128_1005181	1	80	100	29	3.44828
DvSAG_27_A8	Ga0209128_1005344	1	89.47	97.4359	29	3.44828
DvSAG_27_A8	Ga0209128_1005510	3	90.5167	98.1825	29	10.3448
DvSAG_27_A8	Ga0209128_1005555	4	90.425	99.6377	29	13.7931
DvSAG_27_A8	Ga0209128_1005762	1	91.43	100	29	3.44828
DvSAG_27_A8	Ga0209128_1007172	3	86.01	98.9071	29	10.3448
DvSAG_27_A8	Ga0209128_1007223	1	81.52	98.9247	29	3.44828
DvSAG_27_A8	Ga0209128_1007568	1	83.51	98.9796	29	3.44828
DvSAG_27_A8	Ga0209128_1007604	4	92.4025	100	29	13.7931
DvSAG_27_A8	Ga0209128_1007673	2	89.165	100	29	6.89655
DvSAG_27_A8	Ga0209128_1008301	4	85.8025	99.6377	29	13.7931
DvSAG_27_A8	Ga0209128_1008707	2	92.855	99.6774	29	6.89655
DvSAG_27_A8	Ga0209128_1009399	4	87.5775	98.6852	29	13.7931
DvSAG_27_A8	Ga0209193_1001865	1	86.54	100	29	3.44828
DvSAG_27_A8	Ga0209193_1003505	1	83.35	100.625	29	3.44828
DvSAG_27_A8	Ga0209193_1004966	2	88.565	100	29	6.89655
DvSAG_27_A8	Ga0209194_1003205	1	83.24	100	29	3.44828
DvSAG_27_A8	Ga0209232_1000112	1	83.33	98.2759	29	3.44828
DvSAG_27_A8	Ga0209232_1000919	2	90.65	99.711	29	6.89655
DvSAG_27_A8	Ga0209232_1001396	1	92	92.5926	29	3.44828
DvSAG_27_A8	Ga0209232_1002558	1	80	93.0233	29	3.44828
DvSAG_27_A8	Ga0209232_1002832	3	87.7167	99.4151	29	10.3448
DvSAG_27_A8	Ga0209232_1003117	2	90.18	99.435	29	6.89655
DvSAG_27_A8	Ga0209232_1003179	4	84.8175	97.9131	29	13.7931
DvSAG_27_A8	Ga0209232_1004025	2	81.65	98.8889	29	6.89655
DvSAG_27_A8	Ga0209232_1004905	3	89.1467	99.4347	29	10.3448
DvSAG_27_A8	Ga0209232_1006645	1	82.97	99.1342	29	3.44828
DvSAG_27_A8	Ga0209308_10009751	3	89.0233	99.7986	29	10.3448
DvSAG_27_A8	Ga0209336_10000364	1	82.76	95.082	29	3.44828
DvSAG_27_A8	Ga0209336_10000484	1	84.88	100	29	3.44828
DvSAG_27_A8	Ga0209337_1000932	1	84.67	99.6528	29	3.44828
DvSAG_27_A8	Ga0209337_1001073	1	84.88	100	29	3.44828
DvSAG_27_A8	Ga0209337_1005299	1	81.03	95.082	29	3.44828
DvSAG_27_A8	Ga0209337_1009328	1	90.11	98.3784	29	3.44828
DvSAG_27_A8	Ga0209337_1010977	1	84.25	100	29	3.44828
DvSAG_27_A8	Ga0209348_1000052	1	80.72	97.076	29	3.44828
DvSAG_27_A8	Ga0209348_1000313	1	93.33	97.8261	29	3.44828
DvSAG_27_A8	Ga0209348_1000500	1	82.02	98.8889	29	3.44828
DvSAG_27_A8	Ga0209348_1001862	1	90.38	98.1132	29	3.44828
DvSAG_27_A8	Ga0209348_1002700	1	90.62	100	29	3.44828
DvSAG_27_A8	Ga0209348_1002804	1	84.91	98.7578	29	3.44828
DvSAG_27_A8	Ga0209348_1003101	1	82.86	98.5915	29	3.44828
DvSAG_27_A8	Ga0209349_1000054	1	88.14	98.3333	29	3.44828
DvSAG_27_A8	Ga0209349_1000189	3	88.97	99.8117	29	10.3448
DvSAG_27_A8	Ga0209349_1000204	1	93.62	97.9167	29	3.44828
DvSAG_27_A8	Ga0209349_1000342	1	85.71	100	29	3.44828
DvSAG_27_A8	Ga0209349_1000375	1	82.7	100	29	3.44828
DvSAG_27_A8	Ga0209349_1000430	5	87.844	99.7436	29	17.2414
DvSAG_27_A8	Ga0209349_1000444	1	82.53	99.7821	29	3.44828
DvSAG_27_A8	Ga0209349_1000487	1	89.12	100	29	3.44828
DvSAG_27_A8	Ga0209349_1000648	11	100	100	29	37.931
DvSAG_27_A8	Ga0209349_1000760	3	83.41	99.7076	29	10.3448
DvSAG_27_A8	Ga0209349_1000808	15	100	99.4173	29	51.7241
DvSAG_27_A8	Ga0209349_1001040	3	94.1467	100	29	10.3448
DvSAG_27_A8	Ga0209349_1001135	1	82	100.251	29	3.44828
DvSAG_27_A8	Ga0209349_1001249	1	91.53	98.3333	29	3.44828
DvSAG_27_A8	Ga0209349_1001436	2	82.13	100	29	6.89655
DvSAG_27_A8	Ga0209349_1001516	1	90	99.4152	29	3.44828
DvSAG_27_A8	Ga0209349_1001590	2	84.475	100	29	6.89655
DvSAG_27_A8	Ga0209349_1001679	1	88.95	100	29	3.44828
DvSAG_27_A8	Ga0209349_1001966	1	94.86	100	29	3.44828
DvSAG_27_A8	Ga0209349_1002073	1	89.66	100	29	3.44828
DvSAG_27_A8	Ga0209349_1002293	1	80.33	100	29	3.44828
DvSAG_27_A8	Ga0209349_1002522	1	92	100	29	3.44828
DvSAG_27_A8	Ga0209349_1002550	6	89.7783	99.0232	29	20.6897
DvSAG_27_A8	Ga0209349_1002705	3	87.59	100.486	29	10.3448
DvSAG_27_A8	Ga0209349_1003227	5	85.666	98.2852	29	17.2414
DvSAG_27_A8	Ga0209349_1003473	1	83.95	100	29	3.44828
DvSAG_27_A8	Ga0209349_1003506	2	90.915	100.13	29	6.89655
DvSAG_27_A8	Ga0209349_1003848	5	96.25	100	29	17.2414
DvSAG_27_A8	Ga0209349_1004210	4	90.8175	100	29	13.7931
DvSAG_27_A8	Ga0209349_1004261	1	80	100	29	3.44828
DvSAG_27_A8	Ga0209349_1004537	4	85.3125	99.2597	29	13.7931
DvSAG_27_A8	Ga0209349_1004924	3	86.17	99.2157	29	10.3448
DvSAG_27_A8	Ga0209349_1005039	1	83.65	91.2281	29	3.44828
DvSAG_27_A8	Ga0209360_1001896	1	81.07	98.8304	29	3.44828
DvSAG_27_A8	Ga0209360_1002378	1	87.5	100	29	3.44828
DvSAG_27_A8	Ga0209400_1004013	1	84.48	90.625	29	3.44828
DvSAG_27_A8	Ga0209400_1011301	1	81.36	90.7692	29	3.44828
DvSAG_27_A8	Ga0209404_10004509	1	88.42	98.9583	29	3.44828
DvSAG_27_A8	Ga0209434_1000038	2	86.095	95	29	6.89655
DvSAG_27_A8	Ga0209434_1000054	5	94.04	100	29	17.2414
DvSAG_27_A8	Ga0209434_1000152	2	93.205	99.7175	29	6.89655
DvSAG_27_A8	Ga0209434_1000195	1	83.33	100	29	3.44828
DvSAG_27_A8	Ga0209434_1000200	6	88.8283	99.0968	29	20.6897
DvSAG_27_A8	Ga0209434_1000453	4	87.2225	98.6805	29	13.7931
DvSAG_27_A8	Ga0209434_1000467	2	88.435	98.3606	29	6.89655
DvSAG_27_A8	Ga0209434_1000573	3	88.94	99.8117	29	10.3448
DvSAG_27_A8	Ga0209434_1000575	7	90.6814	97.4097	29	24.1379
DvSAG_27_A8	Ga0209434_1000597	3	94.1467	100	29	10.3448
DvSAG_27_A8	Ga0209434_1000637	5	89.986	98.472	29	17.2414
DvSAG_27_A8	Ga0209434_1000697	1	83.61	100	29	3.44828
DvSAG_27_A8	Ga0209434_1000722	4	89.9225	99.8162	29	13.7931
DvSAG_27_A8	Ga0209434_1000766	2	87.245	98.7261	29	6.89655
DvSAG_27_A8	Ga0209434_1000825	4	85.385	96.4195	29	13.7931
DvSAG_27_A8	Ga0209434_1000881	2	88.28	98.4848	29	6.89655
DvSAG_27_A8	Ga0209434_1000883	1	95.33	100	29	3.44828
DvSAG_27_A8	Ga0209434_1000954	3	90.1633	100	29	10.3448
DvSAG_27_A8	Ga0209434_1001006	3	82.68	98.9744	29	10.3448
DvSAG_27_A8	Ga0209434_1001121	3	86.5933	98.4797	29	10.3448
DvSAG_27_A8	Ga0209434_1001196	8	88.92	99.6029	29	27.5862
DvSAG_27_A8	Ga0209434_1001261	1	96.61	96.7213	29	3.44828
DvSAG_27_A8	Ga0209434_1001313	1	83.33	100	29	3.44828
DvSAG_27_A8	Ga0209434_1001476	5	99.004	98.0779	29	17.2414
DvSAG_27_A8	Ga0209434_1001579	1	81.7	96.8354	29	3.44828
DvSAG_27_A8	Ga0209434_1002008	1	82.84	100	29	3.44828
DvSAG_27_A8	Ga0209434_1002068	1	86.89	98.3871	29	3.44828
DvSAG_27_A8	Ga0209434_1002111	5	85.002	98.1221	29	17.2414
DvSAG_27_A8	Ga0209434_1002147	1	81.1	98.4496	29	3.44828
DvSAG_27_A8	Ga0209434_1002200	1	93.67	92.9412	29	3.44828
DvSAG_27_A8	Ga0209434_1002244	1	88.55	100	29	3.44828
DvSAG_27_A8	Ga0209434_1002447	1	80.95	100.183	29	3.44828
DvSAG_27_A8	Ga0209434_1002452	1	83.01	100	29	3.44828
DvSAG_27_A8	Ga0209434_1002515	2	89.575	100	29	6.89655
DvSAG_27_A8	Ga0209434_1002564	2	95.345	100	29	6.89655
DvSAG_27_A8	Ga0209434_1002565	5	88.148	97.6021	29	17.2414
DvSAG_27_A8	Ga0209434_1002593	4	85.06	98.8678	29	13.7931
DvSAG_27_A8	Ga0209434_1002608	1	88	100	29	3.44828
DvSAG_27_A8	Ga0209434_1002704	5	87.756	99.7101	29	17.2414
DvSAG_27_A8	Ga0209434_1002846	10	100	100	29	34.4828
DvSAG_27_A8	Ga0209434_1003002	3	88.6767	100	29	10.3448
DvSAG_27_A8	Ga0209434_1003168	1	83.59	100	29	3.44828
DvSAG_27_A8	Ga0209434_1003189	3	90.0433	100	29	10.3448
DvSAG_27_A8	Ga0209434_1003197	1	94.44	100	29	3.44828
DvSAG_27_A8	Ga0209434_1003212	2	89.4	99.2188	29	6.89655
DvSAG_27_A8	Ga0209434_1003558	1	82.81	100	29	3.44828
DvSAG_27_A8	Ga0209434_1003633	2	91.77	100	29	6.89655
DvSAG_27_A8	Ga0209434_1003753	10	99.817	100.026	29	34.4828
DvSAG_27_A8	Ga0209434_1003789	4	94.3275	99.6377	29	13.7931
DvSAG_27_A8	Ga0209434_1003983	1	80	99.0991	29	3.44828
DvSAG_27_A8	Ga0209434_1004293	1	86.67	100	29	3.44828
DvSAG_27_A8	Ga0209434_1005203	1	83.33	97.6744	29	3.44828
DvSAG_27_A8	Ga0209434_1005204	2	88.465	100	29	6.89655
DvSAG_27_A8	Ga0209434_1005322	1	80.6	98.5294	29	3.44828
DvSAG_27_A8	Ga0209434_1005361	5	88.184	98.4986	29	17.2414
DvSAG_27_A8	Ga0209434_1005755	5	86.136	98.2852	29	17.2414
DvSAG_27_A8	Ga0209532_1003140	1	89.66	100	29	3.44828
DvSAG_27_A8	Ga0209532_1004560	1	83.93	94.9153	29	3.44828
DvSAG_27_A8	Ga0209535_1000472	1	84.88	100	29	3.44828
DvSAG_27_A8	Ga0209535_1001518	1	87.7	100	29	3.44828
DvSAG_27_A8	Ga0209535_1001686	1	82.76	95.082	29	3.44828
DvSAG_27_A8	Ga0209535_1003080	1	84.38	98.4615	29	3.44828
DvSAG_27_A8	Ga0209556_1002999	1	81.07	98.8304	29	3.44828
DvSAG_27_A8	Ga0209630_10012007	1	82.77	100.657	29	3.44828
DvSAG_27_A8	Ga0209631_10017220	1	80.42	100	29	3.44828
DvSAG_27_A8	Ga0209634_1004995	1	80	90.9091	29	3.44828
DvSAG_27_A8	Ga0209634_1012169	1	87.5	100	29	3.44828
DvSAG_27_A8	Ga0209645_1001623	1	88.89	100	29	3.44828
DvSAG_27_A8	Ga0209645_1002368	1	81.36	93.6508	29	3.44828
DvSAG_27_A8	Ga0209645_1005332	1	81.01	100	29	3.44828
DvSAG_27_A8	Ga0209645_1005601	1	81.36	92.1875	29	3.44828
DvSAG_27_A8	Ga0209657_1000149	1	82.99	99.5918	29	3.44828
DvSAG_27_A8	Ga0209658_1003028	2	81.57	97.8708	29	6.89655
DvSAG_27_A8	Ga0209667_1003373	1	92.68	98.7952	29	3.44828
DvSAG_27_A8	Ga0209667_1003658	1	84.09	100	29	3.44828
DvSAG_27_A8	Ga0209756_1000008	1	88.14	98.3333	29	3.44828
DvSAG_27_A8	Ga0209756_1000191	1	80.33	100	29	3.44828
DvSAG_27_A8	Ga0209756_1000227	1	96.97	97.0588	29	3.44828
DvSAG_27_A8	Ga0209756_1000298	6	92.5967	100.342	29	20.6897
DvSAG_27_A8	Ga0209756_1000333	1	81.36	96.7213	29	3.44828
DvSAG_27_A8	Ga0209756_1000407	5	91.42	100.225	29	17.2414
DvSAG_27_A8	Ga0209756_1000430	1	80.53	100	29	3.44828
DvSAG_27_A8	Ga0209756_1000455	2	97.54	100	29	6.89655
DvSAG_27_A8	Ga0209756_1000580	2	97.275	100	29	6.89655
DvSAG_27_A8	Ga0209756_1000583	1	81.88	100	29	3.44828
DvSAG_27_A8	Ga0209756_1000725	1	80.56	100	29	3.44828
DvSAG_27_A8	Ga0209756_1000813	3	88.95	100	29	10.3448
DvSAG_27_A8	Ga0209756_1000846	1	81.77	96.1603	29	3.44828
DvSAG_27_A8	Ga0209756_1001090	2	95.865	100	29	6.89655
DvSAG_27_A8	Ga0209756_1001149	3	94.37	100	29	10.3448
DvSAG_27_A8	Ga0209756_1001221	3	89.73	98.5395	29	10.3448
DvSAG_27_A8	Ga0209756_1001353	1	94.08	100	29	3.44828
DvSAG_27_A8	Ga0209756_1001525	1	83.33	97.2973	29	3.44828
DvSAG_27_A8	Ga0209756_1001550	2	95.45	100	29	6.89655
DvSAG_27_A8	Ga0209756_1001571	6	94.9317	99.5749	29	20.6897
DvSAG_27_A8	Ga0209756_1001602	1	95.12	97.619	29	3.44828
DvSAG_27_A8	Ga0209756_1001614	2	92.345	100	29	6.89655
DvSAG_27_A8	Ga0209756_1001681	1	83.14	100	29	3.44828
DvSAG_27_A8	Ga0209756_1001770	2	91.515	100.126	29	6.89655
DvSAG_27_A8	Ga0209756_1001777	1	88.33	100	29	3.44828
DvSAG_27_A8	Ga0209756_1002033	1	81.97	100	29	3.44828
DvSAG_27_A8	Ga0209756_1002040	1	96.61	96.7213	29	3.44828
DvSAG_27_A8	Ga0209756_1002063	1	82.64	99.3103	29	3.44828
DvSAG_27_A8	Ga0209756_1002128	1	81.67	100	29	3.44828
DvSAG_27_A8	Ga0209756_1002156	1	85.42	98.9691	29	3.44828
DvSAG_27_A8	Ga0209756_1002426	1	85	96.7742	29	3.44828
DvSAG_27_A8	Ga0209756_1002504	1	83.62	100	29	3.44828
DvSAG_27_A8	Ga0209756_1002607	5	86.13	99.1354	29	17.2414
DvSAG_27_A8	Ga0209756_1002633	5	88.14	99.5474	29	17.2414
DvSAG_27_A8	Ga0209756_1002667	1	80	100	29	3.44828
DvSAG_27_A8	Ga0209756_1002809	2	87.57	98.7261	29	6.89655
DvSAG_27_A8	Ga0209756_1002815	2	92.19	99.7175	29	6.89655
DvSAG_27_A8	Ga0209756_1002819	12	100	99.2717	29	41.3793
DvSAG_27_A8	Ga0209756_1002823	2	90.475	98.8962	29	6.89655
DvSAG_27_A8	Ga0209756_1002863	2	85.27	99.6063	29	6.89655
DvSAG_27_A8	Ga0209756_1003064	6	90.3617	99.5134	29	20.6897
DvSAG_27_A8	Ga0209756_1003087	3	92.5433	100	29	10.3448
DvSAG_27_A8	Ga0209756_1003123	1	93.37	100	29	3.44828
DvSAG_27_A8	Ga0209756_1003178	3	88.4433	100	29	10.3448
DvSAG_27_A8	Ga0209756_1003180	2	82.695	100	29	6.89655
DvSAG_27_A8	Ga0209756_1003352	1	89.92	100	29	3.44828
DvSAG_27_A8	Ga0209756_1003358	2	90.875	96.4813	29	6.89655
DvSAG_27_A8	Ga0209756_1003363	1	82.13	98.7395	29	3.44828
DvSAG_27_A8	Ga0209756_1003370	1	80.7	93.4426	29	3.44828
DvSAG_27_A8	Ga0209756_1003379	11	100	100	29	37.931
DvSAG_27_A8	Ga0209756_1003478	1	80.65	97.6378	29	3.44828
DvSAG_27_A8	Ga0209756_1003479	1	81.01	98.75	29	3.44828
DvSAG_27_A8	Ga0209756_1003718	1	80.47	100	29	3.44828
DvSAG_27_A8	Ga0209756_1003725	1	93.51	100	29	3.44828
DvSAG_27_A8	Ga0209756_1003766	1	82.76	99.5098	29	3.44828
DvSAG_27_A8	Ga0209756_1003853	5	90.146	99.7419	29	17.2414
DvSAG_27_A8	Ga0209756_1003863	1	84.75	96.7213	29	3.44828
DvSAG_27_A8	Ga0209756_1003916	2	90.915	100.13	29	6.89655
DvSAG_27_A8	Ga0209756_1003973	1	81.52	97.8723	29	3.44828
DvSAG_27_A8	Ga0209756_1003986	2	82.13	100	29	6.89655
DvSAG_27_A8	Ga0209756_1004073	2	83.385	96.203	29	6.89655
DvSAG_27_A8	Ga0209756_1004143	1	93.88	96.0784	29	3.44828
DvSAG_27_A8	Ga0209756_1004432	2	97.1	100	29	6.89655
DvSAG_27_A8	Ga0209756_1004486	1	88.95	100	29	3.44828
DvSAG_27_A8	Ga0209756_1004490	1	88.89	100	29	3.44828
DvSAG_27_A8	Ga0209756_1004504	3	89.6133	99.3248	29	10.3448
DvSAG_27_A8	Ga0209756_1004513	2	83.575	100	29	6.89655
DvSAG_27_A8	Ga0209756_1004565	2	92.83	99.7175	29	6.89655
DvSAG_27_A8	Ga0209756_1004568	2	91.98	100	29	6.89655
DvSAG_27_A8	Ga0209756_1004708	1	88.89	100	29	3.44828
DvSAG_27_A8	Ga0209756_1004783	4	89.7225	98.818	29	13.7931
DvSAG_27_A8	Ga0209756_1004848	1	81.05	95.625	29	3.44828
DvSAG_27_A8	Ga0209756_1005039	1	85.71	100	29	3.44828
DvSAG_27_A8	Ga0209756_1005432	2	93.115	99.7175	29	6.89655
DvSAG_27_A8	Ga0209756_1005500	3	89.3	99.2754	29	10.3448
DvSAG_27_A8	Ga0209756_1005581	2	84.355	97.4365	29	6.89655
DvSAG_27_A8	Ga0209756_1005690	1	84.27	97.8022	29	3.44828
DvSAG_27_A8	Ga0209756_1005813	1	86	98.0392	29	3.44828
DvSAG_27_A8	Ga0209756_1006178	5	87.258	99.4748	29	17.2414
DvSAG_27_A8	Ga0209756_1006333	1	80.95	91.3043	29	3.44828
DvSAG_27_A8	Ga0209756_1006364	1	87.5	100	29	3.44828
DvSAG_27_A8	Ga0209756_1006438	1	82.43	100	29	3.44828
DvSAG_27_A8	Ga0209756_1006452	4	85.5025	96.4195	29	13.7931
DvSAG_27_A8	Ga0209756_1006828	4	88.3675	99.4565	29	13.7931
DvSAG_27_A8	Ga0209756_1006981	3	86.5667	98.9071	29	10.3448
DvSAG_27_A8	Ga0209756_1007363	1	89.62	99.0654	29	3.44828
DvSAG_27_A8	Ga0209756_1007577	1	86.6	100	29	3.44828
DvSAG_27_A8	Ga0209756_1008185	3	88.2933	98.4292	29	10.3448
DvSAG_27_A8	Ga0209756_1008340	1	88.97	100	29	3.44828
DvSAG_27_A8	Ga0209756_1008533	4	89.14	99.6377	29	13.7931
DvSAG_27_A8	Ga0209756_1008607	1	82.02	100	29	3.44828
DvSAG_27_A8	Ga0209756_1008781	4	90.3375	99.6377	29	13.7931
DvSAG_27_A8	Ga0209756_1008852	1	83.13	98.8095	29	3.44828
DvSAG_27_A8	Ga0209756_1009223	2	83.8	99.6094	29	6.89655
DvSAG_27_A8	Ga0209756_1009429	1	80.8	98.4252	29	3.44828
DvSAG_27_A8	Ga0209756_1009543	4	92.4375	100	29	13.7931
DvSAG_27_A8	Ga0209756_1009548	1	80	94.5946	29	3.44828
DvSAG_27_A8	Ga0209756_1009604	2	88.755	98.8709	29	6.89655
DvSAG_27_A8	Ga0209756_1009630	3	90.3267	98.2458	29	10.3448
DvSAG_27_A8	Ga0209756_1009731	1	84.72	100.439	29	3.44828
DvSAG_27_A8	Ga0209756_1010428	5	90.008	98.6547	29	17.2414
DvSAG_27_A8	Ga0209756_1010714	3	86.27	98.9071	29	10.3448
DvSAG_27_A8	Ga0209756_1010782	1	81.01	98.75	29	3.44828
DvSAG_27_A8	Ga0209756_1011772	3	87.4733	98.5507	29	10.3448
DvSAG_27_A8	Ga0209756_1011785	1	80.46	98.8636	29	3.44828
DvSAG_27_A8	Ga0209756_1011791	4	95.3125	100	29	13.7931
DvSAG_27_A8	Ga0209756_1012294	4	91.2	99.2742	29	13.7931
DvSAG_27_A8	Ga0209756_1012397	2	88.745	99.3589	29	6.89655
DvSAG_27_A8	Ga0209756_1012624	5	86.052	98.2852	29	17.2414
DvSAG_27_A8	Ga0209756_1013126	1	83.51	98.9796	29	3.44828
DvSAG_27_A8	Ga0209756_1014032	3	90.8933	100	29	10.3448
DvSAG_27_A8	Ga0211476_10005963	1	89.09	100	29	3.44828
DvSAG_27_A8	Ga0211506_1000267	2	84.285	96.9399	29	6.89655
DvSAG_27_A8	Ga0211521_10005119	1	83.9	99.1597	29	3.44828
DvSAG_27_A8	Ga0211527_10003481	1	81.07	98.8304	29	3.44828
DvSAG_27_A8	Ga0211617_10006147	1	88.89	98.7805	29	3.44828
DvSAG_27_A8	Ga0211622_10006486	1	83.87	93.9394	29	3.44828
DvSAG_27_A8	Ga0211625_10000052	3	91.6833	100	29	10.3448
DvSAG_27_A8	Ga0211625_10009381	2	84.785	100	29	6.89655
DvSAG_27_A8	Ga0211636_10002507	1	84.62	99.3056	29	3.44828
DvSAG_27_A8	Ga0211641_10001550	1	87.8	100	29	3.44828
DvSAG_27_A8	Ga0211641_10006913	1	82.61	99.1379	29	3.44828
DvSAG_27_A8	Ga0211647_10007206	1	91.38	100	29	3.44828
DvSAG_27_A8	Ga0211666_10003917	1	81.03	90.625	29	3.44828
DvSAG_27_A8	Ga0211680_10003706	1	82.09	100	29	3.44828
DvSAG_27_A8	Ga0222713_10002242	1	82.18	100	29	3.44828
DvSAG_27_A8	Ga0222713_10003058	1	83.87	97.6378	29	3.44828
DvSAG_27_A8	Ga0222713_10020276	1	85.16	99.4536	29	3.44828
DvSAG_27_A8	Ga0222714_10015919	1	85.26	98.7342	29	3.44828
DvSAG_27_A8	Ga0224906_1001344	1	83.33	100	29	3.44828
DvSAG_27_A8	Ga0224906_1003337	1	81.36	92.1875	29	3.44828
DvSAG_27_A8	Ga0233411_10000166	1	89.22	100	29	3.44828
DvSAG_27_A8	Ga0233413_10002349	1	92.31	100	29	3.44828
DvSAG_27_A8	Ga0233429_1006903	1	81.97	100	29	3.44828
DvSAG_27_A8	Ga0233429_1012751	2	86.505	99.2754	29	6.89655
DvSAG_27_A8	Ga0233431_1003735	1	84.77	100	29	3.44828
DvSAG_27_A8	Ga0233431_1005074	1	81.97	100	29	3.44828
DvSAG_27_A8	Ga0233431_1006459	4	91.02	99.6377	29	13.7931
DvSAG_27_A8	Ga0233432_10013572	1	85.66	100.487	29	3.44828
DvSAG_27_A8	Ga0233435_1001569	1	89.58	100	29	3.44828
DvSAG_27_A8	Ga0233436_1000478	1	89.58	100	29	3.44828
DvSAG_27_A8	Ga0233437_1003322	2	81.14	100	29	6.89655
DvSAG_27_A8	Ga0233437_1005240	4	91.02	99.6377	29	13.7931
DvSAG_27_A8	Ga0233438_10014528	1	85.9	100.287	29	3.44828
DvSAG_27_A8	Ga0233439_10002063	1	81.07	98.8304	29	3.44828
DvSAG_27_A8	Ga0233439_10004901	1	80.56	97.2973	29	3.44828
DvSAG_27_A8	Ga0233440_1002174	2	88.45	100	29	6.89655
DvSAG_27_A8	Ga0255047_10011089	3	96.87	100	29	10.3448
DvSAG_27_A8	Ga0255751_10004373	1	88.07	99.0909	29	3.44828
DvSAG_27_A8	Ga0255759_10013966	1	87.78	97.8261	29	3.44828
DvSAG_27_A8	Ga0255766_10000159	1	85.29	100	29	3.44828
DvSAG_27_A8	Ga0256380_1000260	3	87.1467	98.1979	29	10.3448
DvSAG_27_A8	Ga0257121_1008495	1	87.22	99.4475	29	3.44828
DvSAG_27_A8	Ga0257127_1001705	1	81.07	94.4134	29	3.44828
DvSAG_27_A8	Ga0310121_10002405	1	81.8	99.5833	29	3.44828
DvSAG_27_A8	Ga0310140_0022517	1	83.72	100	29	3.44828
DvSAG_27_A8	Ga0310345_10006305	1	86.6	98.9796	29	3.44828
DvSAG_27_A8	Ga0310345_10015527	1	88.89	100	29	3.44828
DvSAG_27_A8	Ga0315316_10013784	1	85.37	100	29	3.44828
DvSAG_27_A8	Ga0315321_10006015	1	82.7	93.9086	29	3.44828
DvSAG_27_A8	Ga0315322_10001271	1	81.03	90.625	29	3.44828
DvSAG_27_A8	Ga0315322_10011784	1	83.33	94.7368	29	3.44828
DvSAG_27_A8	Ga0315326_10001548	6	92.2767	99.7699	29	20.6897
DvSAG_27_A8	Ga0315330_10000018	1	81.82	97.9452	29	3.44828
DvSAG_27_A8	Ga0315330_10001686	1	81.07	98.8304	29	3.44828
DvSAG_27_A8	Ga0315330_10002318	1	81.07	98.8304	29	3.44828
DvSAG_27_A8	Ga0315331_10004224	1	82.09	99.2593	29	3.44828
DvSAG_27_A8	Ga0315334_10008956	5	94.724	100.052	29	17.2414
DvSAG_27_A8	Ga0315334_10012221	4	87.6675	98.3333	29	13.7931
DvSAG_27_A8	Ga0315338_1003200	1	82.52	99.7143	29	3.44828
DvSAG_27_A8	Ga0315338_1003270	1	85.96	100	29	3.44828
DvSAG_27_A8	GBIDBA_10005522	1	85.32	99.0909	29	3.44828
DvSAG_27_A8	GBIDBA_10015954	1	84.53	95.3552	29	3.44828
DvSAG_27_A8	GOS2236_1051848	1	80.63	99.3007	29	3.44828
DvSAG_27_A8	GOScombined01_102425909	1	80.63	99.3007	29	3.44828
DvSAG_27_A8	GOScombined01_107002208	1	80.63	99.3007	29	3.44828
DvSAG_27_A8	JGI20151J14362_10004815	2	88.68	99.7126	29	6.89655
DvSAG_27_A8	JGI20151J14362_10006457	1	84.04	100.59	29	3.44828
DvSAG_27_A8	JGI20160J14292_10006642	1	80	97.2222	29	3.44828
DvSAG_27_A8	JGI24004J15324_10000152	1	82.76	93.5484	29	3.44828
DvSAG_27_A8	JGI24004J15324_10000884	1	81.25	97.9592	29	3.44828
DvSAG_27_A8	JGI25127J35165_1000692	1	83.02	99.0654	29	3.44828
DvSAG_27_A8	JGI25129J35166_1000044	5	91.052	100.409	29	17.2414
DvSAG_27_A8	JGI25129J35166_1000538	1	88.41	100	29	3.44828
DvSAG_27_A8	JGI25129J35166_1000592	2	88.8	99.0384	29	6.89655
DvSAG_27_A8	JGI25129J35166_1000624	6	99.9817	98.5448	29	20.6897
DvSAG_27_A8	JGI25129J35166_1000877	10	100	100	29	34.4828
DvSAG_27_A8	JGI25129J35166_1000955	3	94.1967	100	29	10.3448
DvSAG_27_A8	JGI25129J35166_1001223	5	89.074	99.3931	29	17.2414
DvSAG_27_A8	JGI25129J35166_1001288	1	80.33	98.3871	29	3.44828
DvSAG_27_A8	JGI25129J35166_1001361	1	80.65	96.875	29	3.44828
DvSAG_27_A8	JGI25129J35166_1001651	2	88.82	95.5555	29	6.89655
DvSAG_27_A8	JGI25129J35166_1001967	2	91.61	100	29	6.89655
DvSAG_27_A8	JGI25129J35166_1002042	3	86.2133	98.3871	29	10.3448
DvSAG_27_A8	JGI25129J35166_1002671	10	99.976	100	29	34.4828
DvSAG_27_A8	JGI25130J35507_1000040	1	86.26	100	29	3.44828
DvSAG_27_A8	JGI25130J35507_1000078	5	91.052	100.409	29	17.2414
DvSAG_27_A8	JGI25130J35507_1000160	1	82.86	100	29	3.44828
DvSAG_27_A8	JGI25130J35507_1000189	2	90.655	100.383	29	6.89655
DvSAG_27_A8	JGI25130J35507_1000234	2	87.305	97.9278	29	6.89655
DvSAG_27_A8	JGI25130J35507_1000276	2	93.21	99.4382	29	6.89655
DvSAG_27_A8	JGI25130J35507_1000344	2	94.425	100	29	6.89655
DvSAG_27_A8	JGI25130J35507_1000395	3	88.1833	97.8512	29	10.3448
DvSAG_27_A8	JGI25130J35507_1000494	4	85.8575	97.2191	29	13.7931
DvSAG_27_A8	JGI25130J35507_1000872	1	81.38	100	29	3.44828
DvSAG_27_A8	JGI25130J35507_1000884	2	93.655	99.4382	29	6.89655
DvSAG_27_A8	JGI25130J35507_1000907	1	83.72	100	29	3.44828
DvSAG_27_A8	JGI25130J35507_1001022	2	86.16	94.2228	29	6.89655
DvSAG_27_A8	JGI25130J35507_1001207	4	84.9975	95.5502	29	13.7931
DvSAG_27_A8	JGI25130J35507_1001209	1	88.5	98.2609	29	3.44828
DvSAG_27_A8	JGI25130J35507_1001286	2	83.345	97.5806	29	6.89655
DvSAG_27_A8	JGI25130J35507_1001301	2	95.37	100	29	6.89655
DvSAG_27_A8	JGI25130J35507_1001381	2	87.53	98.1012	29	6.89655
DvSAG_27_A8	JGI25130J35507_1001439	3	87.8267	100.548	29	10.3448
DvSAG_27_A8	JGI25130J35507_1001461	1	83.61	98.3871	29	3.44828
DvSAG_27_A8	JGI25130J35507_1001539	2	88.82	95.5555	29	6.89655
DvSAG_27_A8	JGI25130J35507_1001632	1	85.54	100	29	3.44828
DvSAG_27_A8	JGI25130J35507_1001702	1	81.6	98.4252	29	3.44828
DvSAG_27_A8	JGI25130J35507_1001836	4	88.2625	98.6668	29	13.7931
DvSAG_27_A8	JGI25130J35507_1002131	4	85.6925	97.9346	29	13.7931
DvSAG_27_A8	JGI25130J35507_1002490	5	90.188	99.0089	29	17.2414
DvSAG_27_A8	JGI25130J35507_1002585	4	87.385	97.5323	29	13.7931
DvSAG_27_A8	JGI25132J35274_1001044	1	84.08	98.7421	29	3.44828
DvSAG_27_A8	JGI25133J35611_10000085	5	91.052	100.409	29	17.2414
DvSAG_27_A8	JGI25133J35611_10000102	1	80.04	100	29	3.44828
DvSAG_27_A8	JGI25133J35611_10000137	2	93.14	99.4382	29	6.89655
DvSAG_27_A8	JGI25133J35611_10000157	2	96.54	100	29	6.89655
DvSAG_27_A8	JGI25133J35611_10000190	1	88.14	96.7213	29	3.44828
DvSAG_27_A8	JGI25133J35611_10000305	1	81.82	100	29	3.44828
DvSAG_27_A8	JGI25133J35611_10000306	1	94.16	100	29	3.44828
DvSAG_27_A8	JGI25133J35611_10000314	1	84.44	100	29	3.44828
DvSAG_27_A8	JGI25133J35611_10000318	1	93.97	100	29	3.44828
DvSAG_27_A8	JGI25133J35611_10000367	1	85.81	100	29	3.44828
DvSAG_27_A8	JGI25133J35611_10000644	5	89.452	99.2367	29	17.2414
DvSAG_27_A8	JGI25133J35611_10000661	1	85.71	100	29	3.44828
DvSAG_27_A8	JGI25133J35611_10001191	1	86.67	100	29	3.44828
DvSAG_27_A8	JGI25133J35611_10001255	6	90.4133	99.2481	29	20.6897
DvSAG_27_A8	JGI25133J35611_10001410	2	81.855	95.6938	29	6.89655
DvSAG_27_A8	JGI25133J35611_10001444	1	90.91	100	29	3.44828
DvSAG_27_A8	JGI25133J35611_10001458	1	83.54	94.0476	29	3.44828
DvSAG_27_A8	JGI25133J35611_10001477	1	92.59	100	29	3.44828
DvSAG_27_A8	JGI25133J35611_10001557	2	91.54	100.126	29	6.89655
DvSAG_27_A8	JGI25133J35611_10001653	1	89.29	100	29	3.44828
DvSAG_27_A8	JGI25133J35611_10001741	1	92.63	96.9388	29	3.44828
DvSAG_27_A8	JGI25133J35611_10001742	2	91.56	99.4382	29	6.89655
DvSAG_27_A8	JGI25133J35611_10001796	2	88.375	96.2013	29	6.89655
DvSAG_27_A8	JGI25133J35611_10001873	1	80.28	97.2603	29	3.44828
DvSAG_27_A8	JGI25133J35611_10001965	5	94.438	98.9936	29	17.2414
DvSAG_27_A8	JGI25133J35611_10002436	1	80.33	98.3871	29	3.44828
DvSAG_27_A8	JGI25133J35611_10002648	3	87.5833	97.6677	29	10.3448
DvSAG_27_A8	JGI25133J35611_10002805	4	99.9725	97.8173	29	13.7931
DvSAG_27_A8	JGI25133J35611_10003063	8	99.9275	100	29	27.5862
DvSAG_27_A8	JGI25133J35611_10003283	4	85.5475	98.027	29	13.7931
DvSAG_27_A8	JGI25133J35611_10003458	2	86.1	100	29	6.89655
DvSAG_27_A8	JGI25133J35611_10004078	1	88.19	100	29	3.44828
DvSAG_27_A8	JGI25133J35611_10004138	1	83.33	97.2973	29	3.44828
DvSAG_27_A8	JGI25133J35611_10004169	2	88.82	95.5555	29	6.89655
DvSAG_27_A8	JGI25133J35611_10004837	1	82.11	94.6154	29	3.44828
DvSAG_27_A8	JGI25133J35611_10004866	1	83.67	98.9899	29	3.44828
DvSAG_27_A8	JGI25133J35611_10004987	2	86.195	94.1936	29	6.89655
DvSAG_27_A8	JGI25133J35611_10005136	3	90.2633	97.4925	29	10.3448
DvSAG_27_A8	JGI25133J35611_10005140	1	81.94	100	29	3.44828
DvSAG_27_A8	JGI25133J35611_10005380	1	81.82	97.4684	29	3.44828
DvSAG_27_A8	JGI25133J35611_10005551	1	89.09	100	29	3.44828
DvSAG_27_A8	JGI25133J35611_10005690	1	83.87	96.875	29	3.44828
DvSAG_27_A8	JGI25133J35611_10005944	3	85.88	98.3871	29	10.3448
DvSAG_27_A8	JGI25134J35505_10000059	5	91.052	100.409	29	17.2414
DvSAG_27_A8	JGI25134J35505_10000123	1	88.14	96.7213	29	3.44828
DvSAG_27_A8	JGI25134J35505_10000183	2	88.375	96.2013	29	6.89655
DvSAG_27_A8	JGI25134J35505_10000225	2	92.175	100	29	6.89655
DvSAG_27_A8	JGI25134J35505_10000390	1	81.97	98.3871	29	3.44828
DvSAG_27_A8	JGI25134J35505_10000507	1	85.81	100	29	3.44828
DvSAG_27_A8	JGI25134J35505_10000550	1	97.92	100	29	3.44828
DvSAG_27_A8	JGI25134J35505_10000591	3	90.52	97.4925	29	10.3448
DvSAG_27_A8	JGI25134J35505_10000728	1	82.19	100	29	3.44828
DvSAG_27_A8	JGI25134J35505_10000737	1	92.39	100	29	3.44828
DvSAG_27_A8	JGI25134J35505_10000762	1	89.72	100	29	3.44828
DvSAG_27_A8	JGI25134J35505_10000822	1	93.82	100	29	3.44828
DvSAG_27_A8	JGI25134J35505_10000900	1	85.71	96.0784	29	3.44828
DvSAG_27_A8	JGI25134J35505_10000905	2	93.14	99.4382	29	6.89655
DvSAG_27_A8	JGI25134J35505_10001001	5	94.508	99.2152	29	17.2414
DvSAG_27_A8	JGI25134J35505_10001011	4	99.89	97.8173	29	13.7931
DvSAG_27_A8	JGI25134J35505_10001159	6	92.9417	98.2497	29	20.6897
DvSAG_27_A8	JGI25134J35505_10001182	1	86.21	100	29	3.44828
DvSAG_27_A8	JGI25134J35505_10001428	1	80.78	98.5294	29	3.44828
DvSAG_27_A8	JGI25134J35505_10001665	8	100	100	29	27.5862
DvSAG_27_A8	JGI25134J35505_10001721	1	80.33	98.3871	29	3.44828
DvSAG_27_A8	JGI25134J35505_10001785	5	89.452	99.2367	29	17.2414
DvSAG_27_A8	JGI25134J35505_10001937	2	88.94	100	29	6.89655
DvSAG_27_A8	JGI25134J35505_10002264	1	80.65	96.875	29	3.44828
DvSAG_27_A8	JGI25134J35505_10002750	1	80.28	97.2603	29	3.44828
DvSAG_27_A8	JGI25134J35505_10002790	1	82.61	100	29	3.44828
DvSAG_27_A8	JGI25134J35505_10002958	2	86.1	100	29	6.89655
DvSAG_27_A8	JGI25134J35505_10003276	4	85.54	95.7455	29	13.7931
DvSAG_27_A8	JGI25134J35505_10003520	1	80.18	100	29	3.44828
DvSAG_27_A8	JGI25134J35505_10003572	4	89.44	98.5177	29	13.7931
DvSAG_27_A8	JGI25134J35505_10003574	4	87.14	97.5323	29	13.7931
DvSAG_27_A8	JGI25134J35505_10003715	1	91.91	100	29	3.44828
DvSAG_27_A8	JGI25134J35505_10003765	1	80.72	100	29	3.44828
DvSAG_27_A8	JGI25134J35505_10003919	3	85.88	98.3871	29	10.3448
DvSAG_27_A8	JGI25134J35505_10004691	2	83.18	99.1804	29	6.89655
DvSAG_27_A8	JGI26118J46590_1000749	1	80.36	91.8033	29	3.44828
DvSAG_27_A8	JGI26238J51125_1001603	1	81.77	99.4915	29	3.44828
DvSAG_27_A8	JGI26380J51729_10002822	1	81.77	99.6604	29	3.44828
DvSAG_27_A8	JGI26381J51731_1001468	1	86.54	96.2963	29	3.44828
DvSAG_27_A8	KiloMoana_10002785	1	87.18	100	29	3.44828
DvSAG_27_A8	KiloMoana_10002795	4	85.4225	97.3223	29	13.7931
DvSAG_27_A8	KiloMoana_10003528	3	85.6967	98.4367	29	10.3448
DvSAG_27_A8	KVRMV2_100000595	1	80	93.0233	29	3.44828
DvSAG_27_A8	KVRMV2_100026022	2	85.095	96.135	29	6.89655
DvSAG_27_A8	KVWGV2_10026287	2	85.095	96.135	29	6.89655
DvSAG_27_A8	PicMicro_10029918	1	90.37	95.8974	29	3.44828
DvSAG_27_A8	PicViral_1000056	1	80.33	98.3871	29	3.44828
DvSAG_27_A8	PicViral_1000135	5	90.26	99.376	29	17.2414
DvSAG_27_A8	PicViral_1000147	6	88.7833	99.7312	29	20.6897
DvSAG_27_A8	PicViral_1000199	1	84.54	94.1176	29	3.44828
DvSAG_27_A8	PicViral_1000223	2	80.31	96.5117	29	6.89655
DvSAG_27_A8	PicViral_1000309	1	87.91	100	29	3.44828
DvSAG_27_A8	PicViral_1000350	5	92.238	97.8627	29	17.2414
DvSAG_27_A8	PicViral_1000396	1	86.67	98.8024	29	3.44828
DvSAG_27_A8	PicViral_1000445	7	90.33	97.986	29	24.1379
DvSAG_27_A8	PicViral_1000468	1	81.54	99.2366	29	3.44828
DvSAG_27_A8	PicViral_1000939	4	89.145	99.2217	29	13.7931
DvSAG_27_A8	PicViral_1001084	2	83.79	96.6046	29	6.89655
DvSAG_27_A8	PicViral_1001630	1	84.21	97.7941	29	3.44828
DvSAG_27_A8	PicViral_1001903	1	91.92	98.0198	29	3.44828
DvSAG_27_A8	PicViral_1002227	3	87.9933	99.4624	29	10.3448
DvSAG_27_A8	SI34jun09_200mDRAFT_c1001815	1	92.59	100	29	3.44828
DvSAG_27_A8	SI39nov09_100mDRAFT_1000178	1	96.15	100	29	3.44828
DvSAG_27_A8	SI39nov09_120mDRAFT_c1000624	1	91.3	97.8723	29	3.44828
DvSAG_27_A8	SI39nov09_135mDRAFT_c1001413	1	81.77	99.4915	29	3.44828
DvSAG_27_A8	Station111_MES_COMBINED_FINAL_NODE_1084_length_33194_cov_21,969703	1	81.03	95.082	29	3.44828
DvSAG_27_A8	Station111_MES_DO_NOT_POOL_NODE_1144_length_33271_cov_21,855100	1	81.03	95.082	29	3.44828
DvSAG_27_A8	Station122_DCM_ALL_assembly_NODE_5_length_178986_cov_68,467437	6	85.7033	98.8182	29	20.6897
DvSAG_27_A8	Station122_SUR_ALL_assembly_NODE_89_length_72085_cov_4,876204	3	89.0733	99.6169	29	10.3448
DvSAG_27_A8	Station123_MXL_ALL_assembly_NODE_9_length_118427_cov_9,948848_1	6	85.7033	98.8979	29	20.6897
DvSAG_27_A8	Station124_MXL_ALL_assembly_NODE_3_length_184220_cov_23,514403	3	91.71	100	29	10.3448
DvSAG_27_A8	Station124_MXL_ALL_assembly_NODE_8_length_145096_cov_22,809723_1	6	85.7033	98.8182	29	20.6897
DvSAG_27_A8	Station125_MXL_ALL_assembly_NODE_1286_length_21682_cov_3,871226	2	92.48	99.4382	29	6.89655
DvSAG_27_A8	Station125_MXL_ALL_assembly_NODE_14_length_174504_cov_6,101101_1	1	95	98.3607	29	3.44828
DvSAG_27_A8	Station125_MXL_ALL_assembly_NODE_17_length_165809_cov_20,135345	1	82.76	93.5484	29	3.44828
DvSAG_27_A8	Station125_MXL_ALL_assembly_NODE_50_length_88917_cov_19,599356	2	93.76	100	29	6.89655
DvSAG_27_A8	Station125_MXL_ALL_assembly_NODE_60_length_82911_cov_13,558728	1	95.19	100	29	3.44828
DvSAG_27_A8	Station125_MXL_ALL_assembly_NODE_71_length_72381_cov_6,605923	3	89.0733	99.6169	29	10.3448
DvSAG_27_A8	Station155_DCM_ALL_assembly_NODE_444_length_89416_cov_45,650138	4	89.7125	98.4436	29	13.7931
DvSAG_27_A8	Station155_MES_ALL_assembly_NODE_455_length_105482_cov_4,627316	2	85.785	99.1936	29	6.89655
DvSAG_27_A8	Station155_MES_ALL_assembly_NODE_868_length_63850_cov_10,035692	2	95.105	96.8421	29	6.89655
DvSAG_27_A8	Station173_DCM_ALL_assembly_NODE_321_length_138266_cov_16,655114	1	81.03	93.5484	29	3.44828
DvSAG_27_A8	Station175_SUR_ALL_assembly_NODE_1626_length_43163_cov_25,448594	2	94.445	100	29	6.89655
DvSAG_27_A8	Station175_SUR_ALL_assembly_NODE_588_length_79821_cov_18,159905	2	85.27	98.5742	29	6.89655
DvSAG_27_A8	Station18_DCM_ALL_assembly_NODE_41_length_76691_cov_69,442416	7	85.8271	97.9179	29	24.1379
DvSAG_27_A8	Station189_MES_ALL_assembly_NODE_108_length_123609_cov_6,093376	1	91.53	95.1613	29	3.44828
DvSAG_27_A8	Station189_MES_ALL_assembly_NODE_177_length_94643_cov_8,309046	1	81.03	93.5484	29	3.44828
DvSAG_27_A8	Station189_MES_ALL_assembly_NODE_222_length_83536_cov_32,353374	2	96.67	100	29	6.89655
DvSAG_27_A8	Station193_SUR_ALL_assembly_NODE_85_length_184545_cov_7,093474	7	88.2771	98.5741	29	24.1379
DvSAG_27_A8	Station206_SUR_ALL_assembly_NODE_246_length_91889_cov_4,117092	6	93.6583	99.7312	29	20.6897
DvSAG_27_A8	Station210_SUR_ALL_assembly_NODE_3254_length_30148_cov_4,263948	1	80.33	98.3871	29	3.44828
DvSAG_27_A8	Station32_SUR_ALL_assembly_NODE_1_length_190541_cov_8,685541	1	81.29	96.6102	29	3.44828
DvSAG_27_A8	Station34_DCM_ALL_assembly_NODE_34_length_91363_cov_15,079489	4	88.0075	98.8774	29	13.7931
DvSAG_27_A8	Station42_DCM_ALL_assembly_NODE_327_length_34398_cov_3,833154	1	86.36	100	29	3.44828
DvSAG_27_A8	Station45_SUR_ALL_assembly_NODE_22_length_137377_cov_7,093430	1	81.67	95.7447	29	3.44828
DvSAG_27_A8	Station45_SUR_ALL_assembly_NODE_46_length_79307_cov_4,652337	2	91.4	99.4253	29	6.89655
DvSAG_27_A8	Station68_MES_COMBINED_FINAL_NODE_257_length_95952_cov_16,940520	1	95.19	100	29	3.44828
DvSAG_27_A8	Station72_DCM_ALL_assembly_NODE_20_length_90816_cov_8,777184	1	85.85	98.1481	29	3.44828
DvSAG_27_A8	Station72_DCM_ALL_assembly_NODE_7_length_138316_cov_9,370423	11	89.4627	99.674	29	37.931
DvSAG_27_A8	Station76_MES_COMBINED_FINAL_NODE_1007_length_48086_cov_22,159397_1	3	90.5567	100	29	10.3448
DvSAG_27_A8	TahiMoana_1003139	4	84.5875	97.0571	29	13.7931
DvSAG_27_A8	TahiMoana_1007194	3	85.7067	98.2831	29	10.3448
DvSAG_27_C3	Ga0114996_10004124	3	91.0933	100	35	8.57143
DvSAG_27_C3	Ga0115002_10003381	4	88.5725	98.1165	35	11.4286
DvSAG_27_C3	UGV-GENOME-0267208	1	81.08	100	35	2.85714
DvSAG_27_D11	637000063	1	83.61	92.4242	32	3.125
DvSAG_27_D11	647002932	1	80.95	96.9231	32	3.125
DvSAG_27_D11	Abe_10003368	2	83.565	96.6031	32	6.25
DvSAG_27_D11	Abe_10003702	2	83.925	98.6068	32	6.25
DvSAG_27_D11	B570J13894_1000232	1	80.72	90.9589	32	3.125
DvSAG_27_D11	B570J13895_1000001	1	80.54	94.3503	32	3.125
DvSAG_27_D11	B570J14230_10000002	1	80.54	94.3503	32	3.125
DvSAG_27_D11	B570J14230_10002651	1	80.72	90.9589	32	3.125
DvSAG_27_D11	B570J14554_10000002	1	80.54	94.3503	32	3.125
DvSAG_27_D11	B570J14554_10002651	1	80.72	90.9589	32	3.125
DvSAG_27_D11	B570J29032_109956455	1	82.99	95.7143	32	3.125
DvSAG_27_D11	B570J29618_1000070	1	82.99	93.0556	32	3.125
DvSAG_27_D11	B570J29624_100025	1	84.98	92.2438	32	3.125
DvSAG_27_D11	B570J29624_100137	1	84.21	91.9355	32	3.125
DvSAG_27_D11	B570J40625_100000510	1	80.37	97.7679	32	3.125
DvSAG_27_D11	B570J40625_100000593	1	80	95.8606	32	3.125
DvSAG_27_D11	B570J40625_100000790	1	80.78	94.3343	32	3.125
DvSAG_27_D11	B570J40625_100001926	1	80.95	94.9153	32	3.125
DvSAG_27_D11	B570J40625_100003729	1	84.98	92.2438	32	3.125
DvSAG_27_D11	B570J40625_100004240	1	80.95	94.1176	32	3.125
DvSAG_27_D11	B570J40625_100005598	1	82.39	94.9008	32	3.125
DvSAG_27_D11	B570J40625_100007506	1	82.09	94.6328	32	3.125
DvSAG_27_D11	B570J40625_100007927	1	82.14	95.1841	32	3.125
DvSAG_27_D11	B570J40625_100009965	2	81.45	94.0481	32	6.25
DvSAG_27_D11	B570J40625_100010094	1	81.49	96.8208	32	3.125
DvSAG_27_D11	B570J40625_100014368	1	82.39	94.6328	32	3.125
DvSAG_27_D11	B570J40625_100015534	1	81.88	95.8242	32	3.125
DvSAG_27_D11	B570J40625_100017920	1	80.12	92.8375	32	3.125
DvSAG_27_D11	B570J40625_100020114	1	87.91	90.7173	32	3.125
DvSAG_27_D11	B570J40625_100021057	1	81.01	93.0939	32	3.125
DvSAG_27_D11	B570J40625_100021381	2	81.495	94.5627	32	6.25
DvSAG_27_D11	B570J40625_100024115	1	83.28	92.7978	32	3.125
DvSAG_27_D11	B570J40625_100024395	1	88.69	92.2559	32	3.125
DvSAG_27_D11	B570J40625_100033827	1	83.28	95.7143	32	3.125
DvSAG_27_D11	B570J40625_100039137	1	80.6	94.1011	32	3.125
DvSAG_27_D11	Bacilli_gi_501981456-659288-697870	1	82.26	92.5373	32	3.125
DvSAG_27_D11	BB_Man_B_Liq_inBBDRAFT_1000421	1	80.49	91.1111	32	3.125
DvSAG_27_D11	BBAY92_10000002	1	85.29	95.4155	32	3.125
DvSAG_27_D11	BBAY92_10000019	2	81.385	95.0435	32	6.25
DvSAG_27_D11	BBAY92_10000277	2	83.42	94.3362	32	6.25
DvSAG_27_D11	BBAY93_12102286	2	81.45	94.6457	32	6.25
DvSAG_27_D11	BBAY94_10000094	2	81.385	94.9457	32	6.25
DvSAG_27_D11	BpDRAFT_10001504	1	85.37	95.4416	32	3.125
DvSAG_27_D11	BpDRAFT_10004166	2	82.26	94.7875	32	6.25
DvSAG_27_D11	BpDRAFT_10009898	1	80.52	94.6721	32	3.125
DvSAG_27_D11	BpDRAFT_10102588	1	84.24	100	32	3.125
DvSAG_27_D11	C1189623	1	80	100	32	3.125
DvSAG_27_D11	DelMOSpr2010_c10000071	1	85.25	94.7205	32	3.125
DvSAG_27_D11	DelMOSpr2010_c10000094	1	88.56	95.3271	32	3.125
DvSAG_27_D11	DelMOSpr2010_c10000228	1	87.46	94.1011	32	3.125
DvSAG_27_D11	DelMOSpr2010_c10000385	2	84.215	98.7766	32	6.25
DvSAG_27_D11	DelMOSpr2010_c10000675	2	84.69	98.7766	32	6.25
DvSAG_27_D11	DelMOSpr2010_c10000848	2	84.215	98.7766	32	6.25
DvSAG_27_D11	DelMOSpr2010_c10001996	2	88.09	99.5169	32	6.25
DvSAG_27_D11	DelMOSpr2010_c10003757	1	81.38	95.1429	32	3.125
DvSAG_27_D11	DelMOSpr2010_c10004993	1	80.09	94.7939	32	3.125
DvSAG_27_D11	DelMOSpr2010_c10005388	1	80.68	95.8606	32	3.125
DvSAG_27_D11	DelMOSpr2010_c10005493	1	85.79	100	32	3.125
DvSAG_27_D11	DelMOSum2010_c10000043	1	85.48	91.1765	32	3.125
DvSAG_27_D11	DelMOSum2010_c10000144	2	82.14	94.7875	32	6.25
DvSAG_27_D11	DelMOSum2010_c10000603	1	85.71	92.1053	32	3.125
DvSAG_27_D11	DelMOSum2010_c10000922	1	81.38	95.1429	32	3.125
DvSAG_27_D11	DelMOSum2010_c10001236	1	84.02	102.817	32	3.125
DvSAG_27_D11	DelMOSum2010_c10001732	1	87.83	94.1341	32	3.125
DvSAG_27_D11	DelMOSum2010_c10001896	1	81.25	101.149	32	3.125
DvSAG_27_D11	DelMOSum2010_c10002443	1	84.13	95.1567	32	3.125
DvSAG_27_D11	DelMOSum2010_c10002540	1	84.05	100	32	3.125
DvSAG_27_D11	DelMOSum2010_c10002975	2	81.815	94.1654	32	6.25
DvSAG_27_D11	DelMOSum2010_c10003518	4	85.015	98.7992	32	12.5
DvSAG_27_D11	DelMOSum2010_c10003928	1	84.72	96	32	3.125
DvSAG_27_D11	DelMOSum2010_c10005305	1	82.54	95.4545	32	3.125
DvSAG_27_D11	DelMOSum2010_c10010236	1	84.58	101.522	32	3.125
DvSAG_27_D11	DelMOSum2010_c10013574	1	80	98.2143	32	3.125
DvSAG_27_D11	DelMOSum2011_c10000005	1	82.44	94.382	32	3.125
DvSAG_27_D11	DelMOSum2011_c10000023	1	86.05	96.0114	32	3.125
DvSAG_27_D11	DelMOSum2011_c10000465	2	80.675	97.6819	32	6.25
DvSAG_27_D11	DelMOSum2011_c10000557	1	87.16	94.1011	32	3.125
DvSAG_27_D11	DelMOSum2011_c10001590	1	86.9	95.7265	32	3.125
DvSAG_27_D11	DelMOSum2011_c10001726	1	83.67	100	32	3.125
DvSAG_27_D11	DelMOSum2011_c10003447	1	81.01	91.8256	32	3.125
DvSAG_27_D11	DelMOSum2011_c10003700	1	84.31	100	32	3.125
DvSAG_27_D11	DelMOWin2010_c10000001	1	82.43	97.8836	32	3.125
DvSAG_27_D11	DelMOWin2010_c10000006	1	82.44	94.382	32	3.125
DvSAG_27_D11	DelMOWin2010_c10000008	1	88.36	94.6328	32	3.125
DvSAG_27_D11	DelMOWin2010_c10000017	1	86.05	96.0114	32	3.125
DvSAG_27_D11	DelMOWin2010_c10000021	2	85.19	96.3774	32	6.25
DvSAG_27_D11	DelMOWin2010_c10000048	1	80.2	92.0561	32	3.125
DvSAG_27_D11	DelMOWin2010_c10000059	1	81.38	95.1429	32	3.125
DvSAG_27_D11	DelMOWin2010_c10000173	1	85.33	95.977	32	3.125
DvSAG_27_D11	DelMOWin2010_c10000181	1	85.91	98.2143	32	3.125
DvSAG_27_D11	DelMOWin2010_c10000329	1	88.25	95.1289	32	3.125
DvSAG_27_D11	DelMOWin2010_c10000407	2	85.49	96.6727	32	6.25
DvSAG_27_D11	DelMOWin2010_c10000646	1	80.69	90.625	32	3.125
DvSAG_27_D11	DelMOWin2010_c10000822	1	81.31	93.3518	32	3.125
DvSAG_27_D11	DelMOWin2010_c10000948	1	82.44	95.1841	32	3.125
DvSAG_27_D11	DelMOWin2010_c10001304	1	85.51	103.759	32	3.125
DvSAG_27_D11	DelMOWin2010_c10001647	1	82.81	96.9697	32	3.125
DvSAG_27_D11	DelMOWin2010_c10001815	3	88.8967	97.6896	32	9.375
DvSAG_27_D11	DelMOWin2010_c10002690	1	85.16	96.5616	32	3.125
DvSAG_27_D11	DelMOWin2010_c10003951	1	80	96.0452	32	3.125
DvSAG_27_D11	DelMOWin2010_c10004154	1	85.71	95.7265	32	3.125
DvSAG_27_D11	DelMOWin2010_c10006983	1	82.79	97.1182	32	3.125
DvSAG_27_D11	DelMOWin2010_c10007501	1	85.65	100	32	3.125
DvSAG_27_D11	Draft_10000366	1	80.77	94.9438	32	3.125
DvSAG_27_D11	Draft_10000474	2	81.135	93.8178	32	6.25
DvSAG_27_D11	Draft_10000806	1	82.04	92.5208	32	3.125
DvSAG_27_D11	Draft_10001102	1	80.36	98.2456	32	3.125
DvSAG_27_D11	Draft_10007034	1	82.7	95.2096	32	3.125
DvSAG_27_D11	Draft_10118305	1	82.04	92.5208	32	3.125
DvSAG_27_D11	Draft_10313882	1	82.04	92.5208	32	3.125
DvSAG_27_D11	draft_11522608	2	81.135	93.8178	32	6.25
DvSAG_27_D11	draft_11539568	2	81.135	93.8178	32	6.25
DvSAG_27_D11	DTR_698626	2	81.21	95.7512	32	6.25
DvSAG_27_D11	DTR_699621	1	81.6	94.1341	32	3.125
DvSAG_27_D11	DTR_893586	1	86.94	95.7386	32	3.125
DvSAG_27_D11	FwDRAFT_10002477	1	82.39	94.1011	32	3.125
DvSAG_27_D11	G310J44882_10000601	1	80.18	93.8034	32	3.125
DvSAG_27_D11	G310J44882_10002286	1	80.54	93.0362	32	3.125
DvSAG_27_D11	G310J44882_10002731	1	80.54	93.0362	32	3.125
DvSAG_27_D11	Ga0007787_10001038	1	85.17	100	32	3.125
DvSAG_27_D11	Ga0007791_10001621	1	80	100	32	3.125
DvSAG_27_D11	Ga0007792_10000866	1	80	93.0556	32	3.125
DvSAG_27_D11	Ga0007796_10000439	1	81.74	98.2063	32	3.125
DvSAG_27_D11	Ga0007796_10000542	1	81.4	91.4894	32	3.125
DvSAG_27_D11	Ga0007804_1000270	1	80	93.5754	32	3.125
DvSAG_27_D11	Ga0007805_1000010	1	81.44	92.5208	32	3.125
DvSAG_27_D11	Ga0007805_1000113	1	81.55	93.0748	32	3.125
DvSAG_27_D11	Ga0007805_1000984	1	81.49	93.3148	32	3.125
DvSAG_27_D11	Ga0007806_1000014	1	81.44	92.5208	32	3.125
DvSAG_27_D11	Ga0007806_1000067	1	81.55	93.0748	32	3.125
DvSAG_27_D11	Ga0007806_1000564	1	81.37	103.03	32	3.125
DvSAG_27_D11	Ga0007806_1000899	1	82.39	92.7978	32	3.125
DvSAG_27_D11	Ga0007807_1000001	1	85.06	100	32	3.125
DvSAG_27_D11	Ga0007807_1000014	1	81.44	92.5208	32	3.125
DvSAG_27_D11	Ga0007809_10000184	1	83.28	96.2644	32	3.125
DvSAG_27_D11	Ga0007809_10000249	1	84.19	94.7566	32	3.125
DvSAG_27_D11	Ga0007809_10000297	1	81.49	91.5301	32	3.125
DvSAG_27_D11	Ga0007809_10000636	1	81.85	94.382	32	3.125
DvSAG_27_D11	Ga0007810_1000037	1	81.74	101.944	32	3.125
DvSAG_27_D11	Ga0007810_1000300	1	80.66	95.0156	32	3.125
DvSAG_27_D11	Ga0007813_1000053	1	80.66	95.0156	32	3.125
DvSAG_27_D11	Ga0007813_1000072	1	80.65	96.2751	32	3.125
DvSAG_27_D11	Ga0007813_1001034	1	81.1	94.7761	32	3.125
DvSAG_27_D11	Ga0007813_1001748	1	82.3	101.802	32	3.125
DvSAG_27_D11	Ga0007815_1000790	1	81.33	90.3614	32	3.125
DvSAG_27_D11	Ga0007816_1000404	1	80.42	94.3978	32	3.125
DvSAG_27_D11	Ga0007816_1001104	1	81.79	93.0556	32	3.125
DvSAG_27_D11	Ga0007816_1001743	1	80.95	92.6471	32	3.125
DvSAG_27_D11	Ga0007817_1000078	1	82.99	95.4416	32	3.125
DvSAG_27_D11	Ga0007818_1000072	1	82.99	95.4416	32	3.125
DvSAG_27_D11	Ga0007819_1000039	1	80.66	95.0156	32	3.125
DvSAG_27_D11	Ga0007819_1000048	1	80.42	93.3518	32	3.125
DvSAG_27_D11	Ga0007819_1000249	1	80.65	96.2751	32	3.125
DvSAG_27_D11	Ga0007819_1000793	1	83.9	100	32	3.125
DvSAG_27_D11	Ga0007819_1001677	1	81.6	102.459	32	3.125
DvSAG_27_D11	Ga0007824_1000035	1	80.65	96.2751	32	3.125
DvSAG_27_D11	Ga0007824_1000045	1	80.9	94.1011	32	3.125
DvSAG_27_D11	Ga0007824_1000460	1	81.55	93.0748	32	3.125
DvSAG_27_D11	Ga0007824_1000773	1	80.36	97.3913	32	3.125
DvSAG_27_D11	Ga0007824_1000984	1	80.99	102.542	32	3.125
DvSAG_27_D11	Ga0007827_10000078	1	81.19	95.4048	32	3.125
DvSAG_27_D11	Ga0007828_1000174	1	81.49	93.8375	32	3.125
DvSAG_27_D11	Ga0007828_1000760	1	80.81	103.125	32	3.125
DvSAG_27_D11	Ga0007842_1000161	1	80.36	97.3913	32	3.125
DvSAG_27_D11	Ga0007846_1000052	1	80.65	96.2751	32	3.125
DvSAG_27_D11	Ga0007852_1000093	1	80.9	94.1011	32	3.125
DvSAG_27_D11	Ga0007854_10000015	1	81.49	93.8375	32	3.125
DvSAG_27_D11	Ga0007854_10000333	1	80	93.0556	32	3.125
DvSAG_27_D11	Ga0007854_10001826	2	80.325	94.4901	32	6.25
DvSAG_27_D11	Ga0007857_1000113	1	82.39	97.1014	32	3.125
DvSAG_27_D11	Ga0007857_1000295	1	80.65	96.2751	32	3.125
DvSAG_27_D11	Ga0007859_1000140	1	81.19	95.4048	32	3.125
DvSAG_27_D11	Ga0007862_1000008	1	81.49	93.8375	32	3.125
DvSAG_27_D11	Ga0007862_1000009	1	81.19	93.5754	32	3.125
DvSAG_27_D11	Ga0007862_1000372	1	80.65	96.2751	32	3.125
DvSAG_27_D11	Ga0007862_1001255	1	80.36	97.3913	32	3.125
DvSAG_27_D11	Ga0007863_1000001	1	81.49	93.8375	32	3.125
DvSAG_27_D11	Ga0007863_1000433	1	80.36	97.3913	32	3.125
DvSAG_27_D11	Ga0007866_1000003	1	81.19	95.4048	32	3.125
DvSAG_27_D11	Ga0007867_1000030	1	81.49	93.8375	32	3.125
DvSAG_27_D11	Ga0007867_1001424	1	80.36	97.3913	32	3.125
DvSAG_27_D11	Ga0007869_1000555	1	81.55	93.0748	32	3.125
DvSAG_27_D11	Ga0007871_1000076	1	82.99	95.4416	32	3.125
DvSAG_27_D11	Ga0007875_1000203	1	81.55	93.0748	32	3.125
DvSAG_27_D11	Ga0007876_1000035	1	81.44	92.5208	32	3.125
DvSAG_27_D11	Ga0007876_1000164	1	81.79	93.0556	32	3.125
DvSAG_27_D11	Ga0007881_1000036	1	81.44	92.5208	32	3.125
DvSAG_27_D11	Ga0007881_1000703	1	81.55	93.0748	32	3.125
DvSAG_27_D11	Ga0007881_1002171	1	82.39	92.7978	32	3.125
DvSAG_27_D11	Ga0007882_10000040	1	82.39	92.7978	32	3.125
DvSAG_27_D11	Ga0007882_10002587	1	80.65	96.2751	32	3.125
DvSAG_27_D11	Ga0008649_10004724	2	84.495	98.2875	32	6.25
DvSAG_27_D11	Ga0049080_10000006	1	82.69	94.6328	32	3.125
DvSAG_27_D11	Ga0049080_10000403	1	85.51	99.2806	32	3.125
DvSAG_27_D11	Ga0049080_10000405	1	81.25	93.0748	32	3.125
DvSAG_27_D11	Ga0049080_10000834	1	81.49	93.0556	32	3.125
DvSAG_27_D11	Ga0049080_10001172	1	83.58	93.0556	32	3.125
DvSAG_27_D11	Ga0049080_10001326	1	81.25	94.6479	32	3.125
DvSAG_27_D11	Ga0049080_10001679	1	80.19	100.952	32	3.125
DvSAG_27_D11	Ga0049081_10000053	2	81.965	93.5504	32	6.25
DvSAG_27_D11	Ga0049081_10000066	1	82.81	92.7536	32	3.125
DvSAG_27_D11	Ga0049081_10000155	1	82.09	93.5754	32	3.125
DvSAG_27_D11	Ga0049081_10000296	1	82.34	94.8864	32	3.125
DvSAG_27_D11	Ga0049081_10000975	2	81.345	93.3363	32	6.25
DvSAG_27_D11	Ga0049081_10001775	1	81.85	94.6479	32	3.125
DvSAG_27_D11	Ga0049081_10001954	1	82.54	92.6471	32	3.125
DvSAG_27_D11	Ga0049081_10002058	1	81.84	95.186	32	3.125
DvSAG_27_D11	Ga0049081_10004577	1	82.06	100.333	32	3.125
DvSAG_27_D11	Ga0049082_10001379	1	80.95	94.6479	32	3.125
DvSAG_27_D11	Ga0049082_10001449	1	84.55	98.6547	32	3.125
DvSAG_27_D11	Ga0049082_10002243	1	83.02	100	32	3.125
DvSAG_27_D11	Ga0049083_10000605	1	87.64	92.5926	32	3.125
DvSAG_27_D11	Ga0052187_10074	1	80.48	90.2878	32	3.125
DvSAG_27_D11	Ga0055584_100002943	1	82.44	95.1841	32	3.125
DvSAG_27_D11	Ga0063391_1000077	1	86.49	97.3684	32	3.125
DvSAG_27_D11	Ga0063391_1000462	1	87.5	94.9153	32	3.125
DvSAG_27_D11	Ga0063391_1001617	1	87.8	94.9153	32	3.125
DvSAG_27_D11	Ga0063391_1001829	1	86.49	97.3684	32	3.125
DvSAG_27_D11	Ga0063391_1003002	1	87.5	94.9153	32	3.125
DvSAG_27_D11	Ga0063391_1003266	1	80.18	94.0043	32	3.125
DvSAG_27_D11	Ga0063391_1003470	1	86.49	97.3684	32	3.125
DvSAG_27_D11	Ga0063391_1004334	1	86.49	97.3684	32	3.125
DvSAG_27_D11	Ga0063391_1004372	1	87.8	94.9153	32	3.125
DvSAG_27_D11	Ga0063391_1005448	1	87.8	94.9153	32	3.125
DvSAG_27_D11	Ga0063391_1005491	1	87.5	94.9153	32	3.125
DvSAG_27_D11	Ga0065170_1000179	1	80.65	96.2751	32	3.125
DvSAG_27_D11	Ga0065171_1000121	1	80.9	97.1014	32	3.125
DvSAG_27_D11	Ga0065173_1000053	1	80.65	96.2751	32	3.125
DvSAG_27_D11	Ga0065174_1000281	1	81.48	109.091	32	3.125
DvSAG_27_D11	Ga0065726_18780	1	88.37	91.8149	32	3.125
DvSAG_27_D11	Ga0065861_1000170	2	84.55	99.2662	32	6.25
DvSAG_27_D11	Ga0065861_1061028	1	85.67	95.9885	32	3.125
DvSAG_27_D11	Ga0066222_1000259	2	84.55	99.2662	32	6.25
DvSAG_27_D11	Ga0066222_1086607	1	85.67	95.9885	32	3.125
DvSAG_27_D11	Ga0066224_1039624	2	84.16	99.1779	32	6.25
DvSAG_27_D11	Ga0066224_1074934	1	83.4	92.5094	32	3.125
DvSAG_27_D11	Ga0066370_10000324	1	80.05	94.7826	32	3.125
DvSAG_27_D11	Ga0066371_10000032	1	81.28	95.8425	32	3.125
DvSAG_27_D11	Ga0066372_10001941	1	80.63	104.225	32	3.125
DvSAG_27_D11	Ga0066373_10000078	1	87.5	94.9153	32	3.125
DvSAG_27_D11	Ga0066377_10000285	3	89.1167	99.3498	32	9.375
DvSAG_27_D11	Ga0066607_1000087	1	81.52	100.476	32	3.125
DvSAG_27_D11	Ga0066607_1002171	1	87.54	94.6629	32	3.125
DvSAG_27_D11	Ga0066608_1000127	1	87.54	94.6629	32	3.125
DvSAG_27_D11	Ga0066609_10001838	1	87.54	94.6629	32	3.125
DvSAG_27_D11	Ga0066609_10002760	1	84.52	97.3913	32	3.125
DvSAG_27_D11	Ga0066610_10003286	1	87.54	94.6629	32	3.125
DvSAG_27_D11	Ga0066611_10000126	1	87.54	94.6629	32	3.125
DvSAG_27_D11	Ga0066825_10000051	1	89.76	95.4887	32	3.125
DvSAG_27_D11	Ga0066825_10000192	1	87.8	94.9153	32	3.125
DvSAG_27_D11	Ga0066830_10000026	1	87.8	94.9153	32	3.125
DvSAG_27_D11	Ga0066836_10001942	1	81.14	93.0362	32	3.125
DvSAG_27_D11	Ga0066836_10002732	1	80.08	97.9675	32	3.125
DvSAG_27_D11	Ga0066847_10000938	1	87.8	98.2456	32	3.125
DvSAG_27_D11	Ga0066849_10000212	1	81.44	93.0362	32	3.125
DvSAG_27_D11	Ga0066849_10001360	1	81.02	94.051	32	3.125
DvSAG_27_D11	Ga0066855_10000633	1	91.09	92.2374	32	3.125
DvSAG_27_D11	Ga0066856_10000086	1	81.12	93.4641	32	3.125
DvSAG_27_D11	Ga0066861_10000055	1	80.23	96.0699	32	3.125
DvSAG_27_D11	Ga0066862_10000242	1	81.44	93.0362	32	3.125
DvSAG_27_D11	Ga0068486_1015764	1	82.69	100.971	32	3.125
DvSAG_27_D11	Ga0068500_1136790	1	86.04	90.2439	32	3.125
DvSAG_27_D11	Ga0068872_10000007	1	82.69	94.9008	32	3.125
DvSAG_27_D11	Ga0068872_10001344	1	80	94.0171	32	3.125
DvSAG_27_D11	Ga0068872_10007660	1	80.36	96	32	3.125
DvSAG_27_D11	Ga0068872_10015219	1	86.67	100	32	3.125
DvSAG_27_D11	Ga0068876_10000009	1	81.49	95.4416	32	3.125
DvSAG_27_D11	Ga0068876_10000012	1	82.69	94.9008	32	3.125
DvSAG_27_D11	Ga0068876_10001052	1	82.42	91.0761	32	3.125
DvSAG_27_D11	Ga0068876_10001618	1	84.04	94.4615	32	3.125
DvSAG_27_D11	Ga0068876_10001624	1	82.49	90.3061	32	3.125
DvSAG_27_D11	Ga0068876_10002093	1	80.23	95.4447	32	3.125
DvSAG_27_D11	Ga0068876_10003244	1	83.08	100	32	3.125
DvSAG_27_D11	Ga0068876_10003908	1	87.76	92.2581	32	3.125
DvSAG_27_D11	Ga0068876_10004488	1	83.28	92.7978	32	3.125
DvSAG_27_D11	Ga0068876_10006592	1	87.41	92.2581	32	3.125
DvSAG_27_D11	Ga0068876_10008325	1	84.8	100	32	3.125
DvSAG_27_D11	Ga0068876_10013419	1	80.45	99.5475	32	3.125
DvSAG_27_D11	Ga0068876_10014726	1	80.37	96.9027	32	3.125
DvSAG_27_D11	Ga0070722_10000011	1	86.87	94.1011	32	3.125
DvSAG_27_D11	Ga0070723_10000007	1	86.87	94.1011	32	3.125
DvSAG_27_D11	Ga0070724_10000038	1	86.87	94.1011	32	3.125
DvSAG_27_D11	Ga0070725_10000038	1	86.87	94.1011	32	3.125
DvSAG_27_D11	Ga0070726_10000277	1	86.87	94.1011	32	3.125
DvSAG_27_D11	Ga0070727_10000105	1	86.87	94.1011	32	3.125
DvSAG_27_D11	Ga0070743_10000026	2	82.26	94.7875	32	6.25
DvSAG_27_D11	Ga0070743_10000045	1	85.59	95.1429	32	3.125
DvSAG_27_D11	Ga0070743_10000113	1	86.65	96.5616	32	3.125
DvSAG_27_D11	Ga0070743_10000290	1	89.22	95.702	32	3.125
DvSAG_27_D11	Ga0070743_10003152	1	80.45	96.4912	32	3.125
DvSAG_27_D11	Ga0070744_10000099	1	86.36	102.326	32	3.125
DvSAG_27_D11	Ga0070744_10000204	1	82.09	94.1011	32	3.125
DvSAG_27_D11	Ga0070744_10000431	4	86.6425	99.2745	32	12.5
DvSAG_27_D11	Ga0070745_1000048	1	87.58	94.7368	32	3.125
DvSAG_27_D11	Ga0070745_1000111	1	85.33	95.977	32	3.125
DvSAG_27_D11	Ga0070745_1000652	1	87.16	95.9885	32	3.125
DvSAG_27_D11	Ga0070745_1003395	1	81.6	93.8719	32	3.125
DvSAG_27_D11	Ga0070745_1003935	1	84.03	93.1548	32	3.125
DvSAG_27_D11	Ga0070745_1004792	1	80.68	95.8606	32	3.125
DvSAG_27_D11	Ga0070746_10000003	1	81.25	96.9697	32	3.125
DvSAG_27_D11	Ga0070746_10000116	1	80	95.7143	32	3.125
DvSAG_27_D11	Ga0070746_10000170	1	85.33	95.977	32	3.125
DvSAG_27_D11	Ga0070746_10003872	1	81.57	98.3092	32	3.125
DvSAG_27_D11	Ga0070746_10004022	1	87.97	93.007	32	3.125
DvSAG_27_D11	Ga0070746_10004028	1	80.54	100.913	32	3.125
DvSAG_27_D11	Ga0070746_10004073	1	81.08	95.4155	32	3.125
DvSAG_27_D11	Ga0070746_10004843	1	85.31	98.5981	32	3.125
DvSAG_27_D11	Ga0070747_1000356	1	83.94	94.1463	32	3.125
DvSAG_27_D11	Ga0070747_1001260	1	86.65	95.4674	32	3.125
DvSAG_27_D11	Ga0070747_1001280	1	81.55	92.0548	32	3.125
DvSAG_27_D11	Ga0070747_1001828	1	81.01	93.0939	32	3.125
DvSAG_27_D11	Ga0070747_1002351	2	81.34	95.5534	32	6.25
DvSAG_27_D11	Ga0070748_1000200	1	86.65	95.4674	32	3.125
DvSAG_27_D11	Ga0070748_1000736	1	80	96.0452	32	3.125
DvSAG_27_D11	Ga0070748_1001264	1	83.84	93.3962	32	3.125
DvSAG_27_D11	Ga0070748_1001414	2	86.465	97.1007	32	6.25
DvSAG_27_D11	Ga0070748_1001672	1	81.01	93.0939	32	3.125
DvSAG_27_D11	Ga0070748_1003105	2	85.36	97.5666	32	6.25
DvSAG_27_D11	Ga0070749_10000001	1	81.55	96.2751	32	3.125
DvSAG_27_D11	Ga0070749_10000005	1	85.95	99.4624	32	3.125
DvSAG_27_D11	Ga0070749_10000010	1	80.45	98.6547	32	3.125
DvSAG_27_D11	Ga0070749_10000055	2	81.86	96.7592	32	6.25
DvSAG_27_D11	Ga0070749_10000081	2	84.025	97.3004	32	6.25
DvSAG_27_D11	Ga0070749_10000131	1	80	95.7143	32	3.125
DvSAG_27_D11	Ga0070749_10000136	2	82.77	95.8063	32	6.25
DvSAG_27_D11	Ga0070749_10000171	2	82.925	99.0144	32	6.25
DvSAG_27_D11	Ga0070749_10000193	2	83.995	96.7055	32	6.25
DvSAG_27_D11	Ga0070749_10000753	1	85.16	97.3988	32	3.125
DvSAG_27_D11	Ga0070749_10000981	2	81.065	93.8889	32	6.25
DvSAG_27_D11	Ga0070749_10001364	1	84.92	93.8462	32	3.125
DvSAG_27_D11	Ga0070749_10001423	2	84.54	95.5988	32	6.25
DvSAG_27_D11	Ga0070749_10002237	2	85.95	98.8851	32	6.25
DvSAG_27_D11	Ga0070749_10002403	1	82.14	95.4545	32	3.125
DvSAG_27_D11	Ga0070749_10002972	1	85.97	91.2807	32	3.125
DvSAG_27_D11	Ga0070749_10003006	1	80.54	96.2963	32	3.125
DvSAG_27_D11	Ga0070749_10003345	1	82.79	93.0939	32	3.125
DvSAG_27_D11	Ga0070749_10003550	1	80.54	95.1567	32	3.125
DvSAG_27_D11	Ga0070749_10004610	1	80.95	94.6479	32	3.125
DvSAG_27_D11	Ga0070749_10006271	1	83.13	100	32	3.125
DvSAG_27_D11	Ga0070749_10007748	1	81.13	100	32	3.125
DvSAG_27_D11	Ga0070749_10011147	1	85.51	100	32	3.125
DvSAG_27_D11	Ga0070750_10000104	1	80	95.7143	32	3.125
DvSAG_27_D11	Ga0070750_10000468	1	81.25	96.9697	32	3.125
DvSAG_27_D11	Ga0070750_10000659	1	82.74	95.1841	32	3.125
DvSAG_27_D11	Ga0070750_10000778	1	81.19	94.3662	32	3.125
DvSAG_27_D11	Ga0070750_10003456	1	80.54	100.913	32	3.125
DvSAG_27_D11	Ga0070750_10003596	1	82.79	93.0939	32	3.125
DvSAG_27_D11	Ga0070750_10006205	2	85.265	96.4844	32	6.25
DvSAG_27_D11	Ga0070750_10007084	1	81.08	95.4155	32	3.125
DvSAG_27_D11	Ga0070751_1000052	1	87.58	94.7368	32	3.125
DvSAG_27_D11	Ga0070751_1000164	1	85.33	95.977	32	3.125
DvSAG_27_D11	Ga0070751_1000528	1	83.84	98.2833	32	3.125
DvSAG_27_D11	Ga0070751_1000866	1	86.83	96.5318	32	3.125
DvSAG_27_D11	Ga0070751_1002319	1	87.16	95.9885	32	3.125
DvSAG_27_D11	Ga0070751_1003418	1	80.68	95.8606	32	3.125
DvSAG_27_D11	Ga0070751_1004718	1	82.3	94.1441	32	3.125
DvSAG_27_D11	Ga0070751_1006939	1	81.6	93.8719	32	3.125
DvSAG_27_D11	Ga0070752_1000162	1	85.33	95.977	32	3.125
DvSAG_27_D11	Ga0070752_1000378	1	87.58	94.7368	32	3.125
DvSAG_27_D11	Ga0070752_1000890	2	84.35	94.9325	32	6.25
DvSAG_27_D11	Ga0070752_1002402	1	81.94	98.4127	32	3.125
DvSAG_27_D11	Ga0070752_1002747	1	87.16	95.9885	32	3.125
DvSAG_27_D11	Ga0070752_1003431	1	82.11	90.1099	32	3.125
DvSAG_27_D11	Ga0070752_1003445	1	88.48	91.0112	32	3.125
DvSAG_27_D11	Ga0070752_1007090	1	80.68	95.8606	32	3.125
DvSAG_27_D11	Ga0070753_1000021	1	87.58	94.7368	32	3.125
DvSAG_27_D11	Ga0070753_1001282	1	88.77	100	32	3.125
DvSAG_27_D11	Ga0070753_1003008	1	80.68	95.8606	32	3.125
DvSAG_27_D11	Ga0070753_1003379	1	81.6	93.8719	32	3.125
DvSAG_27_D11	Ga0070753_1003466	1	86.83	96.5318	32	3.125
DvSAG_27_D11	Ga0070753_1003530	1	85.91	92.6752	32	3.125
DvSAG_27_D11	Ga0070754_10000043	1	87.65	95.1289	32	3.125
DvSAG_27_D11	Ga0070754_10000131	1	82.04	95.702	32	3.125
DvSAG_27_D11	Ga0070754_10000390	1	81	98.0392	32	3.125
DvSAG_27_D11	Ga0070754_10000491	1	85.91	98.2143	32	3.125
DvSAG_27_D11	Ga0070754_10000519	1	86.83	96.5318	32	3.125
DvSAG_27_D11	Ga0070754_10001079	1	83.94	102.484	32	3.125
DvSAG_27_D11	Ga0070754_10001548	1	86.42	91.6955	32	3.125
DvSAG_27_D11	Ga0070754_10001695	1	80.23	95.6044	32	3.125
DvSAG_27_D11	Ga0070754_10002729	1	80	97.561	32	3.125
DvSAG_27_D11	Ga0070754_10003517	1	80.05	96.0784	32	3.125
DvSAG_27_D11	Ga0070754_10003545	1	83.61	98.7552	32	3.125
DvSAG_27_D11	Ga0070754_10008140	1	80.68	95.8606	32	3.125
DvSAG_27_D11	Ga0070754_10010100	1	81.6	93.8719	32	3.125
DvSAG_27_D11	Ga0073579_1094745	1	80.86	105.195	32	3.125
DvSAG_27_D11	Ga0073579_1188985	1	82.2	97.1182	32	3.125
DvSAG_27_D11	Ga0074647_1000003	2	83.875	95.5645	32	6.25
DvSAG_27_D11	Ga0074647_1000193	2	81.79	95.2309	32	6.25
DvSAG_27_D11	Ga0074648_1000298	2	81.99	95.8631	32	6.25
DvSAG_27_D11	Ga0074648_1000621	1	85.33	95.977	32	3.125
DvSAG_27_D11	Ga0074648_1000825	2	83.875	95.5645	32	6.25
DvSAG_27_D11	Ga0074648_1001966	1	82.93	95.702	32	3.125
DvSAG_27_D11	Ga0074648_1009548	1	81.86	96.2882	32	3.125
DvSAG_27_D11	Ga0074649_1000232	1	80.45	95.8606	32	3.125
DvSAG_27_D11	Ga0074649_1006144	1	80.37	95.4248	32	3.125
DvSAG_27_D11	Ga0075030_100000774	1	80.48	95.4155	32	3.125
DvSAG_27_D11	Ga0075108_10000182	1	82.54	92.6471	32	3.125
DvSAG_27_D11	Ga0075109_1000723	1	81.19	90.5405	32	3.125
DvSAG_27_D11	Ga0075109_1001711	1	83.98	93.3518	32	3.125
DvSAG_27_D11	Ga0075110_1000023	1	82.69	95.7143	32	3.125
DvSAG_27_D11	Ga0075110_1001841	1	81.19	90.5405	32	3.125
DvSAG_27_D11	Ga0075117_1000246	1	82.54	92.6471	32	3.125
DvSAG_27_D11	Ga0075117_1001202	1	87.01	96.5015	32	3.125
DvSAG_27_D11	Ga0075117_1003035	1	81.12	96.5517	32	3.125
DvSAG_27_D11	Ga0075118_10000618	1	81.19	90.5405	32	3.125
DvSAG_27_D11	Ga0075118_10002409	1	83.98	93.3518	32	3.125
DvSAG_27_D11	Ga0075119_1001288	1	81.19	90.5405	32	3.125
DvSAG_27_D11	Ga0075441_10000001	1	86.79	94.3343	32	3.125
DvSAG_27_D11	Ga0075441_10000085	2	82.12	94.1636	32	6.25
DvSAG_27_D11	Ga0075441_10000721	1	85.76	94.1341	32	3.125
DvSAG_27_D11	Ga0075441_10004126	1	82.8	92.5373	32	3.125
DvSAG_27_D11	Ga0075443_10000002	1	86.79	94.3343	32	3.125
DvSAG_27_D11	Ga0075443_10000049	2	81.85	94.3045	32	6.25
DvSAG_27_D11	Ga0075443_10000554	1	83.89	95.6395	32	3.125
DvSAG_27_D11	Ga0075444_10000004	1	82.04	97.9472	32	3.125
DvSAG_27_D11	Ga0075444_10000099	1	88.89	95.4545	32	3.125
DvSAG_27_D11	Ga0075444_10000902	1	87.72	97.7143	32	3.125
DvSAG_27_D11	Ga0075444_10003264	1	83.89	95.6395	32	3.125
DvSAG_27_D11	Ga0075445_10000161	1	80.95	95.7265	32	3.125
DvSAG_27_D11	Ga0075445_10000832	1	84.27	95.7386	32	3.125
DvSAG_27_D11	Ga0075445_10001794	2	80.635	100.231	32	6.25
DvSAG_27_D11	Ga0075445_10001867	1	83.89	95.6395	32	3.125
DvSAG_27_D11	Ga0075446_10000791	1	82.01	92.1196	32	3.125
DvSAG_27_D11	Ga0075447_10000329	1	84.27	95.7386	32	3.125
DvSAG_27_D11	Ga0075447_10001238	1	82.01	92.1196	32	3.125
DvSAG_27_D11	Ga0075447_10001437	1	87.83	95.1977	32	3.125
DvSAG_27_D11	Ga0075448_10002261	1	85.86	90.411	32	3.125
DvSAG_27_D11	Ga0075458_10001973	1	82.99	94.9008	32	3.125
DvSAG_27_D11	Ga0075460_10000180	2	82.925	93.5933	32	6.25
DvSAG_27_D11	Ga0075460_10000458	1	87.58	94.7368	32	3.125
DvSAG_27_D11	Ga0075462_10000058	1	87.69	95.1429	32	3.125
DvSAG_27_D11	Ga0075462_10000072	1	81.19	94.3662	32	3.125
DvSAG_27_D11	Ga0075462_10000639	1	85.16	96.5616	32	3.125
DvSAG_27_D11	Ga0075462_10000893	1	82.79	93.0939	32	3.125
DvSAG_27_D11	Ga0075463_10000181	1	85.16	96.5616	32	3.125
DvSAG_27_D11	Ga0075463_10000353	3	89.5933	97.2492	32	9.375
DvSAG_27_D11	Ga0075463_10000419	1	82.79	93.0939	32	3.125
DvSAG_27_D11	Ga0075463_10001184	1	81.57	98.3092	32	3.125
DvSAG_27_D11	Ga0075463_10001214	1	80.54	100.913	32	3.125
DvSAG_27_D11	Ga0075463_10001675	1	80.49	91.1111	32	3.125
DvSAG_27_D11	Ga0075464_10000122	1	80.9	93.3148	32	3.125
DvSAG_27_D11	Ga0075466_1000067	1	83.27	90.2878	32	3.125
DvSAG_27_D11	Ga0075466_1000191	1	86.65	95.4674	32	3.125
DvSAG_27_D11	Ga0075466_1000292	1	80	96.0452	32	3.125
DvSAG_27_D11	Ga0075466_1000353	1	83.38	96.0114	32	3.125
DvSAG_27_D11	Ga0075466_1001383	1	81.01	93.0939	32	3.125
DvSAG_27_D11	Ga0075467_10000426	1	86.65	95.4674	32	3.125
DvSAG_27_D11	Ga0075467_10003071	1	80.71	97.9651	32	3.125
DvSAG_27_D11	Ga0075467_10005133	1	80.71	93.0939	32	3.125
DvSAG_27_D11	Ga0075468_10001882	2	82.34	95.5011	32	6.25
DvSAG_27_D11	Ga0075468_10003594	2	82.13	95.6302	32	6.25
DvSAG_27_D11	Ga0075468_10004493	1	85.48	91.1765	32	3.125
DvSAG_27_D11	Ga0075469_10000246	2	81.34	95.5534	32	6.25
DvSAG_27_D11	Ga0075469_10003385	2	80.5	98.2669	32	6.25
DvSAG_27_D11	Ga0075471_10000546	2	82.27	95.8346	32	6.25
DvSAG_27_D11	Ga0075471_10000685	2	82.635	94.6556	32	6.25
DvSAG_27_D11	Ga0075472_10000677	1	80.06	96.2751	32	3.125
DvSAG_27_D11	Ga0075473_10000165	2	82.635	94.6556	32	6.25
DvSAG_27_D11	Ga0075473_10001338	2	82.27	95.8346	32	6.25
DvSAG_27_D11	Ga0075474_10001064	1	89.25	91.1765	32	3.125
DvSAG_27_D11	Ga0075474_10004762	1	80.23	95.6044	32	3.125
DvSAG_27_D11	Ga0075475_10000184	1	87.69	95.1429	32	3.125
DvSAG_27_D11	Ga0075475_10000273	1	89.25	91.1765	32	3.125
DvSAG_27_D11	Ga0075475_10000348	1	93.1	100	32	3.125
DvSAG_27_D11	Ga0075475_10000952	1	82.81	96.9697	32	3.125
DvSAG_27_D11	Ga0075475_10001064	1	84.68	95.4155	32	3.125
DvSAG_27_D11	Ga0075475_10001380	1	80.71	94.1341	32	3.125
DvSAG_27_D11	Ga0075475_10001817	2	83.51	97.1138	32	6.25
DvSAG_27_D11	Ga0075475_10002777	1	81.12	98.5465	32	3.125
DvSAG_27_D11	Ga0075475_10003229	1	81.6	93.8719	32	3.125
DvSAG_27_D11	Ga0075476_10000034	1	82.04	95.702	32	3.125
DvSAG_27_D11	Ga0075476_10000039	1	80.23	95.6044	32	3.125
DvSAG_27_D11	Ga0075476_10000085	1	82.5	104.348	32	3.125
DvSAG_27_D11	Ga0075476_10000212	1	82.81	96.9697	32	3.125
DvSAG_27_D11	Ga0075476_10000437	1	85.91	98.2143	32	3.125
DvSAG_27_D11	Ga0075476_10000515	1	83.97	98.4962	32	3.125
DvSAG_27_D11	Ga0075476_10002744	1	81.6	93.8719	32	3.125
[truncated: 133,828 more rows]
